# Supplementary material for: Borate-mediated aryl polyfluoroalkoxylation under transition-metal-free conditions
Source: Royal Society of Chemistry journal article supplement (doi:10.1039/d4cc04008b), 2024-01-01

## Supplementary Information

### Borate-Mediated Aryl Polyfluoroalkoxylation under Transition-Metal-Free Conditions

Kotaro Kikushima,<sup>\*a</sup> Tomoka Tsuda,<sup>a</sup> Naoki Miyamoto,<sup>a</sup>

Yasuyuki Kita<sup>\*b</sup> and Toshifumi Dohi<sup>\*a,b</sup>

<sup>a</sup> College of Pharmaceutical Sciences, Ritsumeikan University, Kusatsu 525-8577 Shiga, Japan.

E-mail: kixy@fc.ritsumeai.ac.jp, td1203@ph.ritsumeai.ac.jp

<sup>b</sup> Research Organization of Science and Technology, Ritsumeikan University, Kusatsu 525-8577 Shiga, Japan.

#### Table of contents

|    |                                                                      |    |
|----|----------------------------------------------------------------------|----|
| 1. | General information                                                  | 2  |
| 2. | Preparation of tetrakis(fluoroalkoxy)borate salts                    | 3  |
| 3. | Optimization of reaction conditions                                  | 4  |
| 4. | Fluoroalkoxylation of 2-TMP-OTs                                      | 6  |
| 5. | Trifluoroethoxylation of (4-bromomethylphenyl)(TMP)iodonium tosylate | 23 |
| 6. | NMR monitoring of trifluoroethoxylation of 2f-OTs-TMP                | 23 |
| 7. | References                                                           | 25 |
| 8. | NMR spectra                                                          | 26 |

## 1. General information

**Experiment and materials:** All commercially available reagents were used as received unless otherwise noted. Sodium tetrakis(fluoroalkoxy)borate salts were synthesized according to previously reported methods in the literatures.<sup>1,2</sup> Diaryliodonium salts were employed as reported in our previous studies,<sup>3</sup> which were synthesized by the methods reported in the literature.<sup>4</sup> All reactions that required heating were performed using an oil bath or a metal block as a heating source. Flash column chromatography was carried out on Merck silica gel 60 (230-400 mesh).

**Analysis:** Melting points were measured using a Büchi B 545 apparatus and were uncorrected. <sup>1</sup>H and <sup>13</sup>C nuclear magnetic resonance (NMR) spectra were recorded on a JEOL JNM-AL400 spectrometer (<sup>1</sup>H NMR: 400 MHz, <sup>19</sup>F NMR: 376 MHz, and <sup>13</sup>C NMR: 100 MHz) at 25 °C. The chemical shifts in <sup>1</sup>H NMR spectra were recorded relative to residual solvent peaks (CDCl<sub>3</sub>: δ 7.26, DMSO-*d*<sub>6</sub>: δ 2.50). The chemical shifts in <sup>19</sup>F NMR spectrum were recorded relative to residual solvent peaks (PhCF<sub>3</sub>: δ -63.0 ppm, 4-fluorotoluene: δ -121.0 ppm). The chemical shifts in <sup>13</sup>C NMR spectrum were recorded relative to residual solvent peaks (CDCl<sub>3</sub>: δ 77.00 ppm, DMSO-*d*<sub>6</sub>: δ 39.52 ppm). The data are reported as follows: chemical shift in ppm (δ), multiplicity (s = singlet, d = doublet, t = triplet, sept = septet, and m = multiplet), coupling constant (Hz), and integration. Infrared spectra (IR) were obtained using a Hitachi 270-50 spectrometer; absorptions are reported in reciprocal centimeters (cm<sup>-1</sup>) for strong and structurally important peaks. High-resolution mass spectra (HRMS) were obtained using a JMS-T100LP AccuTOF<sup>TM</sup> LC-Express. Analytical TLC was performed on Merck Silica gel F<sub>254</sub> plates (0.25 mm). The spots and bands were detected by UV irradiation (254 nm) or by staining with 3% *p*-anisaldehyde followed by heating.

## 2. Preparation of tetrakis(fluoroalkoxy)borate salts

### 2-1. Preparation of 1a

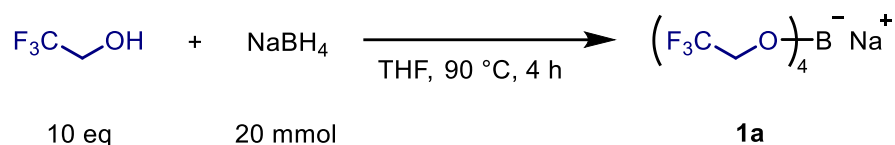

The title compound was prepared according to the modified procedure previously described.<sup>S1</sup> A screw-capped test tube was charged with sodium borohydride (756 mg, 20 mmol) and THF (30 mL). 2,2,2-Trifluoroethyl alcohol (14.3 mL, 200 mmol, 10 eq) was added dropwise to the stirring mixture. After the mixture was stirred at 90 °C for 4 h, the solvent was evaporated under reduced pressure. The residue was dried by vacuum pump to afford the title compound in quantitative yield (8.583 g, 20.0 mmol) as a white solid.

**Melting point:** >450 °C

**<sup>1</sup>H NMR (400 MHz, DMSO-*d*<sub>6</sub>):** δ 3.66 (q, *J* = 10.1 Hz, 8H) ppm.

**<sup>19</sup>F NMR (376 MHz, DMSO-*d*<sub>6</sub>):** δ -76.9 (t, *J* = 9.8 Hz, 12 F) ppm.

**<sup>13</sup>C NMR (100 MHz, DMSO-*d*<sub>6</sub>):** δ 126.4 (q, *J* = 278.5 Hz), 59.8 (q, *J* = 32.4 Hz) ppm.

**IR (KBr):** 2953, 2900, 1425, 1277, 1173, 1120, 1054, 981, 835, 675 cm<sup>-1</sup>.

Spectrum data of **1a** were matched with the product reported in the literature.<sup>S1</sup>

### 2-2. Preparation of 1b•(DME)<sub>3</sub>

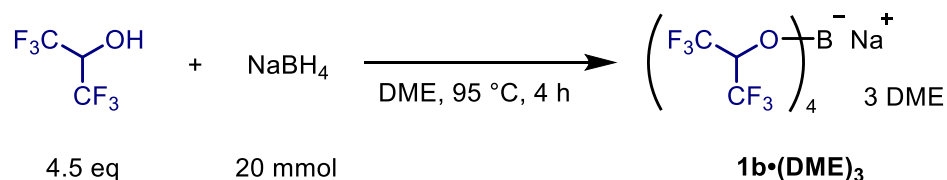

The title compound was prepared according to the modified procedure previously described.<sup>S2</sup> A screw-capped test tube was charged with sodium borohydride (756 mg, 20 mmol) and 1,2-dimethoxyethane (35 mL). 1,1,1,3,3,3-Hexafluoroisopropyl alcohol (10.0 mL, 90 mmol, 4.5 eq) was added dropwise to the stirring mixture. After the mixture was stirred at 95 °C for 4 h,

the solvent was evaporated under reduced pressure. The residue was azeotroped with ether at 45 °C several times and then dried by vacuum pump to generate a colorless solid. <sup>1</sup>H NMR analysis of the obtained product indicated that 3 equiv of DME remained. The title compound was afforded in 95% yield (18.476 g, 19.0 mmol) as a colorless solid.

**Melting point:** 98.5–100.4 °C

**<sup>1</sup>H NMR (400 MHz, DMSO-*d*<sub>6</sub>):** δ 4.66 (brs, 4H), 3.56 (s, 12H), 3.93 (s, 18H) ppm.

**<sup>19</sup>F NMR (376 MHz, DMSO-*d*<sub>6</sub>):** δ -76.0 (s, 24F) ppm.

**<sup>13</sup>C NMR (100 MHz, DMSO-*d*<sub>6</sub>):** δ 122.4 (q, *J* = 282.4 Hz), 71.5, 69.3 (sept, *J* = 32.5 Hz), 59.1 ppm.

**IR (KBr):** 2943, 1457, 1380, 1192, 1101, 1027, 862, 743, 688, 656 cm<sup>-1</sup>.

Spectrum data of **1b**•(DME)<sub>3</sub> were matched with the product reported in the literature.<sup>S2</sup>

### 3. Optimization of reaction conditions

**Table S1.** Reaction of **1a** with **2a-TMP-OAc**

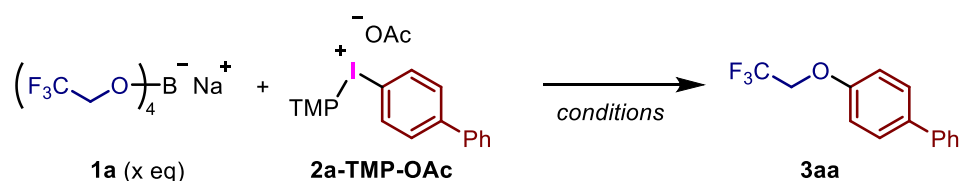

| entry | <b>1a</b> (eq) | solvent                                     | time (h) | temp. (°C) | <sup>1</sup> H NMR yield of <b>3aa</b> (%) |
|-------|----------------|---------------------------------------------|----------|------------|--------------------------------------------|
| 1     | 1              | toluene                                     | 24       | 100        | 24%                                        |
| 2     | 1              | toluene / H <sub>2</sub> O (1:1)            | 24       | 100        | 86%                                        |
| 3     | 1              | toluene / H <sub>2</sub> O (1:1)            | 24       | 80         | 53%                                        |
| 4     | 1              | toluene / H <sub>2</sub> O (1:1)            | 24       | 60         | 53% (48% isol.)                            |
| 5     | 1              | DCE / H <sub>2</sub> O (1:1)                | 24       | 60         | 18%                                        |
| 6     | 2              | CH <sub>3</sub> CN / H <sub>2</sub> O (1:1) | 24       | 80         | 18%                                        |
| 7     | 1              | EtOAc / H <sub>2</sub> O (1:1)              | 65       | 80         | 14%                                        |
| 8     | 1              | toluene / H <sub>2</sub> O (1:4)            | 24       | 100        | 95%                                        |
| 9     | 1              | toluene / H <sub>2</sub> O (4:1)            | 24       | 100        | 88%                                        |
| 10    | 1              | toluene / H <sub>2</sub> O (1:4)            | 24       | 70         | 81%                                        |
| 11    | 1              | toluene / H <sub>2</sub> O (4:1)            | 24       | 70         | 96% (82% isol.)                            |
| 12    | 1              | H <sub>2</sub> O                            | 50       | 100        | 0%                                         |

**Table S2. Reaction of 1a with 2a-TMP-OTs**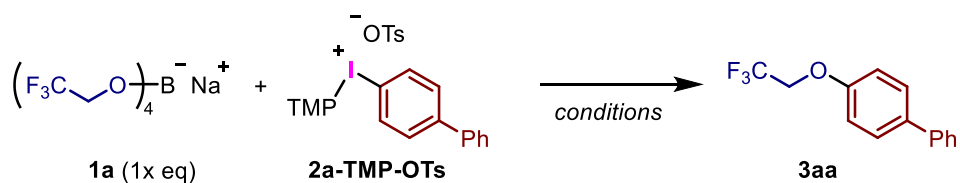

| entry | 1a (eq) | solvent                          | time (h) | temp. (°C) | <sup>1</sup> H NMR yield of 3aa (%) |
|-------|---------|----------------------------------|----------|------------|-------------------------------------|
| 1     | 1       | toluene                          | 24       | 100        | 35%                                 |
| 2     | 1       | acetonitrile                     | 24       | 100        | 76%                                 |
| 3     | 1       | DME                              | 24       | 100        | 16%                                 |
| 4     | 1       | toluene / H <sub>2</sub> O (1:1) | 24       | 100        | 95%                                 |
| 5     | 1       | toluene / H <sub>2</sub> O (4:1) | 24       | 100        | >99% (80% isol.)                    |
| 6     | 1       | toluene / H <sub>2</sub> O (1:4) | 24       | 100        | >99% (84% isol.)                    |
| 7     | 1       | hexane / H <sub>2</sub> O (4:1)  | 24       | 100        | 70%                                 |
| 8     | 1       | hexane / H <sub>2</sub> O (1:4)  | 24       | 100        | 55% (54% isol.)                     |
| 9     | 1       | EtOAc / H <sub>2</sub> O (4:1)   | 24       | 100        | 9%                                  |
| 10    | 1       | EtOAc / H <sub>2</sub> O (1:4)   | 24       | 100        | 7%                                  |
| 11    | 1       | DME / H <sub>2</sub> O (4:1)     | 24       | 100        | 20%                                 |
| 12    | 1       | toluene / H <sub>2</sub> O (4:1) | 24       | 70         | 96% (88% isol.)                     |
| 13    | 2       | toluene / H <sub>2</sub> O (4:1) | 24       | 100        | >99%                                |
| 14    | 2       | toluene / H <sub>2</sub> O (4:1) | 24       | 70         | >99% (94% isol.)                    |
| 15    | 2       | toluene / H <sub>2</sub> O (4:1) | 2        | 70         | >99% (94% isol.)                    |

**Table S3. Reaction of 1a with 2b-TMP-OAc**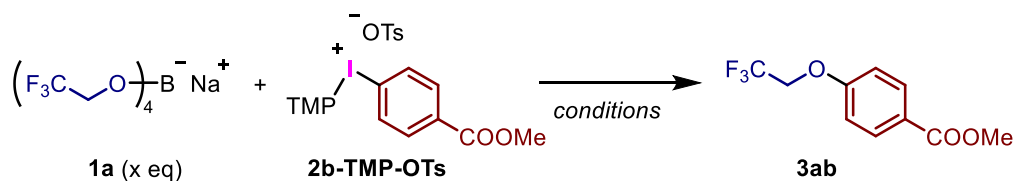

| entry | 1a (eq) | solvent                           | time (h) | temp. (°C) | <sup>1</sup> H NMR yield of 3ab (%) |
|-------|---------|-----------------------------------|----------|------------|-------------------------------------|
| 1     | 1       | toluene                           | 24       | 70         | 32%                                 |
| 2     | 1       | toluene / H <sub>2</sub> O (1:1)  | 24       | 70         | 70%                                 |
| 3     | 1       | toluene / H <sub>2</sub> O (1:4)  | 24       | 70         | 65%                                 |
| 4     | 1       | toluene / H <sub>2</sub> O (10:1) | 24       | 70         | 75%                                 |
| 5     | 1       | toluene / H <sub>2</sub> O (4:1)  | 24       | 70         | 85%                                 |
| 6     | 1       | toluene / H <sub>2</sub> O (4:1)  | 24       | 100        | 69%                                 |
| 7     | 1       | toluene / H <sub>2</sub> O (4:1)  | 24       | 50         | 78%                                 |
| 8     | 2       | toluene / H <sub>2</sub> O (4:1)  | 24       | 70         | 90% (74% isol.)                     |

#### 4. Fluoroalkoxylation of 2-TMP-OTs

##### General procedure A

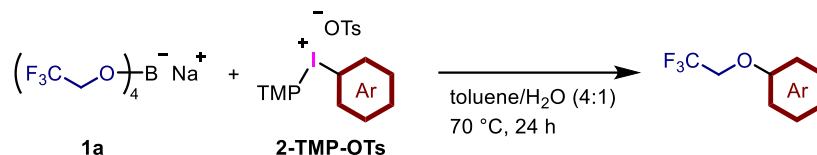

In a screw-capped test tube, sodium tetrakis(trifluoroethoxy)borate **1a** (171.7 mg, 0.40 mmol, 2.0 eq) and TMP-iodonium tosylate **2-TMP-OTs** (0.20 mmol) were dissolved in a mixed solvent of toluene and water (4:1, 4 mL). The mixture was stirred at 70 °C for 24 h using a metal block. After cooling to room temperature, the organic layer was decanted. The residual water layer was extracted with hexane (2 × 4 mL). The combined organic solution was washed with brine (2 × 4 mL), and then <sup>19</sup>F NMR analysis of the crude mixture was carried out with CDCl<sub>3</sub> and PhCF<sub>3</sub> (internal standard) to determine the NMR yield. After concentrating the organic solution under reduced pressure, the residue was purified by column chromatography (SiO<sub>2</sub>) to afford the corresponding trifluoroethoxy arene.

##### General procedure B

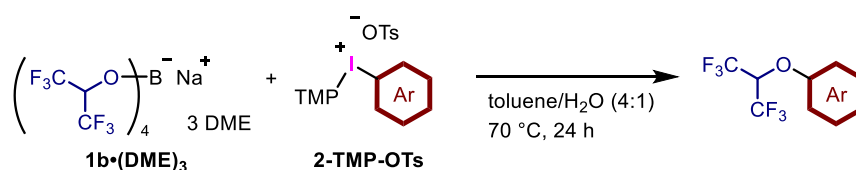

In a screw-capped test tube, sodium tetrakis(hexafluoroisopropoxy)borate **1b•(DME)<sub>3</sub>** (280.0 mg, 0.288 mmol, 1.44 eq) and TMP-iodonium tosylate **2-TMP-OTs** (0.20 mmol) were dissolved in a mixed solvent of toluene and water (4:1, 4 mL). The mixture was stirred at 70 °C for 24 h using a metal block. After cooling to room temperature, the organic layer was decanted. The residual water layer was extracted with hexane (2 × 4 mL). The combined organic solution was washed with brine (2 × 4 mL), and then <sup>19</sup>F NMR analysis of the crude

mixture was carried out with  $\text{CDCl}_3$  and  $\text{PhCF}_3$  (internal standard) to determine the NMR yield. After concentrating the organic solution under reduced pressure, the residue was purified by column chromatography ( $\text{SiO}_2$ ) to afford the corresponding trifluoroethoxy arene.

### General procedure C

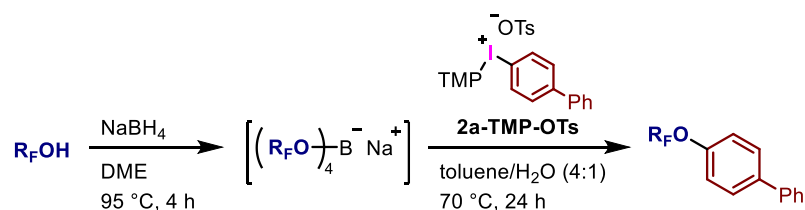

A screw-capped test tube was charged with sodium borohydride (37.8 mg, 1.0 mmol, 2.0 eq) and 1,3-dimethoxyethane (1.5 mL). The polyfluoroalcohol (4.0 mmol, 8.0 eq) was added dropwise to the stirring mixture. After the mixture was stirred at 95 °C for 4 h, the solvent was evaporated under reduced pressure. The residual solid was dissolved in a mixed solvent of toluene and water (4:1, 10 mL), and then (4-phenylphenyl)(TMP)iodonium tosylate **2a-OTs** (301.2 mg, 0.50 mmol) was added to the mixture. The mixture was stirred at 70 °C for 24 h using a metal block. After cooling to room temperature, the organic layer was decanted. The residual water layer was extracted with hexane ( $2 \times 10$  mL). The combined organic solution was dried with  $\text{Na}_2\text{SO}_4$ . After filtration to remove the insoluble material followed by concentration of the filtrate, the residue was purified by column chromatography ( $\text{SiO}_2$ , hexane) to afford the corresponding polyfluoroalkoxy arene.

### 4-(2,2,2-Trifluoroethoxy)-1,1'-biphenyl (**3aa**)

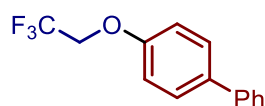

The title compound (**3aa**) was synthesized by the general procedure A using (4-phenylphenyl)(TMP)iodonium tosylate (**2a-OTs**, 123.7 mg, 0.20 mmol).  $^{19}\text{F}$  NMR analysis of

crude mixture indicated that **3aa** was generated in a quantitative yield. Purification by column chromatography (SiO<sub>2</sub>, hexane) afforded **3aa** in 94% yield (47.2 mg, 0.187 mmol) as a colorless solid.

**Melting Point:** 96.6–98.3 °C

**<sup>1</sup>H NMR (400 MHz, CDCl<sub>3</sub>):** δ 7.57 (d, *J* = 8.8 Hz, 4H), 7.45 (t, *J* = 7.6 Hz, 2H), 7.35 (t, *J* = 7.2 Hz, 1H), 7.03 (d, *J* = 8.8 Hz, 2H), 4.40 (q, *J* = 8.0 Hz, 2H) ppm.

**<sup>19</sup>F NMR (376 MHz, CDCl<sub>3</sub>):** δ -76.3 (t, *J* = 8.5 Hz, 3F)

**<sup>13</sup>C{<sup>1</sup>H} NMR (100 MHz, CDCl<sub>3</sub>):** δ 156.9, 140.3, 135.7, 128.8, 128.4, 127.0, 126.8, 123.3 (q, *J* = 276.6 Hz), 115.2, 65.9 (q, *J* = 35.4 Hz) ppm.

**IR (KBr):** 3019, 1602, 1523, 1427, 1224, 913, 722 cm<sup>-1</sup>.

**HRMS (DART) m/z:** ([M+H]<sup>+</sup>) Calcd for C<sub>14</sub>H<sub>12</sub>OF<sub>3</sub><sup>+</sup> 253.08348; Found 253.08333.

Spectrum data of **3aa** were matched with the product reported in the literature.<sup>S5.6.7</sup>

#### Methyl 4-(2,2,2-trifluoroethoxy)benzoate (**3ab**)

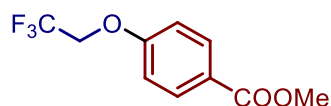

The title compound (**3ab**) was synthesized by the general procedure A using (4-methoxycarbonylphenyl)(TMP)iodonium tosylate (**2b-OTs**, 120.0 mg, 0.20 mmol). <sup>19</sup>F NMR analysis of crude mixture indicated that **3ab** was generated in 90% yield. Purification by column chromatography (SiO<sub>2</sub>, AcOEt/hexane = 1:20) afforded **3ab** in 74% yield (34.7 mg, 0.148 mmol) as a colorless solid.

**Melting Point:** 54.5–56.0 °C

**<sup>1</sup>H NMR (400 MHz, CDCl<sub>3</sub>):** δ 8.02 (d, *J* = 8.8 Hz, 2H), 6.96 (d, *J* = 8.8 Hz, 2H), 4.40 (q, *J* = 8.0 Hz, 2H), 3.89 (s, 3H) ppm.

**<sup>19</sup>F NMR (376 MHz, CDCl<sub>3</sub>):** δ -76.2 (t, *J* = 7.3 Hz, 3F) ppm.

**<sup>13</sup>C{<sup>1</sup>H} NMR (100 MHz, CDCl<sub>3</sub>):** δ 166.4, 160.7, 131.8, 124.5, 123.4 (q, *J* = 276.6), 114.4,



65.5 (q,  $J = 35.9$  Hz), 52.0 ppm.

**IR (KBr):** 3021, 1718, 1605, 1520, 1427, 1230, 912, 795, 745  $\text{cm}^{-1}$ .

**HRMS (DART) m/z:** ( $[M+H]^+$ ) Calcd for  $\text{C}_{10}\text{H}_{10}\text{O}_3\text{F}_3^+$  235.05766; Found 235.05783.

Spectrum data of **3ab** were matched with the product reported in the literature.<sup>S5,8</sup>

### 1-Nitro-4-(2,2,2-trifluoroethoxy)benzene (**3ac**)

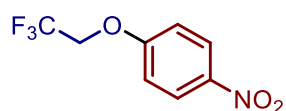

The title compound (**3ac**) was synthesized by the general procedure A using (4-nitrophenyl)(TMP)iodonium tosylate (**2c-OTs**, 117.5 mg, 0.20 mmol).  $^{19}\text{F}$  NMR analysis of crude mixture indicated that **3ac** was generated in 91% yield. Purification by column chromatography ( $\text{SiO}_2$ , AcOEt/hexane = 1:20) afforded **3ac** in 56% yield (24.6 mg, 0.111 mmol) as a colorless solid.

**Melting Point:** 67.3–68.7  $^\circ\text{C}$

**$^1\text{H}$  NMR (400 MHz,  $\text{CDCl}_3$ ):**  $\delta$  8.25 (d,  $J = 9.4$  Hz, 2H), 7.04 (d,  $J = 9.4$  Hz, 2H), 4.46 (q,  $J = 7.9$  Hz, 2H) ppm.

**$^{19}\text{F}$  NMR (376 MHz,  $\text{CDCl}_3$ ):**  $\delta$  -76.0 (t,  $J = 8.5$  Hz, 3F) ppm.

**$^{13}\text{C}\{^1\text{H}\}$  NMR (100 MHz,  $\text{CDCl}_3$ ):**  $\delta$  161.7, 143.0, 126.0, 122.8 (q,  $J = 276.6$  Hz), 114.8, 65.8 (q,  $J = 36.5$  Hz) ppm.

**IR (KBr):** 3021, 1793, 1602, 1520, 1477, 1380, 1349, 1237, 913, 745  $\text{cm}^{-1}$ .

**HRMS (DART) m/z:** ( $[M+H]^+$ ) Calcd for  $\text{C}_8\text{H}_7\text{NO}_3\text{F}_3^+$  222.03725; Found 222.03655.

Spectrum data of **3ac** were matched with the product reported in the literature.<sup>S5,6,8,9</sup>

### 4-(2,2,2-Trifluoroethoxy)benzonitrile (**3ad**)

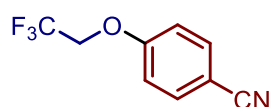

The title compound (**3ad**) was synthesized by the general procedure A using (4-cyanophenyl)(TMP)iodonium tosylate (**2d-OTs**, 113.5 mg, 0.20 mmol).  $^{19}\text{F}$  NMR analysis of crude mixture indicated that **3ad** was generated in 90% yield. Purification by column chromatography ( $\text{SiO}_2$ , AcOEt/hexane = 1:20) afforded **3ad** in 88% yield (35.4 mg, 0.176 mmol) as a colorless solid.

**Melting Point:** 49.8–51.5 °C

$^1\text{H}$  NMR (400 MHz,  $\text{CDCl}_3$ ):  $\delta$  7.64 (d,  $J = 9.4$  Hz, 2H), 7.02 (d,  $J = 9.4$  Hz, 2H), 4.41 (q,  $J = 8.0$  Hz, 2H) ppm.

$^{19}\text{F}$  NMR (376 MHz,  $\text{CDCl}_3$ ):  $\delta$  -76.1 (t,  $J = 8.6$  Hz, 3F) ppm.

$^{13}\text{C}\{^1\text{H}\}$  NMR (100 MHz,  $\text{CDCl}_3$ ):  $\delta$  160.2, 134.2, 122.8 (q,  $J = 276.9$  Hz), 118.5, 115.5, 106.2, 65.6 (q,  $J = 36.2$  Hz) ppm.

IR (KBr): 3017, 2256, 1734, 1602, 1512, 1422, 1223, 1026, 913, 722  $\text{cm}^{-1}$ .

HRMS (DART)  $m/z$ : ( $[\text{M}+\text{H}]^+$ ) Calcd for  $\text{C}_9\text{H}_7\text{NOF}_3^+$  202.04742; Found 202.04678.

Spectrum data of **3ad** were matched with the product reported in the literature.<sup>S5,6,7,8</sup>

### 1-Acetyl-4-(2,2,2-trifluoroethoxy)benzene (**3ae**)

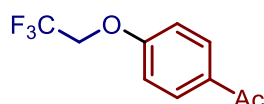

The title compound (**3ae**) was synthesized by the general procedure A using (4-acetylphenyl)(TMP)iodonium tosylate (**2e-OTs**, 116.9 mg, 0.20 mmol).  $^{19}\text{F}$  NMR analysis of crude mixture indicated that **3ae** was generated in 60% yield. Purification by column chromatography ( $\text{SiO}_2$ , AcOEt/hexane = 1:20) afforded **3ad** in 60% yield (26.1 mg, 0.120 mmol) as a colorless solid.

**Melting Point:** 67.6–69.5 °C

$^1\text{H}$  NMR (400 MHz,  $\text{CDCl}_3$ ):  $\delta$  7.96 (d,  $J = 9.0$  Hz, 2H), 6.99 (d,  $J = 9.0$  Hz, 2H), 4.41 (q,  $J = 8.0$  Hz, 2H), 2.57 (s, 3H) ppm.

**<sup>19</sup>F NMR (376 MHz, CDCl<sub>3</sub>):** δ -76.2 (t, *J* = 8.6 Hz, 3F) ppm.

**<sup>13</sup>C{<sup>1</sup>H} NMR (100 MHz, CDCl<sub>3</sub>):** δ 160.8, 131.8, 130.7, 123.0 (q, *J* = 276.6 Hz), 114.4, 65.5 (q, *J* = 36.0 Hz), 26.4 ppm.

**IR (KBr):** 3019, 1677, 1604, 1524, 1423, 1221, 1027, 929, 789, 765 cm<sup>-1</sup>.

Spectrum data of **3ad** were matched with the product reported in the literature.<sup>S5,8</sup>

### 1-Bromo-4-(2,2,2-trifluoroethoxy)benzene (**3af**)

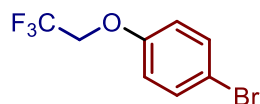

The title compound (**3af**) was synthesized by the general procedure A using (4-bromophenyl)(TMP)iodonium tosylate (**2f-OTs**, 124.3 mg, 0.20 mmol). <sup>19</sup>F NMR analysis of crude mixture indicated that **3af** was generated in 81% yield. Purification by column chromatography (SiO<sub>2</sub>, hexane) afforded **3af** in 64% yield (32.8 mg, 0.129 mmol) as a colorless solid.

**Melting Point:** 40.1–40.9 °C

**<sup>1</sup>H NMR (400 MHz, CDCl<sub>3</sub>):** δ 7.43 (d, *J* = 8.8 Hz, 2H), 6.83 (d, *J* = 8.8 Hz, 2H), 4.32 (q, *J* = 7.9 Hz, 2H) ppm.

**<sup>19</sup>F NMR (376 MHz, CDCl<sub>3</sub>):** δ -76.3 (t, *J* = 7.1 Hz, 3F) ppm.

**<sup>13</sup>C{<sup>1</sup>H} NMR (100 MHz, CDCl<sub>3</sub>):** δ 156.5, 132.6, 123.1 (q, *J* = 276.6 Hz), 116.8, 115.0, 66.0 (q, *J* = 35.6 Hz) ppm.

**IR (KBr):** 3022, 1520, 1489, 1427, 1224, 913, 745, 679 cm<sup>-1</sup>.

**HRMS (DART) m/z:** ([M]) Calcd for C<sub>8</sub>H<sub>6</sub>OF<sub>3</sub>Br 253.95486; Found 253.95453

Spectrum data of **3ae** were matched with the product reported in the literature.<sup>S6,7</sup>

### 1-Methyl-4-(2,2,2-trifluoroethoxy)benzene (**3ag**)

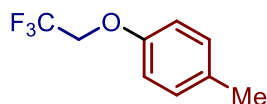

The title compound (**3ag**) was synthesized by the general procedure A using (4-methylphenyl)(TMP)iodonium tosylate (**2g-OTs**, 111.3 mg, 0.20 mmol).  $^{19}\text{F}$  NMR analysis of crude mixture indicated that **3ag** was generated in 90% yield. Purification by column chromatography ( $\text{SiO}_2$ , hexane) afforded **3ag** in 70% yield (26.5 mg, 0.139 mmol) as a colorless oil.

$^1\text{H}$  NMR (400 MHz,  $\text{CDCl}_3$ ):  $\delta$  7.12 (d,  $J = 8.6$  Hz, 2H), 6.85 (d,  $J = 8.6$  Hz, 2H), 4.32 (q,  $J = 8.1$  Hz, 2H), 2.31 (s, 3H) ppm.

$^{19}\text{F}$  NMR (376 MHz,  $\text{CDCl}_3$ ):  $\delta$  -76.4 (t,  $J = 8.6$  Hz, 3F) ppm.

$^{13}\text{C}\{^1\text{H}\}$  NMR (100 MHz,  $\text{CDCl}_3$ ):  $\delta$  155.4, 131.9, 130.1, 123.4 (q,  $J = 276.6$  Hz), 114.8, 66.1 (q,  $J = 34.9$  Hz), 20.5 ppm.

IR (KBr): 3155, 2926, 1794, 1604, 1504, 1382, 1237, 1168, 1104, 913, 744  $\text{cm}^{-1}$ .

Spectrum data of **3af** were matched with the product reported in the literature.<sup>S7</sup>

#### 1-(*tert*-Butyl)-4-(2,2,2-trifluoroethoxy)benzene (**3ah**)

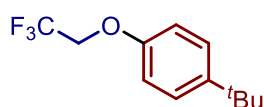

The title compound (**3ah**) was synthesized by the general procedure A using (4-*tert*-butylphenyl)(TMP)iodonium tosylate (**2h-OTs**, 119.7 mg, 0.20 mmol). Purification by column chromatography ( $\text{SiO}_2$ , hexane) afforded **3ah** in 75% yield (34.7 mg, 0.149 mmol) as a colorless oil.

$^1\text{H}$  NMR (400 MHz,  $\text{CDCl}_3$ ):  $\delta$  7.35 (d,  $J = 8.6$  Hz, 2H), 6.89 (d,  $J = 8.6$  Hz, 2H), 4.34 (q,  $J = 8.1$  Hz, 2H), 1.32 (s, 9H) ppm.

$^{19}\text{F}$  NMR (376 MHz,  $\text{CDCl}_3$ ):  $\delta$  -76.4 (t,  $J = 7.3$  Hz, 3F) ppm.

$^{13}\text{C}\{^1\text{H}\}$  NMR (100 MHz,  $\text{CDCl}_3$ ):  $\delta$  155.2, 145.3, 126.5, 123.4 (q,  $J = 276.6$  Hz), 114.4, 66.0

(q,  $J = 35.1$  Hz), 34.2, 31.4 ppm.

**IR (KBr):** 3021, 1734, 1602, 1152, 1427, 1223, 1018, 913, 792, 745  $\text{cm}^{-1}$ .

Spectrum data of **3ag** were matched with the product reported in the literature.<sup>S5,6</sup>

### 1-Methyl-2-(2,2,2-trifluoroethoxy)benzene (**3ai**)

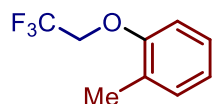

The title compound (**3ai**) was synthesized by the general procedure A using (4-methylphenyl)(TMP)iodonium tosylate (**2i-OTs**, 111.3 mg, 0.20 mmol).  $^{19}\text{F}$  NMR analysis of crude mixture indicated that **3ai** was generated in 91% yield. Purification by column chromatography ( $\text{SiO}_2$ , hexane) afforded **3ai** in 59% yield (22.5 mg, 0.118 mmol) as a colorless oil.

$^1\text{H}$  NMR (400 MHz,  $\text{CDCl}_3$ ):  $\delta$  7.21–7.15 (m, 2H), 6.96 (dd,  $J = 7.6, 7.2$  Hz, 1H), 6.79 (d,  $J = 8.0$  Hz, 1H), 4.35 (q,  $J = 8.1$  Hz, 2H), 2.27 (s, 3H) ppm.

$^{19}\text{F}$  NMR (376 MHz,  $\text{CDCl}_3$ ):  $\delta$  -74.5 (t,  $J = 9.8$  Hz, 3F) ppm.

$^{13}\text{C}\{^1\text{H}\}$  NMR (100 MHz,  $\text{CDCl}_3$ ):  $\delta$  155.5, 131.2, 126.9, 123.5 (q,  $J = 276.7$  Hz), 122.3, 117.6, 111.8, 66.2 (q,  $J = 35.7$  Hz), 15.9 ppm.

**IR (KBr):** 2925, 1739, 1605, 1503, 1237, 1170, 976, 814, 660  $\text{cm}^{-1}$ .

Spectrum data of **3ah** were matched with the product reported in the literature.<sup>S5,7</sup>

### 1,3-Dimethyl-5-(2,2,2-trifluoroethoxy)benzene (**3aj**)

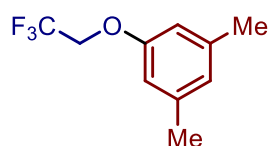

The title compound (**3aj**) was synthesized by the general procedure A using (3,5-dimethylphenyl)(TMP)iodonium tosylate (**2j-OTs**, 114.1 mg, 0.20 mmol).  $^{19}\text{F}$  NMR analysis

of crude mixture indicated that **3aj** was generated in 92% yield. Purification by column chromatography (SiO<sub>2</sub>, hexane) afforded **3aj** in 69% yield (28.0 mg, 0.137 mmol) as a colorless oil.

**<sup>1</sup>H NMR (400 MHz, CDCl<sub>3</sub>):** δ 6.70 (s, 1H), 6.58 (s, 2H), 4.32 (q, *J* = 8.1 Hz, 2H), 2.31 (s, 6H) ppm.

**<sup>19</sup>F NMR (376 MHz, CDCl<sub>3</sub>):** δ -76.4 (t, *J* = 8.5 Hz, 3F) ppm.

**<sup>13</sup>C{<sup>1</sup>H} NMR (100 MHz, CDCl<sub>3</sub>):** δ 157.4, 139.6, 124.2, 123.4 (q, *J* = 276.6 Hz), 112.6, 65.7 (q, *J* = 35.1 Hz), 21.3 ppm.

**IR (KBr):** 3022, 1730, 1602, 1523, 1427, 1221, 1173, 1018, 911, 744 cm<sup>-1</sup>.

**HRMS (DART) m/z:** ([M+H]<sup>+</sup>) Calcd for C<sub>10</sub>H<sub>12</sub>OF<sub>3</sub><sup>+</sup> 205.08348; Found 205.08298.

#### 1-Isobutoxy-3-(2,2,2-trifluoroethoxy)benzene (**3ak**)

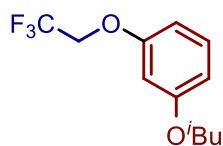

The title compound (**3ak**) was synthesized by the general procedure A using (3-isobutoxyphenyl)(TMP)iodonium tosylate (**2k-OTs**, 122.9 mg, 0.20 mmol). Purification by column chromatography (SiO<sub>2</sub>, hexane) afforded **3ak** in 85% yield (42.1 mg, 0.170 mmol) as a colorless oil.

**<sup>1</sup>H NMR (400 MHz, CDCl<sub>3</sub>):** δ 7.21 (dd, *J* = 8.8, 8.4 Hz, 1H), 6.62–6.59 (m, 1H), 6.53–6.49 (m, 2H), 4.33 (q, *J* = 8.1 Hz, 2H), 3.71 (d, *J* = 6.4 Hz, 2H), 2.08 (sept, *J* = 6.8 Hz, 1H), 1.03 (d, *J* = 6.8 Hz, 6H) ppm.

**<sup>19</sup>F NMR (376 MHz, CDCl<sub>3</sub>):** δ -76.4 (t, *J* = 8.5 Hz, 3F) ppm.

**<sup>13</sup>C{<sup>1</sup>H} NMR (100 MHz, CDCl<sub>3</sub>):** δ 160.6, 158.5, 130.1, 123.3 (q, *J* = 276.6 Hz), 108.7, 106.4, 102.1, 74.5, 65.8 (q, *J* = 35.4 Hz), 28.2, 19.2 ppm.

**IR (KBr):** 3022, 1602, 1492, 1418, 1220, 928, 722 cm<sup>-1</sup>.

**HRMS (DART) m/z:** ( $[M+H]^+$ ) Calcd for  $C_{12}H_{16}O_2F_3^+$  249.10969; Found 249.10879.

### 2-Chloro-5-(2,2,2-trifluoroethoxy)pyridine (**3a**)

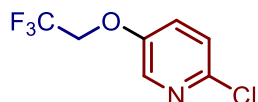

The title compound (**3a**) was synthesized by the general procedure A using (6-chloropyridin-3-yl)(TMP)iodonium tosylate (**2i-OTs**, 115.6 mg, 0.20 mmol).  $^{19}F$  NMR analysis of crude mixture indicated that **3a** was generated in 77% yield. Purification by column chromatography ( $SiO_2$ , AcOEt/hexane = 1:20) afforded **3a** in 72% yield (30.5 mg, 0.144 mmol) as a colorless oil.

$^1H$  NMR (400 MHz,  $CDCl_3$ ):  $\delta$  8.07 (d,  $J = 2.0$  Hz, 1H), 7.25–7.21 (m, 2H), 4.35 (q,  $J = 7.9$  Hz, 2H) ppm.

$^{19}F$  NMR (376 MHz,  $CDCl_3$ ):  $\delta$  -76.2 (t,  $J = 7.3$  Hz, 3F) ppm.

$^{13}C\{^1H\}$  NMR (100 MHz,  $CDCl_3$ ):  $\delta$  152.9, 144.7, 137.0, 125.8, 124.8, 122.8 (q,  $J = 276.6$  Hz), 66.4 (q,  $J = 36.0$  Hz) ppm.

IR (KBr): 2926, 1573, 1458, 1295, 1168, 1073, 975, 910, 831, 744  $cm^{-1}$ .

**HRMS (DART) m/z:** ( $[M+H]^+$ ) Calcd for  $C_7H_6NOF_3Cl^+$  212.00845; Found 212.00771.

### 4-((1,1,1,3,3,3-Hexafluoropropan-2-yl)oxy)-1,1'-biphenyl (**3ba**)

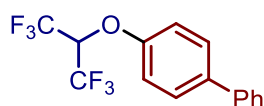

The title compound (**3ba**) was synthesized by the general procedure B using (4-phenylphenyl)(TMP)iodonium tosylate (**2a-OTs**, 123.7 mg, 0.20 mmol). Purification by column chromatography ( $SiO_2$ , hexane) afforded **3ba** in 91% yield (58.1 mg, 0.181 mmol) as a colorless solid.

**Melting Point:** 51.9–53.0  $^{\circ}C$

**<sup>1</sup>H NMR (400 MHz, CDCl<sub>3</sub>):** δ 7.59 (d, *J* = 8.8 Hz, 2H), 7.57 (d, *J* = 7.2 Hz, 2H), 7.46 (t, *J* = 7.6 Hz, 2H), 7.37 (t, *J* = 7.6 Hz, 1H), 7.17 (d, *J* = 8.4 Hz, 2H), 4.86 (sept, *J* = 5.7 Hz, 1H) ppm.

**<sup>19</sup>F NMR (376 MHz, CDCl<sub>3</sub>):** δ -75.9 (d, *J* = 4.9 Hz, 6F) ppm.

**<sup>13</sup>C{<sup>1</sup>H} NMR (100 MHz, CDCl<sub>3</sub>):** δ 157.1, 140.0, 137.9, 128.9, 128.7, 127.4, 127.0, 121.1 (q, *J* = 283.2 Hz), 117.5, 76.3 (sept, *J* = 32.9 Hz) ppm.

**IR (KBr):** 3031, 2925, 1516, 1485, 1370, 1293, 1197, 1101, 899, 784, 744 cm<sup>-1</sup>.

**HRMS (DART) m/z:** ([M]) Calcd for C<sub>15</sub>H<sub>10</sub>OF<sub>6</sub> 320.06304; Found 320.06232.

Spectrum data of **3ba** were matched with the product reported in the literature.<sup>S10</sup>

#### Methyl 4-((1,1,1,3,3,3-hexafluoropropan-2-yl)oxy)benzoate (**3bb**)

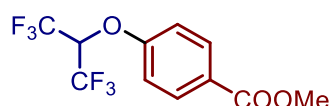

The title compound (**3bb**) was synthesized by the general procedure B using (4-methoxycarbonylphenyl)(TMP)iodonium tosylate (**2b-OTs**, 120.0 mg, 0.20 mmol). <sup>19</sup>F NMR analysis of crude mixture indicated that **3bb** was generated in 99% yield. Purification by column chromatography (SiO<sub>2</sub>, AcOEt/hexane = 1:14) afforded **3bb** in 82% yield (49.4 mg, 0.163 mmol) as a pale-yellow solid.

**Melting Point:** 51.7–52.9 °C

**<sup>1</sup>H NMR (400 MHz, CDCl<sub>3</sub>):** δ 8.06 (d, *J* = 8.8 Hz, 2H), 7.11 (d, *J* = 8.8 Hz, 2H), 4.94 (sept, *J* = 5.5 Hz, 1H), 3.91 ppm.

**<sup>19</sup>F NMR (376 MHz, CDCl<sub>3</sub>):** δ -75.8 (d, *J* = 4.9 Hz, 6F) ppm.

**<sup>13</sup>C{<sup>1</sup>H} NMR (100 MHz, CDCl<sub>3</sub>):** δ 166.0, 160.5, 132.0, 126.5, 120.9 (q, *J* = 282.4 Hz), 116.4, 75.2 (sept, *J* = 33.5 Hz), 52.2 ppm.

**IR (KBr):** 3014, 1718, 1606, 1508, 1376, 1290, 1240, 1099, 917, 745 cm<sup>-1</sup>.

**HRMS (DART) m/z:** ([M+H]<sup>+</sup>) Calcd for C<sub>11</sub>H<sub>9</sub>O<sub>3</sub>F<sub>6</sub><sup>+</sup> 303.04504; Found 303.04384.

Spectrum data of **3bb** were matched with the product reported in the literature.<sup>S10</sup>



### 1-((1,1,1,3,3,3-Hexafluoropropan-2-yl)oxy)-4-nitrobenzene (**3bc**)

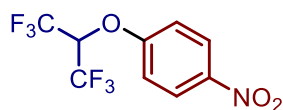

The title compound (**3bc**) was synthesized by the general procedure B using (4-nitrophenyl)(TMP)iodonium tosylate (**2c-OTs**, 117.5 mg, 0.20 mmol).  $^{19}\text{F}$  NMR analysis of crude mixture indicated that **3bc** was generated in 87% yield. Purification by column chromatography ( $\text{SiO}_2$ , AcOEt/hexane = 1:10) afforded **3bc** in 68% yield (39.4 mg, 0.136 mmol) as a pale-yellow solid.

**Melting Point:** 50.3–51.8 °C

$^1\text{H}$  NMR (400 MHz,  $\text{CDCl}_3$ ):  $\delta$  8.29 (d,  $J = 9.4$  Hz, 2H), 7.20 (d,  $J = 9.4$  Hz, 2H), 4.98 (sept,  $J = 5.5$  Hz, 1H) ppm.

$^{19}\text{F}$  NMR (376 MHz,  $\text{CDCl}_3$ ):  $\delta$  -75.6 (d,  $J = 7.3$  Hz, 6F) ppm.

$^{13}\text{C}\{^1\text{H}\}$  NMR (100 MHz,  $\text{CDCl}_3$ ):  $\delta$  161.2, 144.2, 126.2, 120.6 (q,  $J = 283.2$  Hz), 116.9, 75.1 (sept,  $J = 33.8$  Hz) ppm.

IR (KBr): 3018, 1730, 1597, 1524, 1427, 1349, 1221, 1109, 911, 774, 744  $\text{cm}^{-1}$ .

HRMS (DART)  $m/z$ : ( $[\text{M}+\text{H}]^+$ ) Calcd for  $\text{C}_9\text{H}_6\text{NO}_3\text{F}_6^+$  290.02464; Found 290.02374.

Spectrum data of **3bc** were matched with the product reported in the literature.<sup>S9</sup>

### 4-((1,1,1,3,3,3-Hexafluoropropan-2-yl)oxy)benzonitrile (**3bd**)

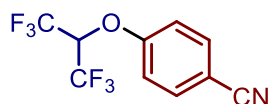

The title compound (**3bd**) was synthesized by the general procedure B using (4-cyanophenyl)(TMP)iodonium tosylate (**2d-OTs**, 113.5 mg, 0.20 mmol).  $^{19}\text{F}$  NMR analysis of crude mixture indicated that **3bd** was generated in 87% yield. Purification by column chromatography ( $\text{SiO}_2$ , AcOEt/hexane = 1:30) afforded **3bd** in 62% yield (33.4 mg, 0.124

mmol) as a colorless solid.

**Melting Point:** 90.3–91.9 °C

**<sup>1</sup>H NMR (400 MHz, CDCl<sub>3</sub>):** δ 7.70 (d, *J* = 9.0 Hz, 2H), 7.17 (d, *J* = 9.0 Hz, 2H), 4.94 (sept, *J* = 5.5 Hz, 1H) ppm.

**<sup>19</sup>F NMR (376 MHz, CDCl<sub>3</sub>):** δ -75.7 (d, *J* = 4.9 Hz, 6F) ppm.

**<sup>13</sup>C{<sup>1</sup>H} NMR (100 MHz, CDCl<sub>3</sub>):** δ 159.9, 134.5, 120.7 (q, *J* = 283.2 Hz), 117.9, 117.4, 108.5, 75.1 (sept, *J* = 33.8 Hz) ppm.

**IR (KBr):** 3021, 2251, 1732, 1602, 1511, 1422, 1227, 1019, 909, 722 cm<sup>-1</sup>.

**HRMS (DART) m/z:** ([M+H]<sup>+</sup>) Calcd for C<sub>10</sub>H<sub>6</sub>NOF<sub>6</sub><sup>+</sup> 270.03481; Found 270.03401.

#### 1-Bromo-4-((1,1,1,3,3,3-hexafluoropropan-2-yl)oxy)benzene (**3bf**)

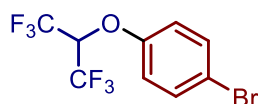

The title compound (**3bf**) was synthesized by the general procedure B using (4-bromophenyl)(TMP)iodonium tosylate (**2f-OTs**, 124.3 mg, 0.20 mmol). <sup>19</sup>F NMR analysis of crude mixture indicated that **3bf** was generated in 91% yield. Purification by column chromatography (SiO<sub>2</sub>, hexane) afforded **3bf** in 59% yield (37.8 mg, 0.117 mmol) as a colorless oil.

**<sup>1</sup>H NMR (400 MHz, CDCl<sub>3</sub>):** δ 7.48 (d, *J* = 9.0 Hz, 2H), 6.98 (d, *J* = 9.0 Hz, 2H), 4.73 (sept, *J* = 5.7 Hz, 1H) ppm.

**<sup>19</sup>F NMR (376 MHz, CDCl<sub>3</sub>):** δ -75.9 (d, *J* = 7.3 Hz, 6F) ppm.

**<sup>13</sup>C{<sup>1</sup>H} NMR (100 MHz, CDCl<sub>3</sub>):** δ 156.6, 133.1, 120.9 (q, *J* = 282.3 Hz), 119.1, 117.5, 76.4 (sept, *J* = 33.7 Hz) ppm.

**IR (KBr):** 3021, 1520, 1486, 1371, 1200, 1106, 1011, 911, 796, 741 cm<sup>-1</sup>.

**HRMS (DART) m/z:** ([M]) Calcd for C<sub>9</sub>H<sub>5</sub>OF<sub>6</sub>Br<sup>+</sup> 321.94225; Found 321.94214.

Spectrum data of **3be** were matched with the product reported in the literature.<sup>S10</sup>

**1-((1,1,1,3,3,3-Hexafluoropropan-2-yl)oxy)-4-*tert*-butylbenzene (3bh)**

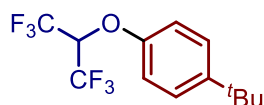

The title compound (**3bh**) was synthesized by the general procedure B using (4-*tert*-butylphenyl)(TMP)iodonium tosylate (**2h-OTs**, 119.7 mg, 0.20 mmol). Purification by column chromatography (SiO<sub>2</sub>, hexane) afforded **3bh** in 82% yield (49.3 mg, 0.164 mmol) as a colorless oil.

**<sup>1</sup>H NMR (400 MHz, CDCl<sub>3</sub>):**  $\delta$  7.37 (d,  $J$  = 8.8 Hz, 2H), 7.01 (d,  $J$  = 8.8 Hz, 2H), 4.77 (sept,  $J$  = 5.7 Hz, 1H), 1.32 (s, 9H) ppm.

**<sup>19</sup>F NMR (376 MHz, CDCl<sub>3</sub>):**  $\delta$  -76.0 (d,  $J$  = 4.5 Hz, 6F) ppm.

**<sup>13</sup>C{<sup>1</sup>H} NMR (100 MHz, CDCl<sub>3</sub>):**  $\delta$  155.5, 147.6, 126.9, 121.2 (q,  $J$  = 283.3 Hz), 116.7, 76.7 (sept,  $J$  = 32.9 Hz), 34.4, 31.4 ppm.

**IR (KBr):** 2967, 1731, 1607, 1512, 1425, 1371, 1223, 1108, 907, 780, 765 cm<sup>-1</sup>.

Spectrum data of **3bh** were matched with the product reported in the literature.<sup>S10</sup>

**1-((1,1,1,3,3,3-Hexafluoropropan-2-yl)oxy)-3-isobutoxybenzene (3bk)**

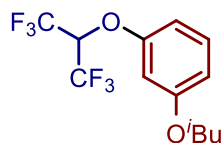

The title compound (**3bk**) was synthesized by the general procedure B using (3-isobutoxyphenyl)(TMP)iodonium tosylate (**2k-OTs**, 122.9 mg, 0.20 mmol). Purification by column chromatography (SiO<sub>2</sub>, hexane) afforded **3bk** in 86% yield (54.7 mg, 0.173 mmol) as a colorless oil.

**<sup>1</sup>H NMR (400 MHz, CDCl<sub>3</sub>):**  $\delta$  7.26 (t,  $J$  = 8.6 Hz, 1H), 6.75–6.71 (m, 1H), 6.68–6.65 (m, 2H), 4.85 (sept,  $J$  = 5.8 Hz, 1H), 3.74 (d,  $J$  = 6.0 Hz, 2H), 2.11 (sept,  $J$  = 6.7 Hz, 1H), 1.06 (d,  $J$  =

6.8 Hz, 6H) ppm.

<sup>19</sup>F NMR (376 MHz, CDCl<sub>3</sub>): δ -75.9 (d, *J* = 4.9 Hz, 6F) ppm.

<sup>13</sup>C{<sup>1</sup>H} NMR (100 MHz, CDCl<sub>3</sub>): δ 160.7, 158.6, 130.4, 121.1 (q, *J* = 279.1 Hz), 110.6, 108.4, 104.3, 76.0 (sept, *J* = 32.9 Hz), 74.6, 28.2, 19.2 ppm.

IR (KBr): 2964, 1605, 1492, 1370, 1230, 1197, 1106, 1035, 913, 744 cm<sup>-1</sup>.

HRMS (DART) *m/z*: ([M+H]<sup>+</sup>) Calcd for C<sub>13</sub>H<sub>15</sub>O<sub>2</sub>F<sub>6</sub><sup>+</sup> 317.09708; Found 317.09588.

### 2-Chloro-5-((1,1,1,3,3,3-hexafluoropropan-2-yl)oxy)pyridine (3bl)

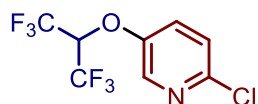

The title compound (**3bl**) was synthesized by the general procedure B using (6-chloropyridin-3-yl)(TMP)iodonium tosylate (**21-OTs**, 115.6 mg, 0.20 mmol). <sup>19</sup>F NMR analysis of crude mixture indicated that **3bl** was generated in 79% yield. Purification by column chromatography (SiO<sub>2</sub>, AcOEt/hexane = 1:20) afforded **3bl** in 50% yield (27.7 mg, 0.099 mmol) as a colorless oil.

<sup>1</sup>H NMR (400 MHz, CDCl<sub>3</sub>): δ 8.26 (d, *J* = 3.2 Hz, 1H), 7.41 (dd, *J* = 8.8, 3.2 Hz, 1H), 7.34 (d, *J* = 8.8 Hz, 1H), 4.74 (sept, *J* = 5.5 Hz, 1H) ppm.

<sup>19</sup>F NMR (376 MHz, CDCl<sub>3</sub>): δ -75.8 (d, *J* = 4.9 Hz, 6F) ppm.

<sup>13</sup>C{<sup>1</sup>H} NMR (100 MHz, CDCl<sub>3</sub>): δ 153.1, 147.0, 139.8, 128.0, 125.2, 120.7 (q, *J* = 282.9 Hz), 76.1 (sept, *J* = 33.6 Hz) ppm.

IR (KBr): 3018, 1578, 1460, 1369, 1298, 1232, 1107, 1018, 923, 831, 738, 690 cm<sup>-1</sup>.

HRMS (DART) *m/z*: ([M+H]<sup>+</sup>) Calcd for C<sub>8</sub>H<sub>5</sub>NOF<sub>6</sub>Cl<sup>+</sup> 279.99584; Found 279.99484.

### 4-((1,1,1,3,3,3-Hexafluoro-2-phenylpropan-2-yl)oxy)-1,1'-biphenyl (3ca)

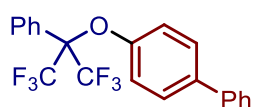

The title compound (**3ca**) was synthesized by the general procedure C using 1,1,1,3,3,3-hexafluoro-2-phenylpropan-2-ol (976.5 mg, 4.0 mmol). Purification by column chromatography (SiO<sub>2</sub>, hexane) afforded **3ca** in 66% yield (129.9mg, 0.328 mmol) as a colorless oil.

**<sup>1</sup>H NMR (400 MHz, CDCl<sub>3</sub>):** δ 7.74 (d, *J* = 7.2 Hz, 2H), 7.58-7.51 (m, 4H), 7.51 (t, *J* = 6.4 Hz, 1H), 7.43 (t, *J* = 7.2 Hz, 2H), 7.43 (d, *J* = 8.8 Hz, 2H), 7.34 (t, *J* = 7.4 Hz, 1H) 6.93 (d, *J* = 8.8 Hz, 2H) ppm.

**<sup>19</sup>F NMR (376 MHz, CDCl<sub>3</sub>):** δ -70.4 (s, 6F) ppm.

**<sup>13</sup>C{<sup>1</sup>H} NMR (100 MHz, CDCl<sub>3</sub>):** δ 153.1, 140.1, 136.7, 130.5, 128.8, 128.6, 128.4–128.3 (m), 128.2, 127.2, 126.8, 126.6, 122.3 (q, *J* = 288.1 Hz), 119.8, 84.2 (sept, *J* = 28.8 Hz) ppm.

**IR (KBr):** 3020, 1605, 1516, 1477, 1423, 1220, 1112, 1030, 909, 768, 672 cm<sup>-1</sup>.

**HRMS (DART) m/z:** ([M]) Calcd for C<sub>21</sub>H<sub>14</sub>OF<sub>6</sub> 396.09434; Found 396.09455.

#### 4-((1,1,1,3,3,3-Hexafluoro-2-(trifluoromethyl)propan-2-yl)oxy)-1,1'-biphenyl (**3da**)

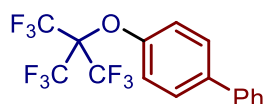

The title compound (**3da**) was synthesized by the general procedure C using 1,1,1,3,3,3-hexafluoro-2-(trifluoromethyl)propan-2-ol (944.1 mg, 4.0 mmol). Purification by column chromatography (SiO<sub>2</sub>, hexane) afforded **3da** in 38% yield (72.9 mg, 0.188 mmol) as a colorless solid.

**Melting Point:** 75.1–77.1 °C

**<sup>1</sup>H NMR (400 MHz, CDCl<sub>3</sub>):** δ 7.58 (d, *J* = 8.0 Hz, 2H), 7.57 (d, *J* = 8.8 Hz, 2H), 7.46 (t, *J* = 8.0 Hz, 2H), 7.38 (t, *J* = 7.2 Hz, 1H), 7.29 (d, *J* = 8.0 Hz, 2H) ppm.

**<sup>19</sup>F NMR (376 MHz, CDCl<sub>3</sub>):** δ -69.3 (s, 9F) ppm.

**<sup>13</sup>C{<sup>1</sup>H, <sup>19</sup>F} NMR (125 MHz, CDCl<sub>3</sub>):** δ 152.2, 139.8, 139.7, 128.9, 128.1, 127.7, 127.1, 123.0, 120.0, 81.3 ppm.

**IR (KBr):** 3022, 2925, 1731, 1604, 1516, 1486, 1297, 1221, 1110, 1001, 971, 849, 768  $\text{cm}^{-1}$ .

Spectrum data of **3da** were matched with the product reported in the literature.<sup>S11</sup>

**4-((2,2,3,3,4,4,5,5,6,6,6-Undecafluorohexyl)oxy)-1,1'-biphenyl (3ea)**

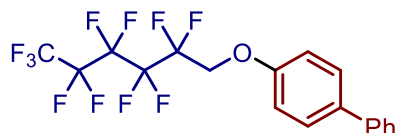

The title compound (**3ea**) was synthesized by the general procedure C using 1,1,1,3,3,3-hexafluoro-2-(trifluoromethyl)propan-2-ol (1.20 g, 4.0 mmol). Purification by column chromatography ( $\text{SiO}_2$ , hexane) afforded **3ea** in 84% yield (189.8 mg, 0.420 mmol) as a colorless solid.

**Melting Point:** 90.4–92.4  $^{\circ}\text{C}$

**$^1\text{H}$  NMR (400 MHz,  $\text{CDCl}_3$ ):**  $\delta$  7.59 (d,  $J = 8.4$  Hz, 4H), 7.47 (t,  $J = 7.8$  Hz, 2H), 7.38 (t,  $J = 7.2$  Hz, 1H), 7.06 (d,  $J = 8.8$  Hz, 2H), 4.54 (t,  $J = 12.8$  Hz, 2H) ppm.

**$^{19}\text{F}$  NMR (376 MHz,  $\text{CDCl}_3$ ):**  $\delta$  -83.1 (t,  $J = 9.8$  Hz, 3F), -121.7–-121.9 (m, 2F), -125.1–-125.3 (m, 2F), -125.6–-125.7 (m, 2F), -128.4–-128.6 (m, 2F) ppm.

**$^{13}\text{C}\{^1\text{H}, ^{19}\text{F}\}$  NMR (125 MHz,  $\text{CDCl}_3$ ):**  $\delta$  156.9, 140.3, 135.8, 128.8, 128.4, 127.1, 126.8, 117.2, 115.2, 114.9, 111.0, 110.4, 108.5, 65.4 ppm.

**IR (KBr):** 3024, 1731, 1602, 1520, 1422, 1221, 1111, 1019, 929, 733, 673  $\text{cm}^{-1}$ .

**HRMS (DART)  $m/z$ :** ( $[\text{M}+\text{H}]^+$ ) Calcd for  $\text{C}_{18}\text{H}_{12}\text{OF}_{11}^+$  453.07070; Found 453.07030.

## 5. Trifluoroethoxylation of (4-bromomethylphenyl)(TMP)iodonium tosylate

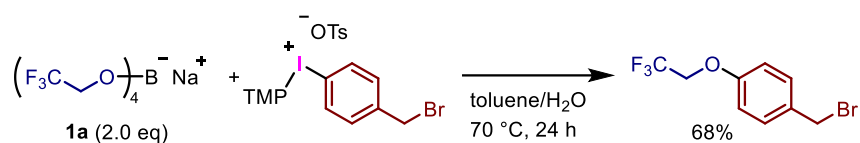

**Scheme S1.** Reaction of **1a** with (4-bromomethylphenyl)(TMP)iodonium tosylate

The reaction was carried out according to the general procedure A using (4-bromomethylphenyl)(TMP)iodonium tosylate (127.1 mg, 0.20 mmol).  $^{19}\text{F}$  NMR analysis of crude mixture indicated that 4-(2,2,2-trifluoroethoxy)benzyl bromide was generated in 68% yield. In this reaction,  $\text{S}_{\text{N}}2$  reaction with the bromine atom did not proceed.

## 6. NMR monitoring of trifluoroethoxylation of **2f-OTs-TMP** (Fig. 5c)

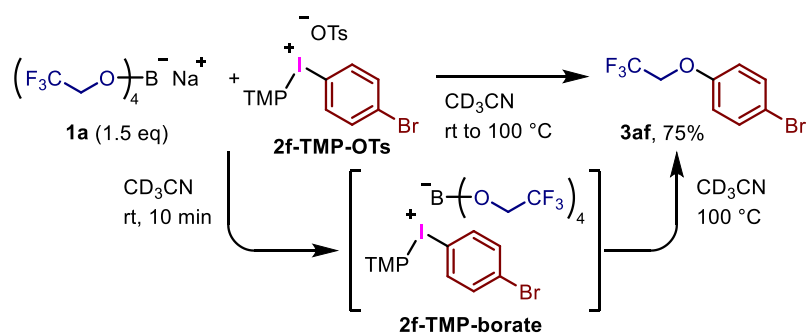

A well-dried NMR tube with a J. Young valve was charged with sodium tetrakis(2,2,2-trifluoroethoxy)borate (**1a**, 12.8 mg, 0.030 mmol), (4-bromophenyl)(TMP)iodonium tosylate (**2f-TMP-OTs**, 12.8 mg, 0.020 mmol), and  $\text{CD}_3\text{CN}$  (0.75 mL). After stored at room temperature for 10 minutes, the reaction mixture was analyzed by  $^1\text{H}$  NMR spectroscopy. The disappearance of the peak corresponding tosyl group was confirmed, which indicates the consumption of **2f-TMP-OTs** and the generation of **2f-TMP-borate** via ligand exchange (Fig. S1a vs b). The reaction mixture was stored at  $100\text{ }^\circ\text{C}$  using an oil bath.  $^1\text{H}$  and  $^{19}\text{F}$  NMR analysis of the reaction mixture indicated the generation of **3af** in 75%.

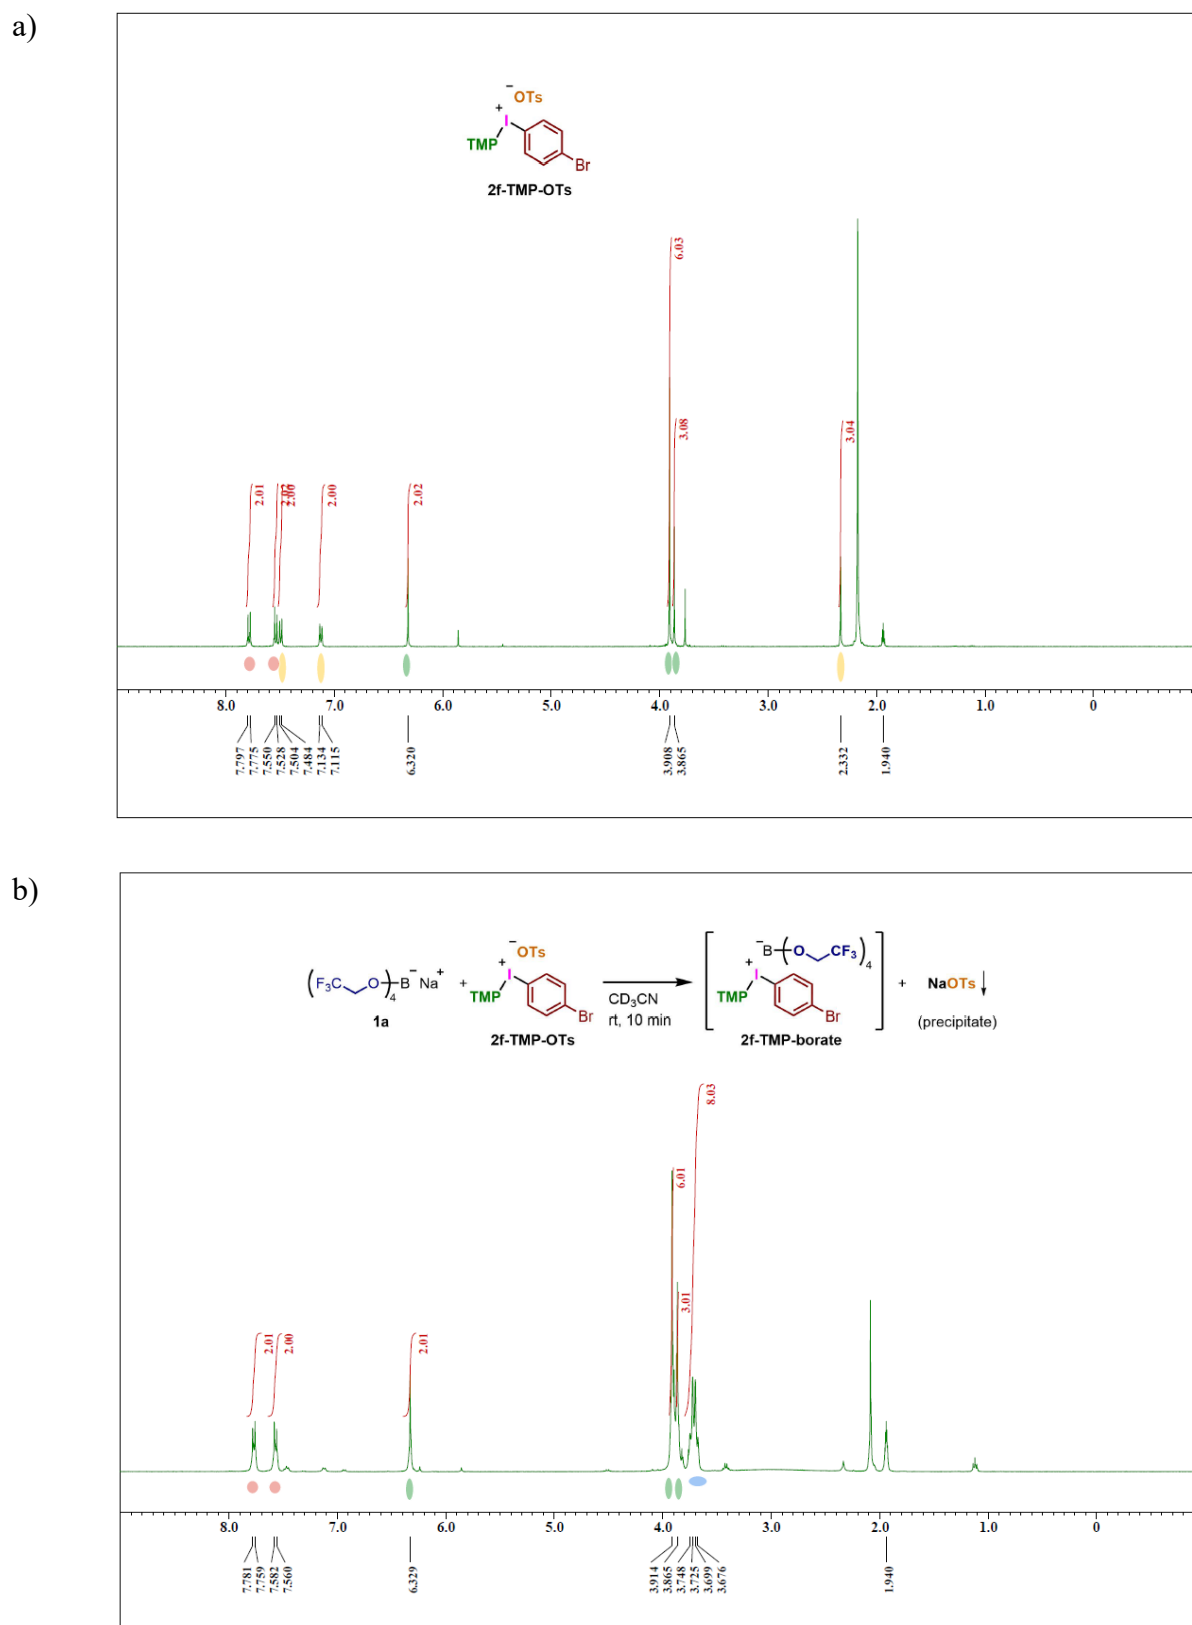

**Fig. S1.** a)  $^1H$  NMR spectrum of **2f-TMP-OTs** in  $CD_3CN$ .

b)  $^1H$  NMR spectrum of in situ generated **2f-TMP-borate** in  $CD_3CN$ .



## 7. References

- S1. B. Pethő, M. Zwillinger, J. T. Csenki, A. E. Káncz, B. Krámos, J. Müller, G. T. Balogh and Z. Novák, *Chem. Eur. J.*, 2017, **23**, 15628.
- S2. M. Kaliner, A. Rupp, I. Krossing, T. Strassner, *Chem. Eur. J.*, 2016, **22**, 10044.
- S3. (a) K. Kikushima, K. Yamada, N. Umekawa, N. Yosio, Y. Kita and T. Dohi, *Green Chem.*, 2023, **25**, 1790; (b) K. Kikushima, K. Komiyama, N. Umekawa, K. Yamada, Y. Kita and T. Dohi, *Org. Lett.*, 2024, **26**, 5347.
- S4. T. L. Seidl, S. K. Sundalam, B. McCullough and D. R. Stuart, *J. Org. Chem.*, 2016, **81**, 1998.
- S5. R. Huang, Y. Huang, X. Lin, M. Rong and Z. Weng, *Angew. Chem. Int. Ed.*, 2015, **54**, 5736.
- S6. K. Zhang, X.-H. Xu and F.-L. Qing, *J. Fluorine Chem.*, 2017, **196**, 24.
- S7. R. T. Gallagher, S. Jha, B. E. Metze and D. R. Stuart, *Synlett*, 2024, **35**, 889.
- S8. B. Pethő, M. Zwillinger, J. T. Csenki, A. E. Káncz, B. Krámos, J. Müller, G. T. Balogh and Z. Novák, *Chem. –Eur. J.*, 2017, **23**, 15628
- S9. I. Tejero, I. Huertas, À. González-Lafont, J. M. Lluch and J. Marquet, *J. Org. Chem.*, 2005, **70**, 1718.
- S10. J. Su, K. Chen, Q.-K. Kang and H. Shi, *Angew. Chem. Int. Ed.*, 2023, **62**, e202302908.
- S11. H. Meng, L. Wen, Z. Xu, Y. Li, J. Hao and Y. Zhao, *Org. Lett.*, 2019, **21**, 5206.

## 8. NMR spectra

Sodium tetrakis(2,2,2-trifluoroethoxy)borate (1a)

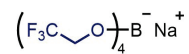

$^1\text{H}$  NMR (400 MHz,  $\text{CDCl}_3$ )

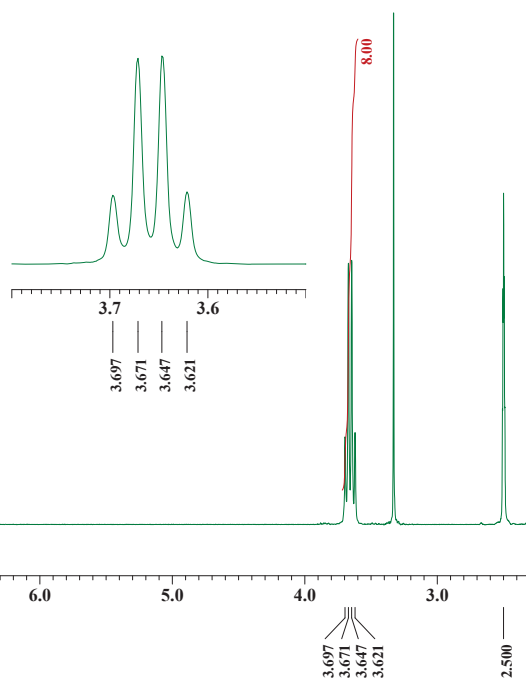

26

Sodium tetrakis(2,2,2-trifluoroethoxy)borate (1a)

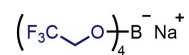

$^{19}\text{F}$  NMR (376 MHz,  $\text{CDCl}_3$ )

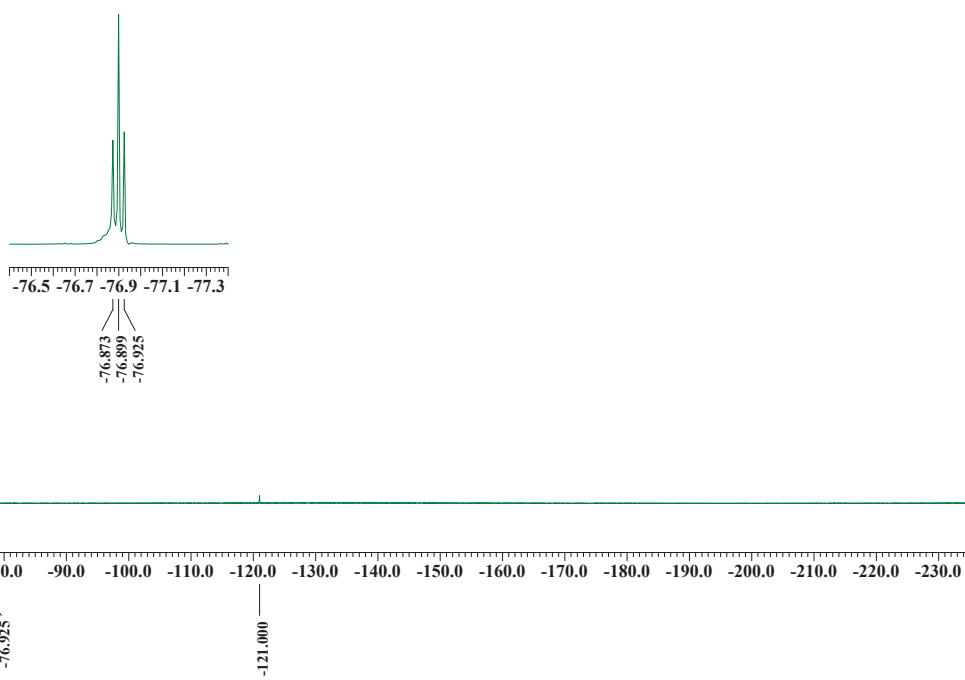

Sodium tetrakis(2,2,2-trifluoroethoxy)borate (1a)

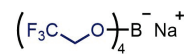

$^{13}\text{C}\{^1\text{H}\}$  NMR (100 MHz,  $\text{CDCl}_3$ )

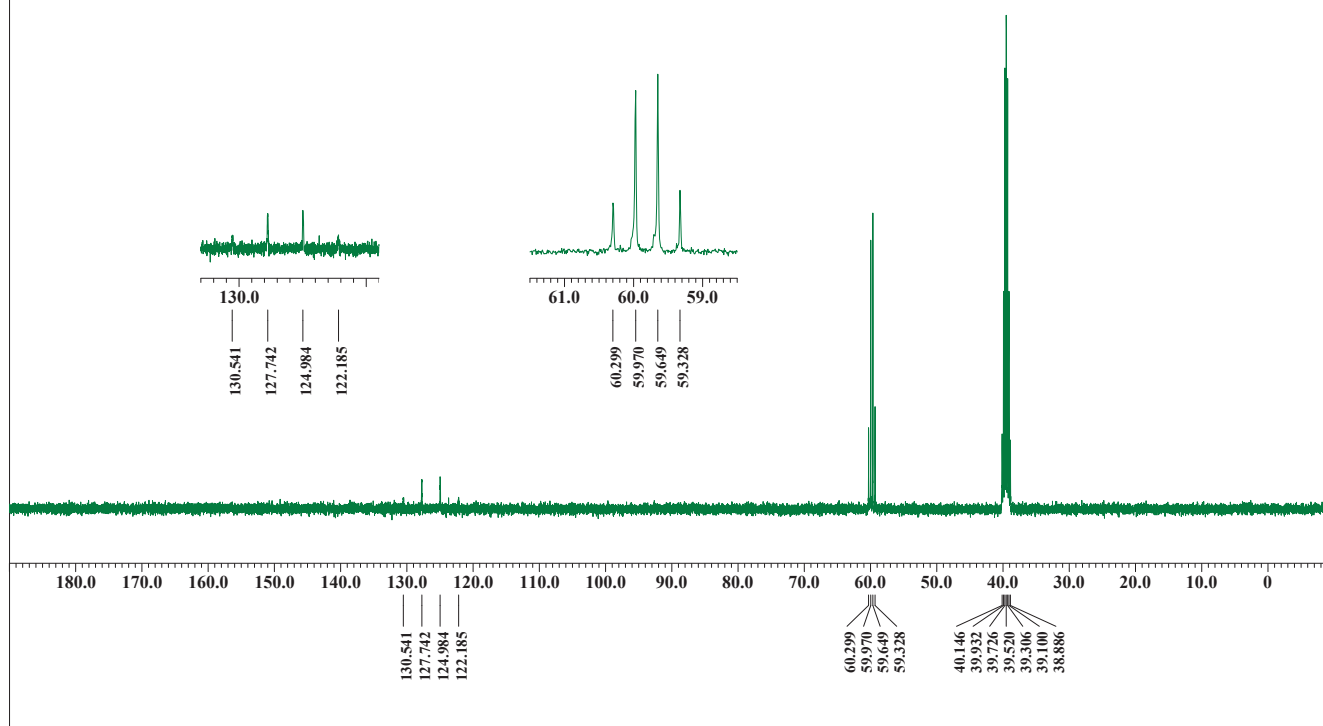

Sodium tetrakis(1,1,1,3,3,3-hexafluoroisopropoxy)borate DME complex ( $1\text{b}\cdot(\text{DME})_3$ )

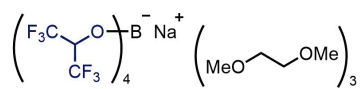

$^1\text{H}$  NMR (400 MHz,  $\text{CDCl}_3$ )

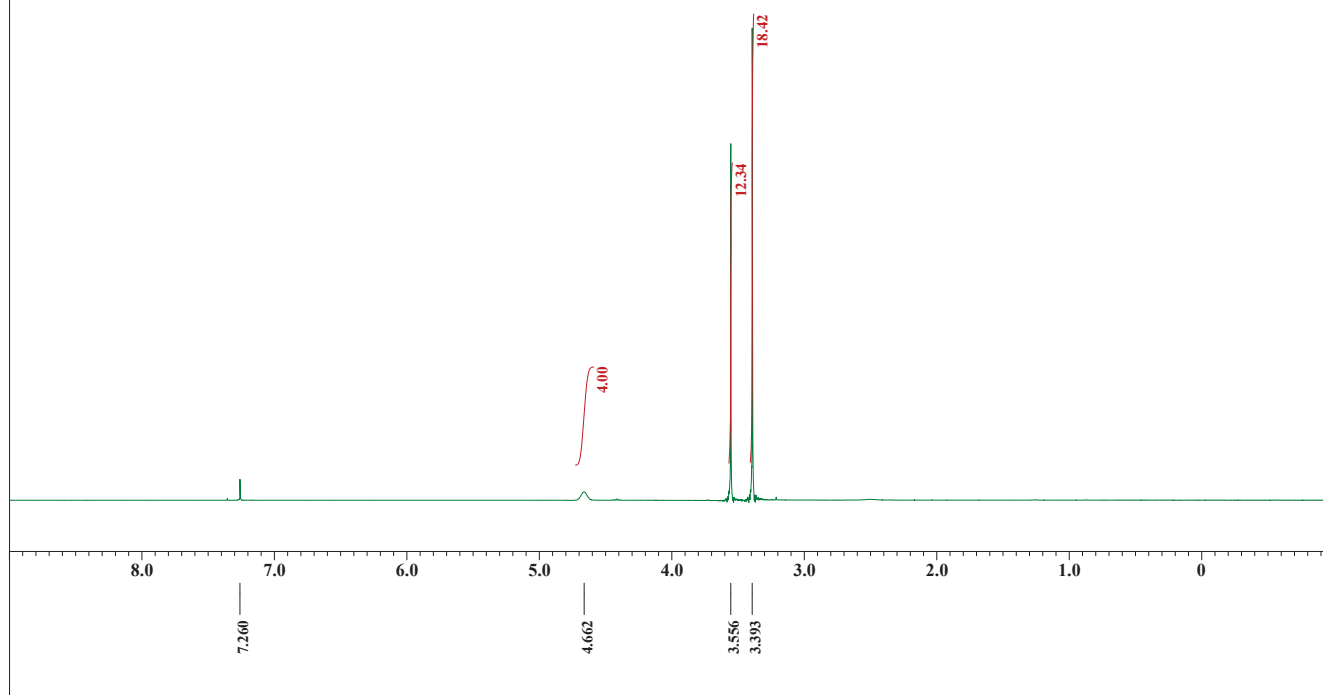

Sodium tetrakis(1,1,1,3,3,3-hexafluoroisopropoxy)borate DME complex ( $1b \cdot (DME)_3$ )

$^{19}F$  NMR (376 MHz,  $CDCl_3$ )

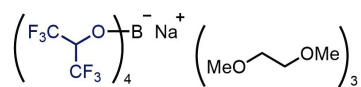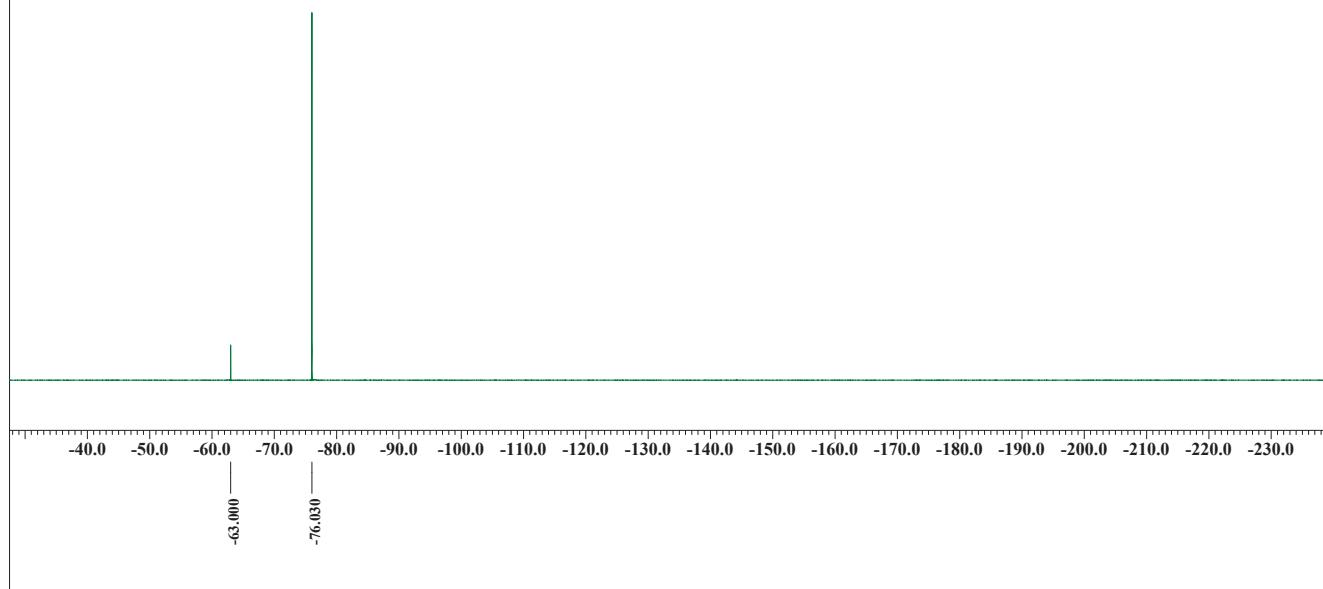

Sodium tetrakis(1,1,1,3,3,3-hexafluoroisopropoxy)borate DME complex ( $1b \cdot (DME)_3$ )

$^{13}C\{^1H\}$  NMR (100 MHz,  $CDCl_3$ )

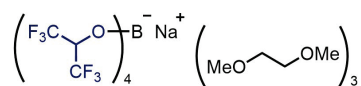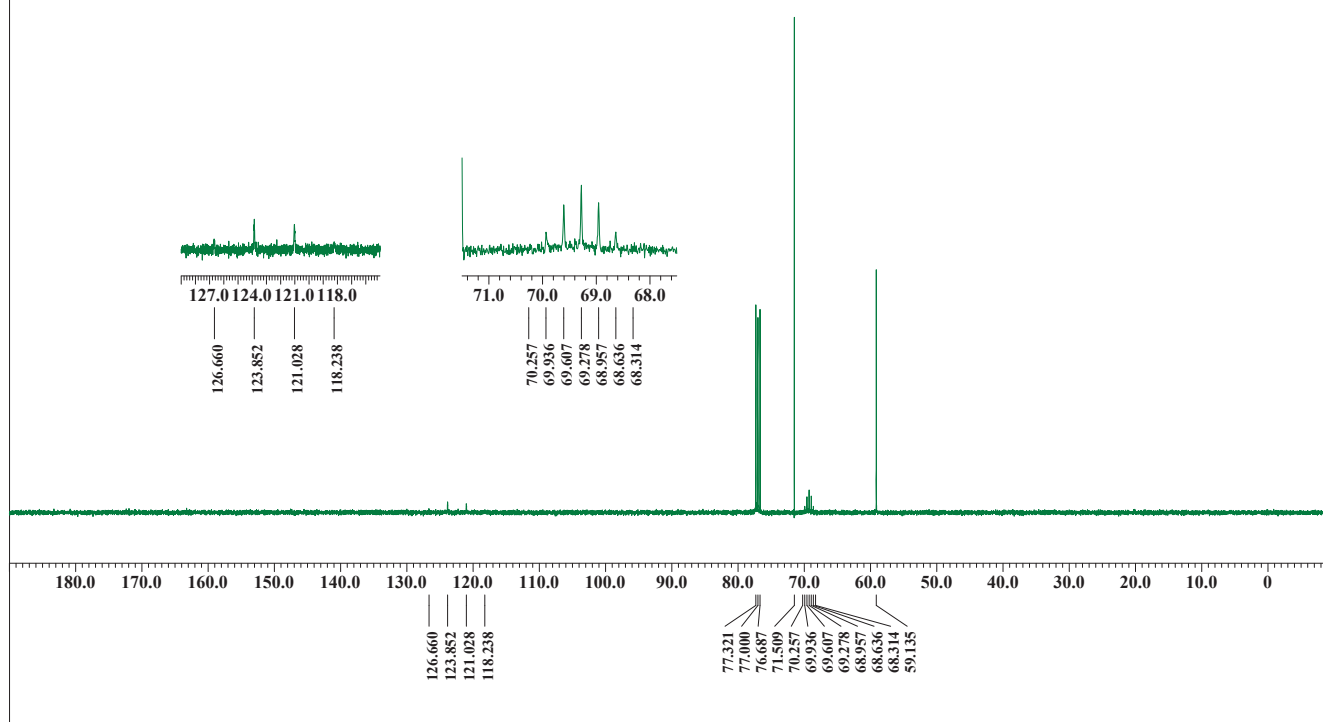

4-(2,2,2-Trifluoroethoxy)-1,1'-biphenyl (3aa)

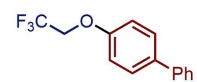

$^1\text{H}$  NMR (400 MHz,  $\text{CDCl}_3$ )

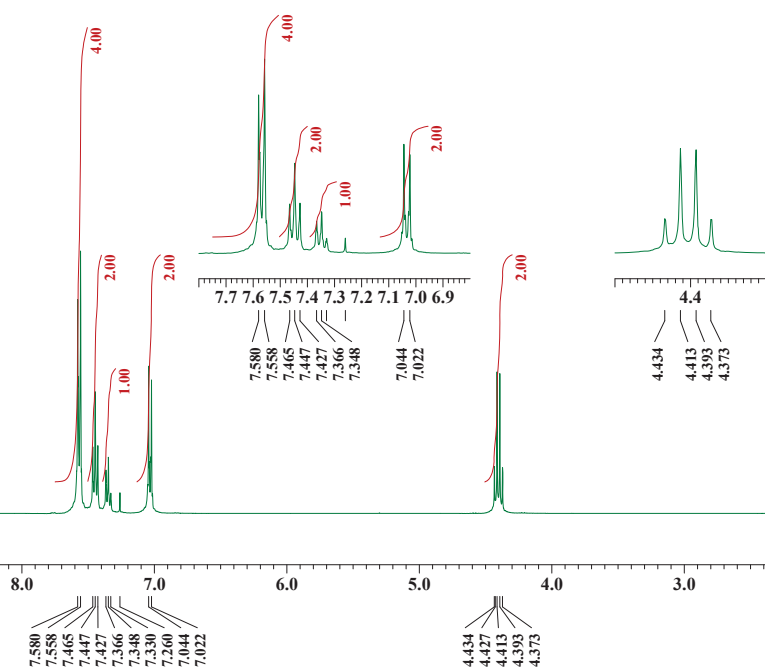

4-(2,2,2-Trifluoroethoxy)-1,1'-biphenyl (3aa)

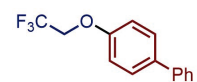

$^{19}\text{F}$  NMR (376 MHz,  $\text{CDCl}_3$ )

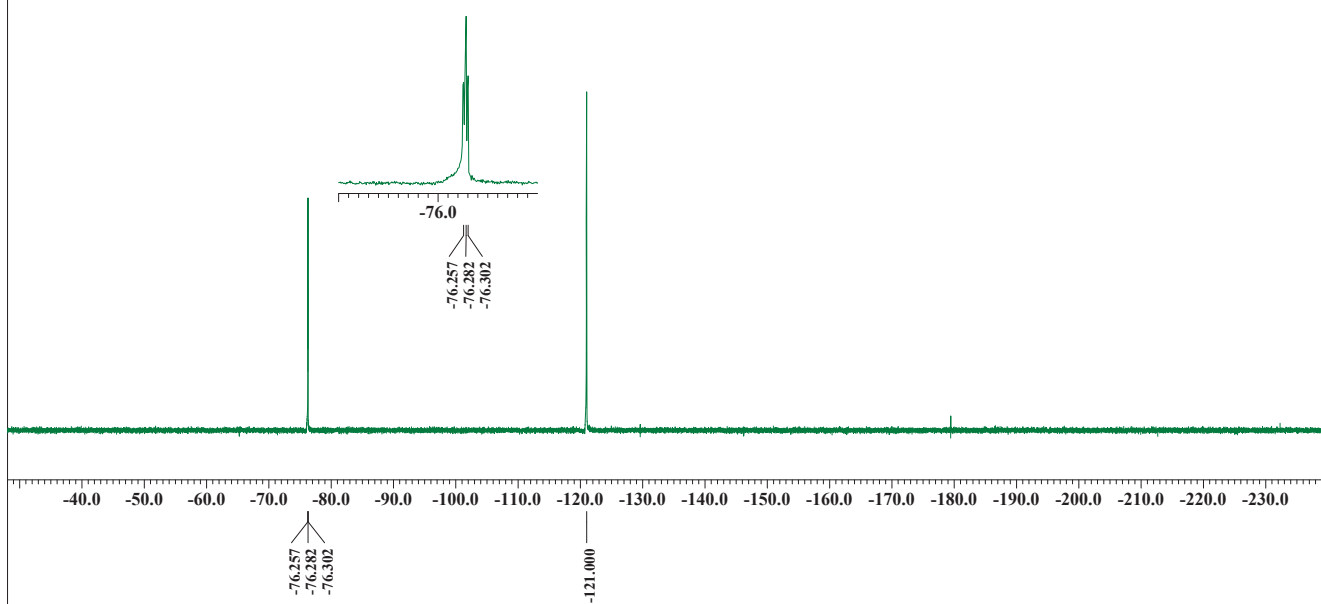

4-(2,2,2-Trifluoroethoxy)-1,1'-biphenyl (3aa)

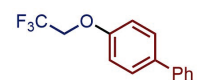

$^{13}\text{C}\{^1\text{H}\}$  NMR (100 MHz,  $\text{CDCl}_3$ )

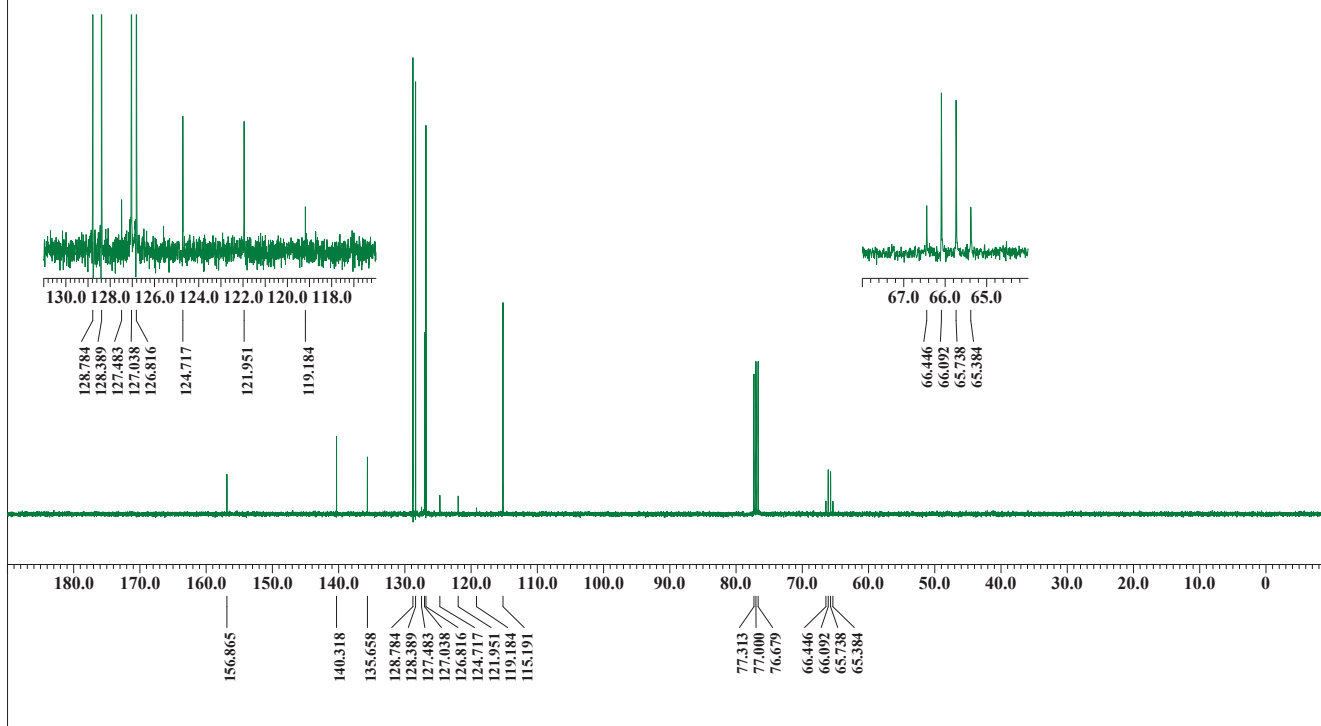

Methyl 4-(2,2,2-trifluoroethoxy)benzoate (3ab)

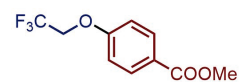

$^1\text{H}$  NMR (400 MHz,  $\text{CDCl}_3$ )

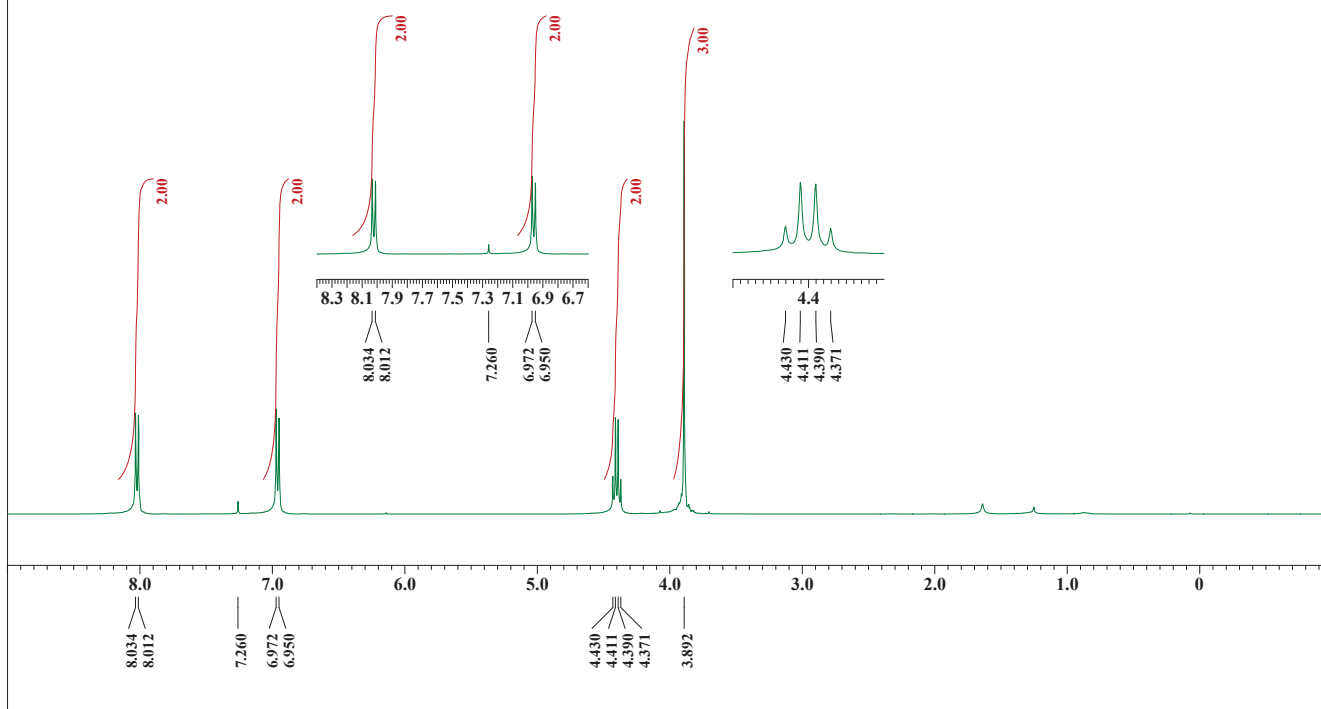

Methyl 4-(2,2,2-trifluoroethoxy)benzoate (3ab)

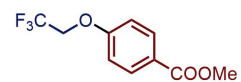

$^{19}\text{F}$  NMR (376 MHz,  $\text{CDCl}_3$ )

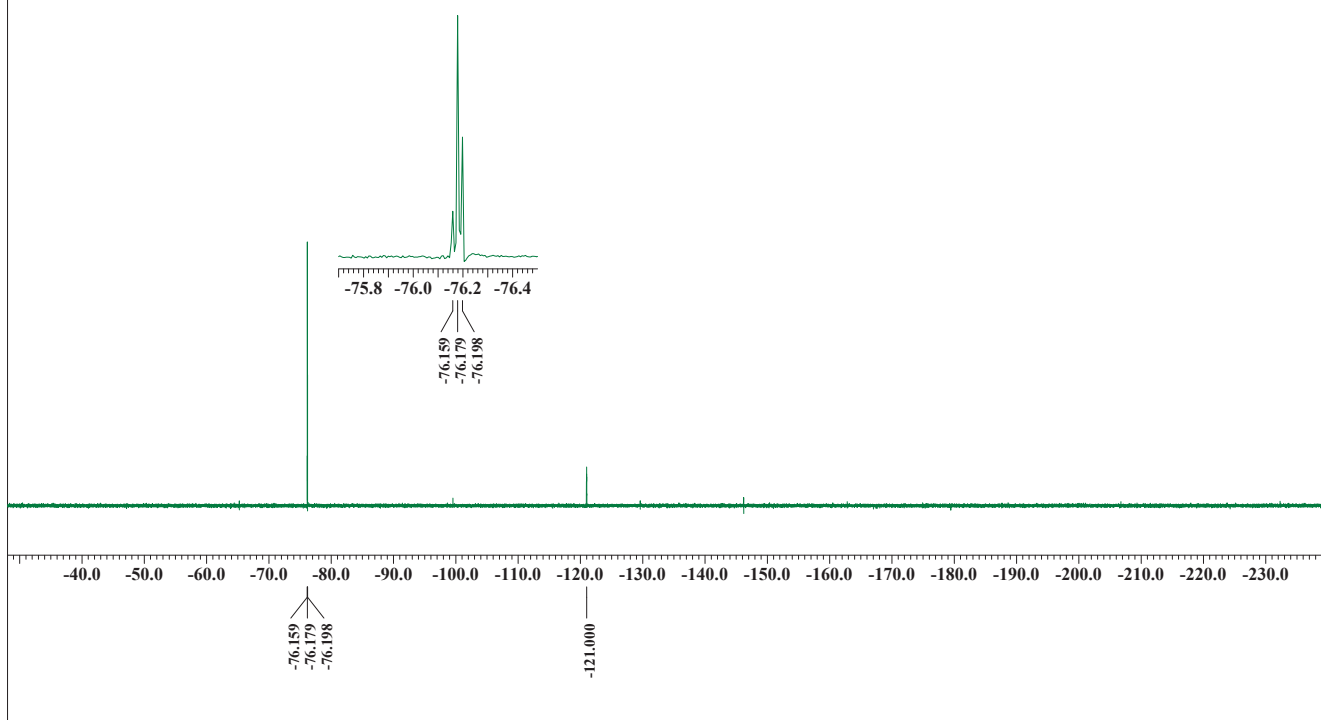

Methyl 4-(2,2,2-trifluoroethoxy)benzoate (3ab)



$^{13}\text{C}\{^1\text{H}\}$  NMR (100 MHz,  $\text{CDCl}_3$ )

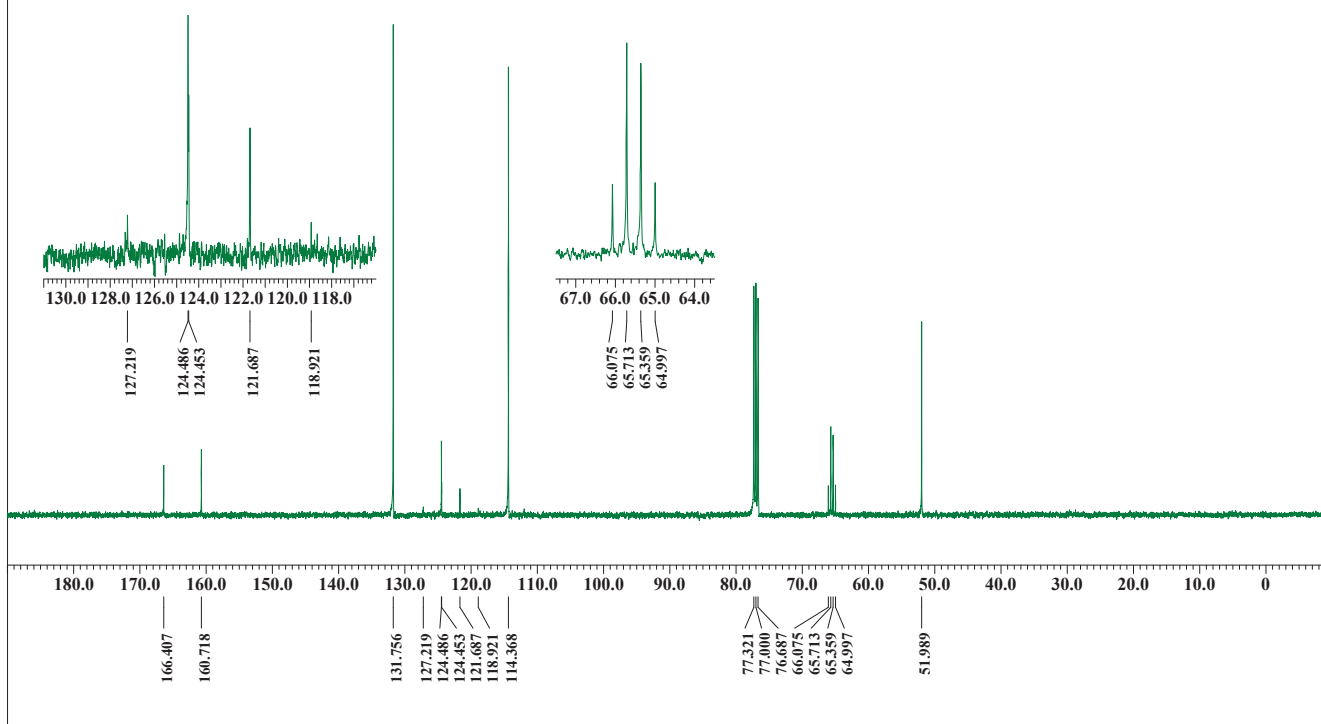

1-Nitro-4-(2,2,2-trifluoroethoxy)benzene (3ac)

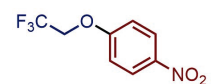

$^1\text{H}$  NMR (400 MHz,  $\text{CDCl}_3$ )

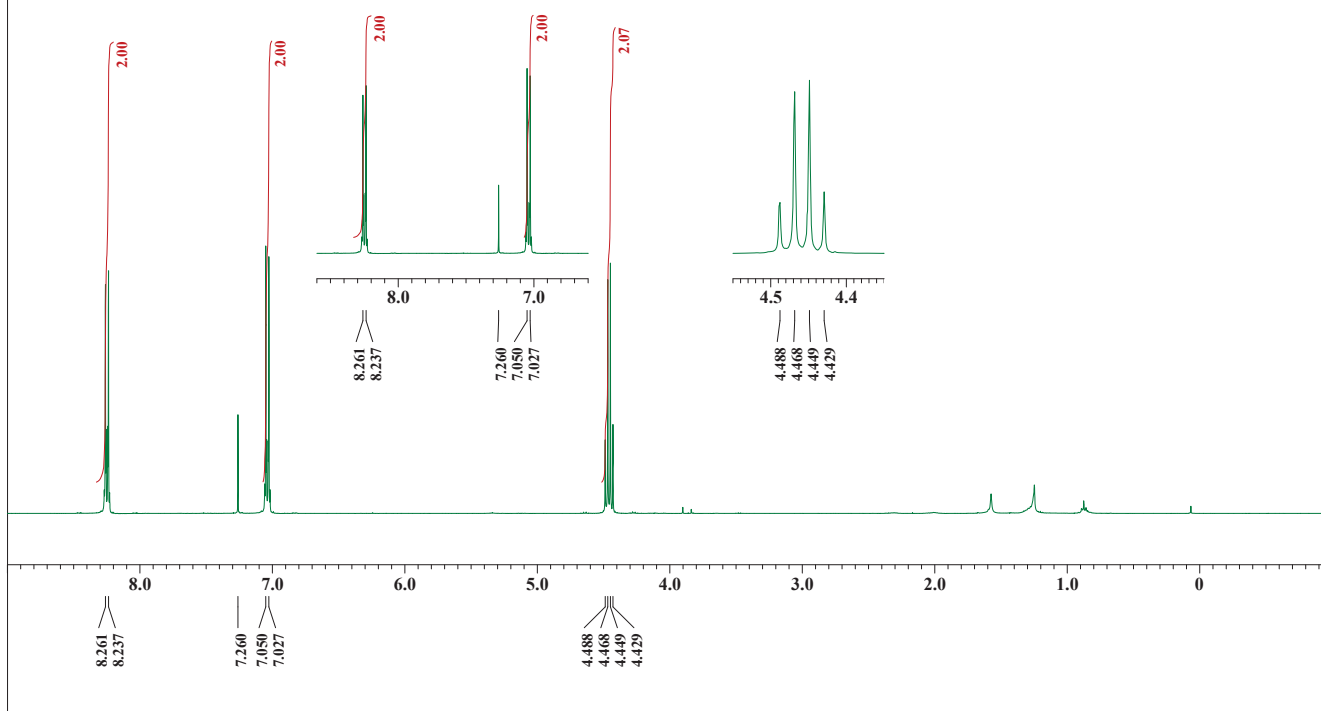

1-Nitro-4-(2,2,2-trifluoroethoxy)benzene (3ac)

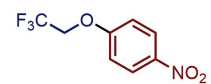

$^{19}\text{F}$  NMR (376 MHz,  $\text{CDCl}_3$ )

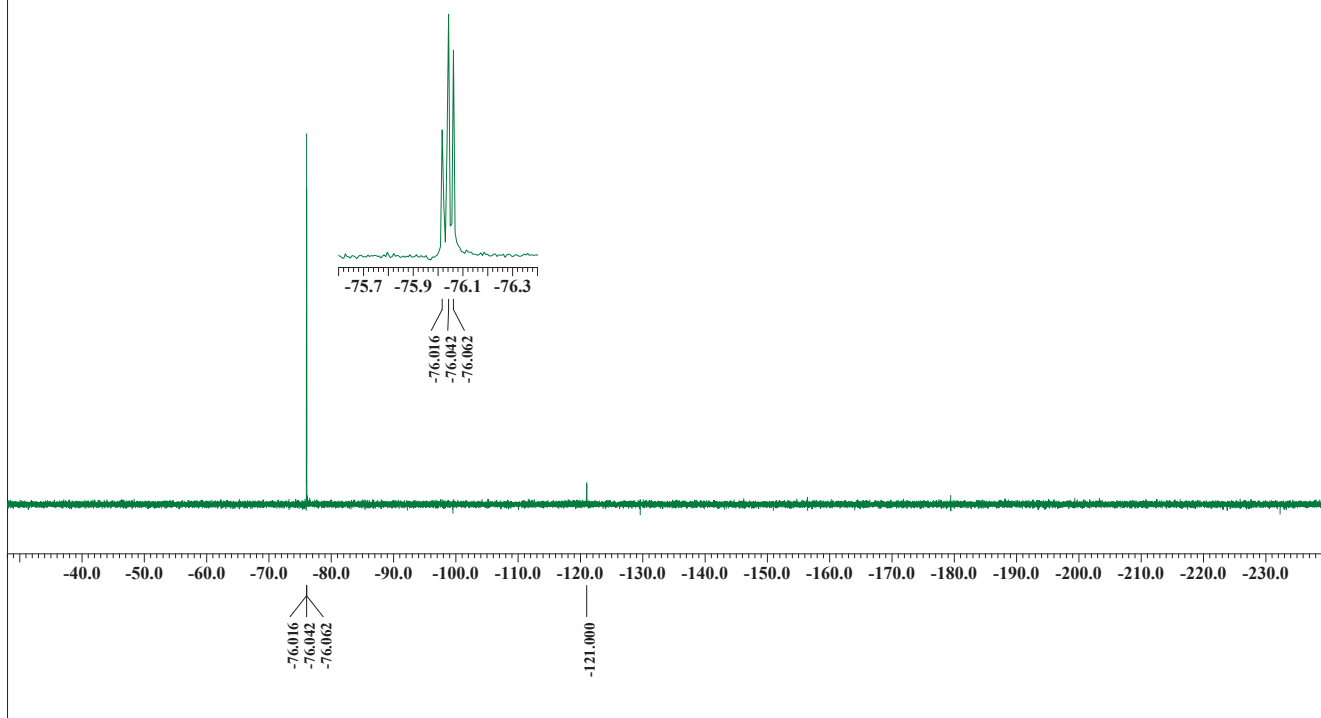



1-Nitro-4-(2,2,2-trifluoroethoxy)benzene (3ac)

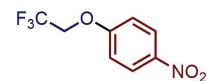

$^{13}\text{C}\{^1\text{H}\}$  NMR (100 MHz,  $\text{CDCl}_3$ )

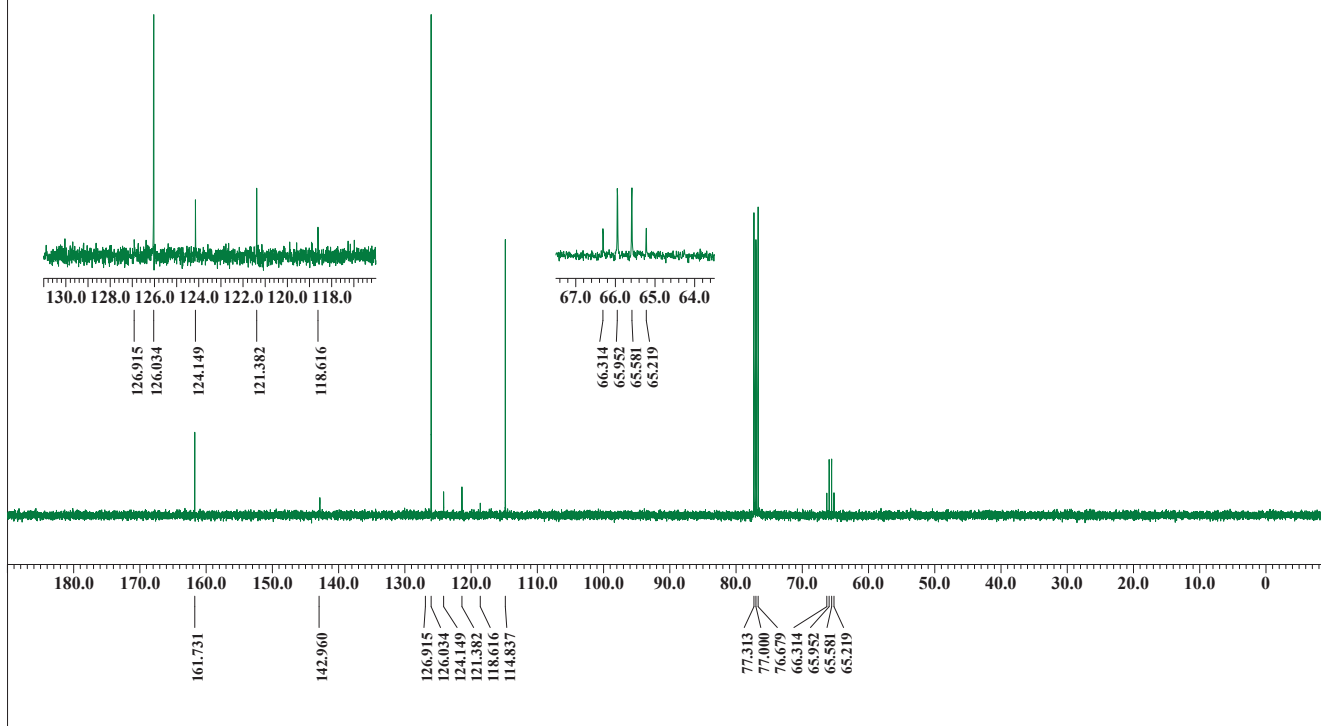

4-(2,2,2-Trifluoroethoxy)benzonitrile (3ad)

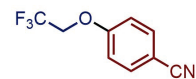

$^1\text{H}$  NMR (400 MHz,  $\text{CDCl}_3$ )

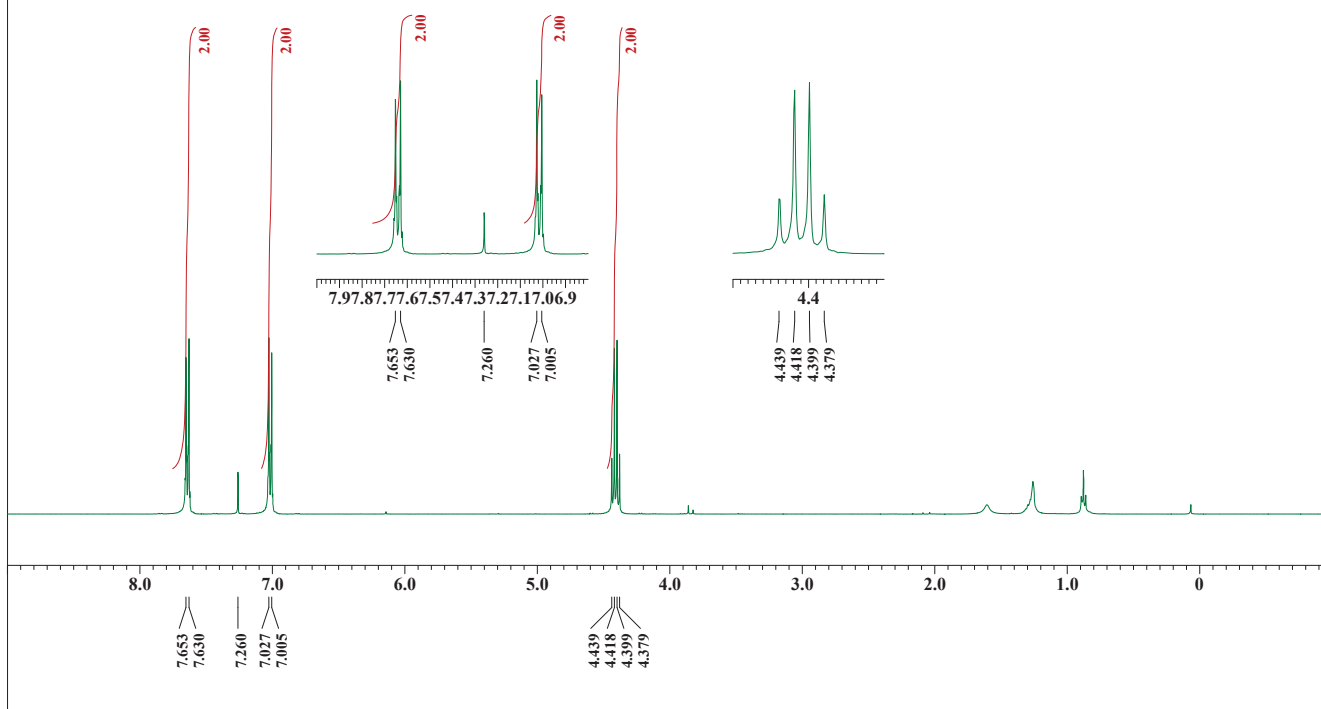

4-(2,2,2-Trifluoroethoxy)benzonitrile (3ad)

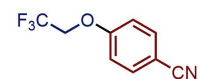

$^{19}\text{F}$  NMR (376 MHz,  $\text{CDCl}_3$ )

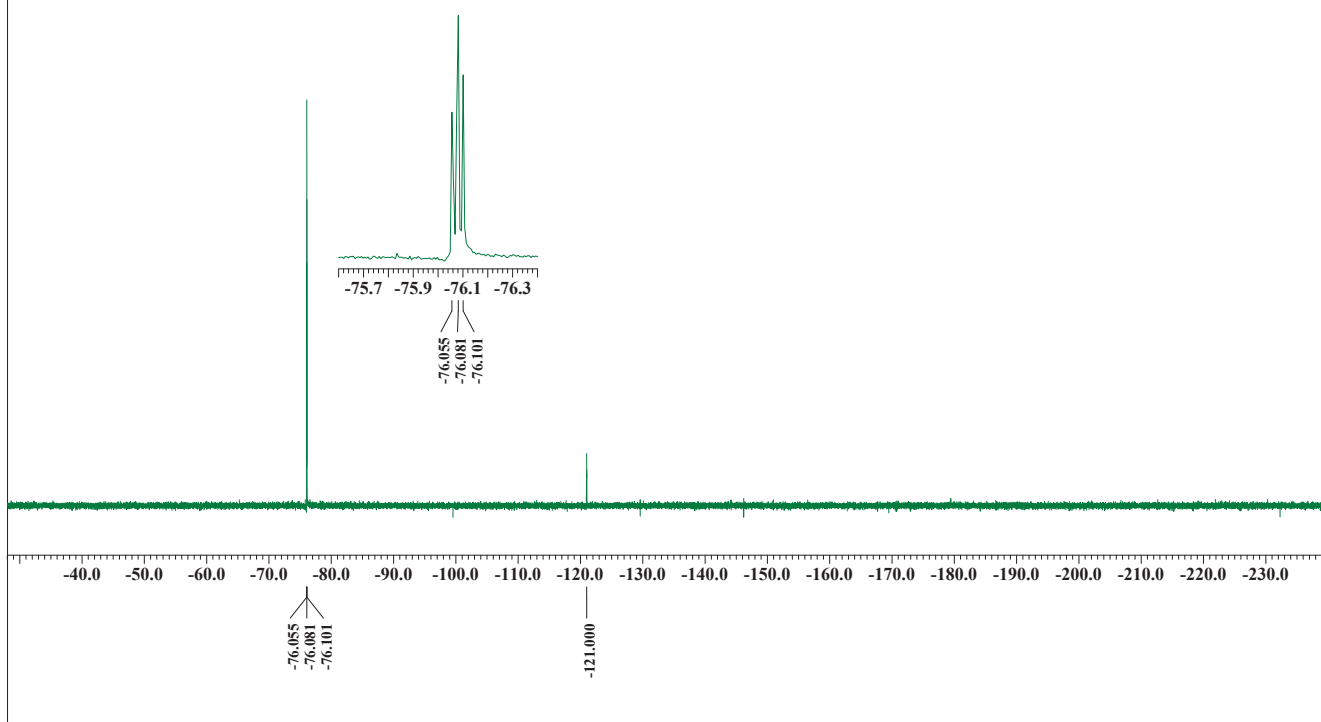

4-(2,2,2-Trifluoroethoxy)benzonitrile (3ad)

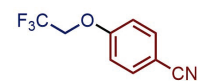

$^{13}\text{C}\{^1\text{H}\}$  NMR (100 MHz,  $\text{CDCl}_3$ )

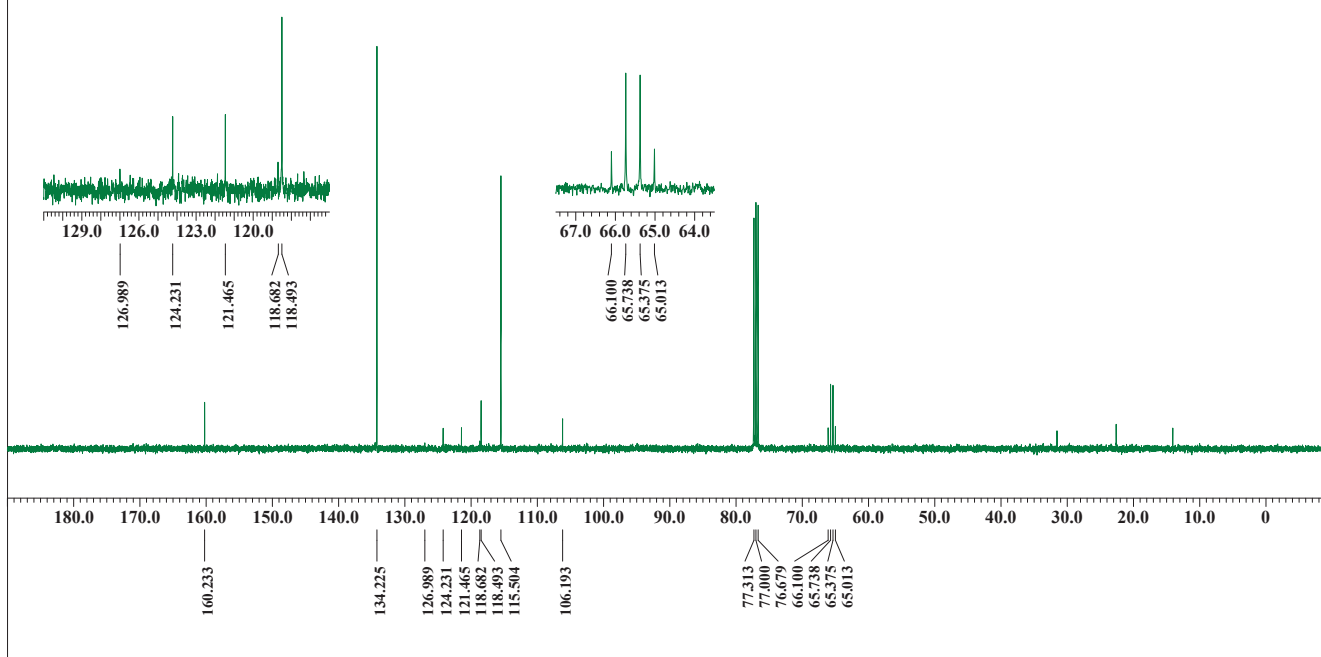

1-Acetyl-4-(2,2,2-trifluoroethoxy)benzene (3ae)

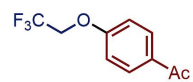

$^1\text{H}$  NMR (400 MHz,  $\text{CDCl}_3$ )

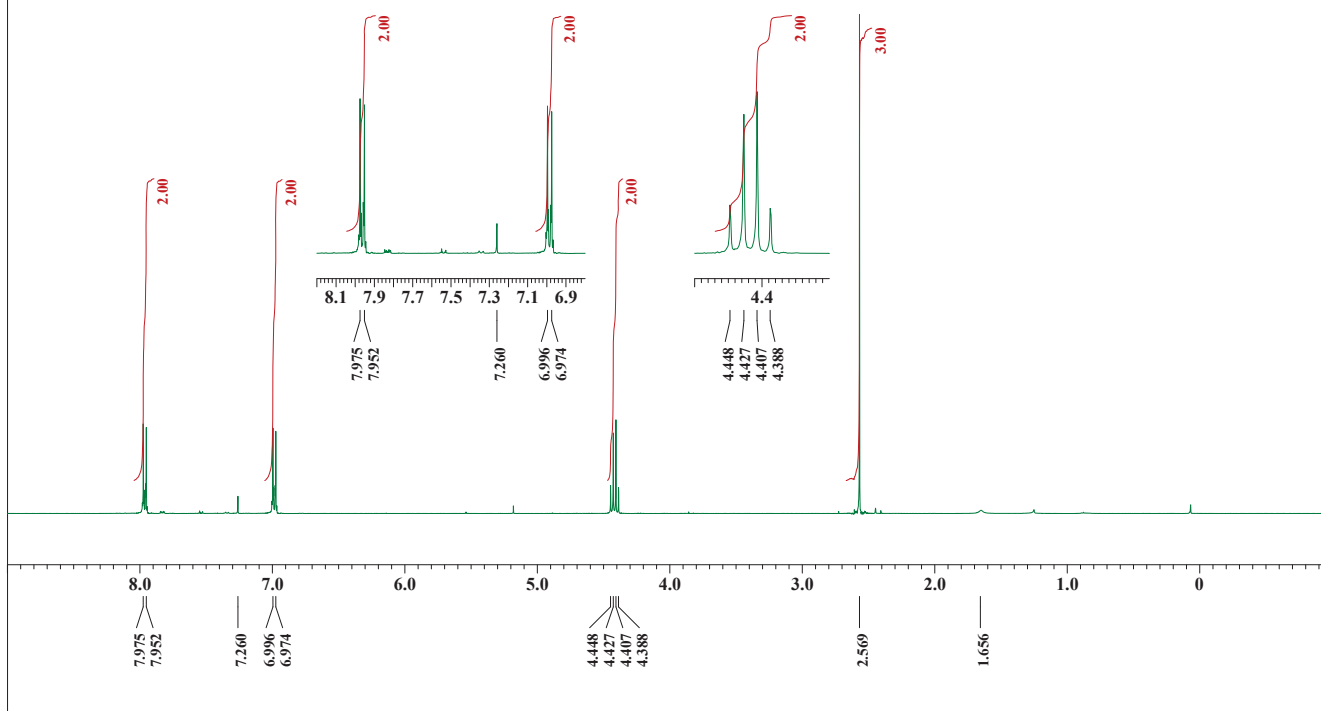

1-Acetyl-4-(2,2,2-trifluoroethoxy)benzene (3ae)

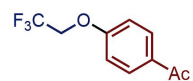

$^{19}\text{F}$  NMR (376 MHz,  $\text{CDCl}_3$ )

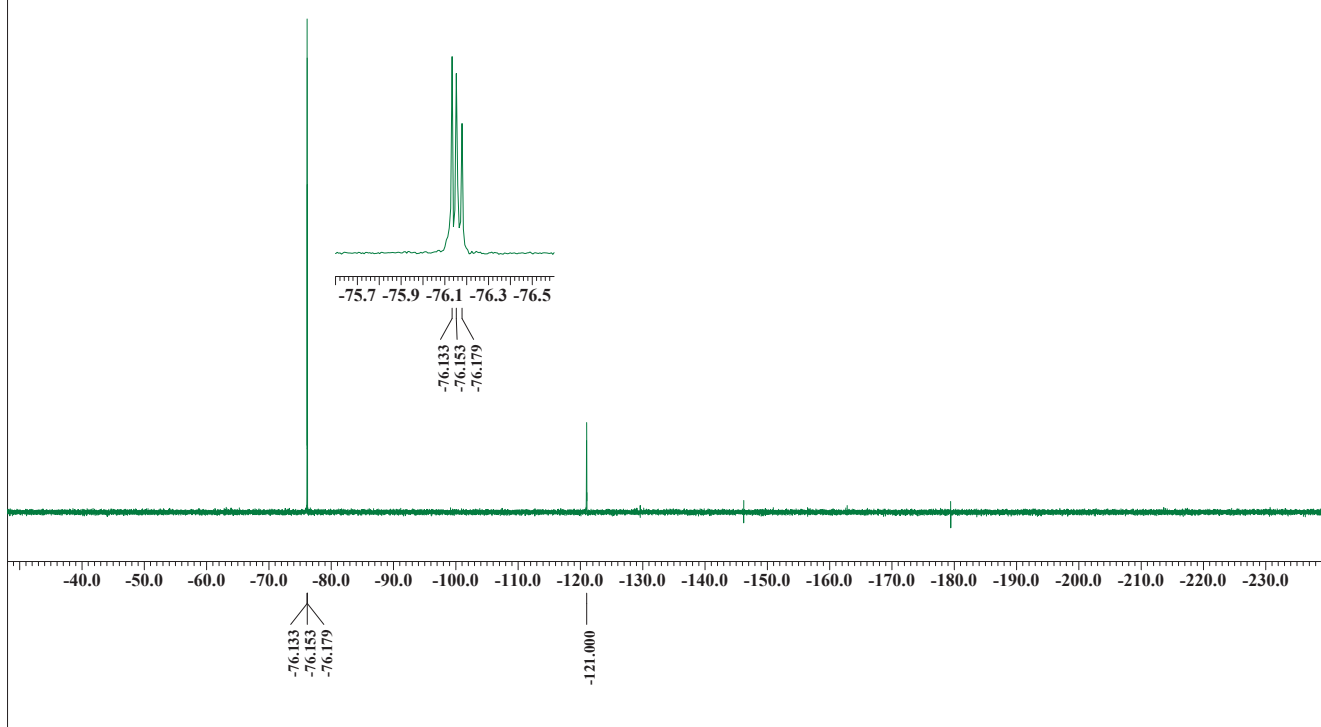

1-Acetyl-4-(2,2,2-trifluoroethoxy)benzene (3ae)

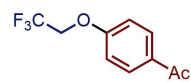

$^{13}\text{C}\{^1\text{H}\}$  NMR (100 MHz,  $\text{CDCl}_3$ )

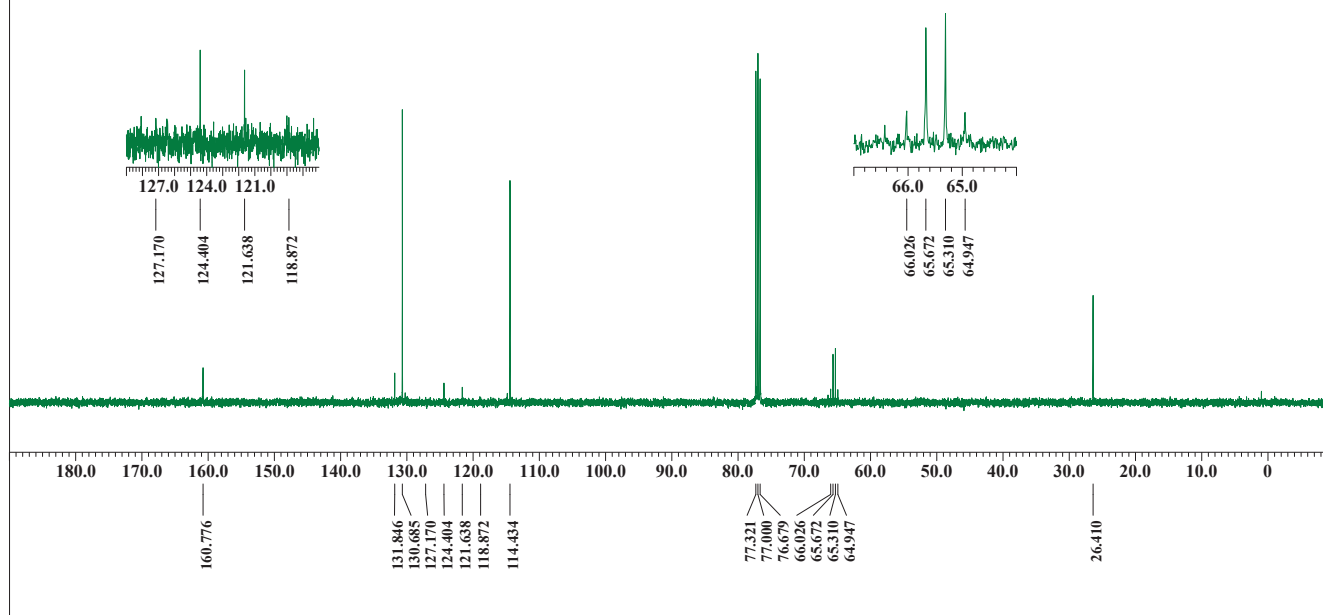

1-Bromo-4-(2,2,2-trifluoroethoxy)benzene (3af)

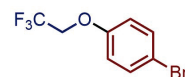

$^1\text{H}$  NMR (400 MHz,  $\text{CDCl}_3$ )

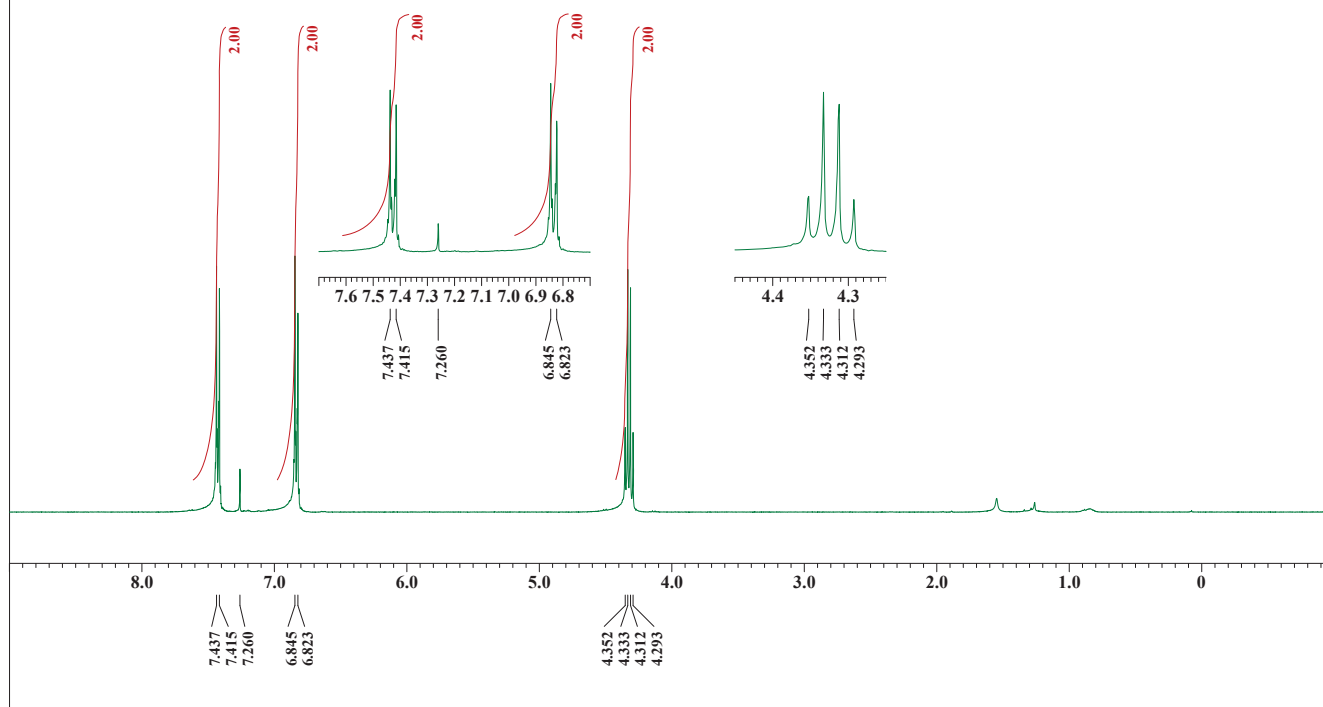

1-Bromo-4-(2,2,2-trifluoroethoxy)benzene (3af)

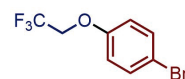

$^{19}\text{F}$  NMR (376 MHz,  $\text{CDCl}_3$ )

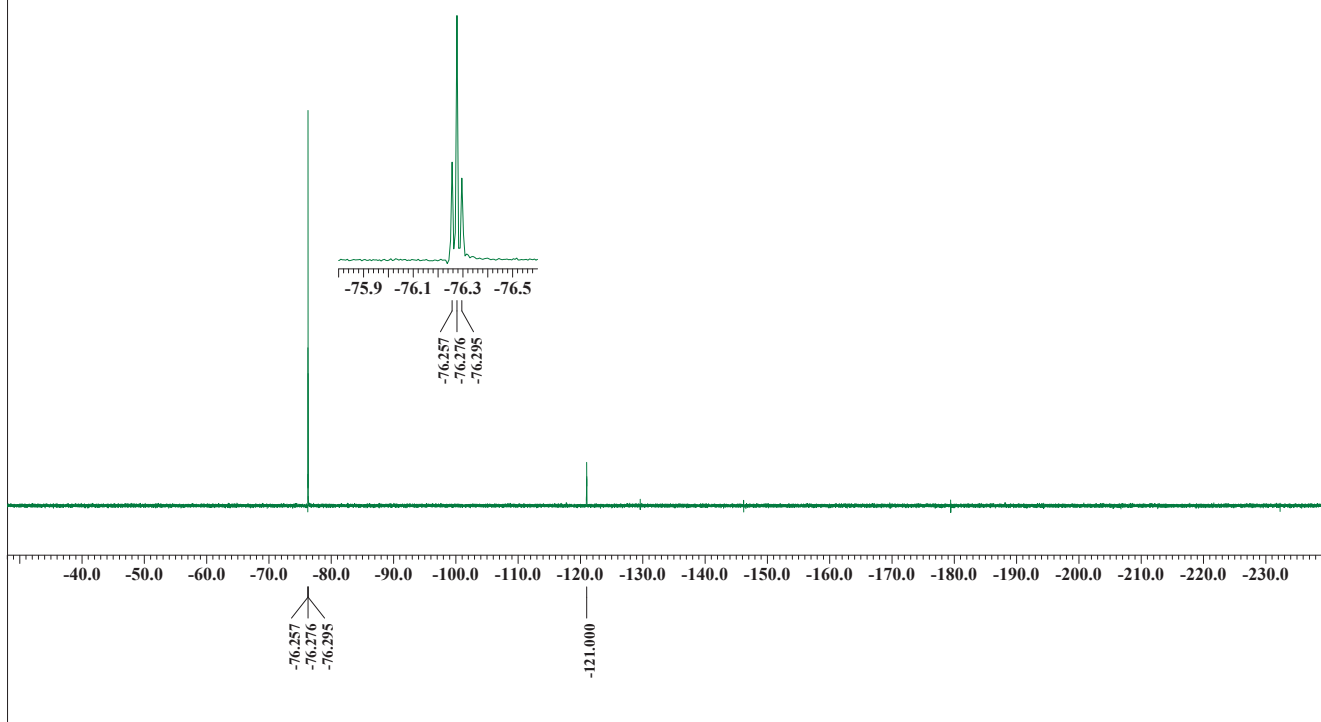

1-Bromo-4-(2,2,2-trifluoroethoxy)benzene (3af)

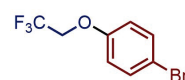

$^{13}\text{C}\{^1\text{H}\}$  NMR (100 MHz,  $\text{CDCl}_3$ )

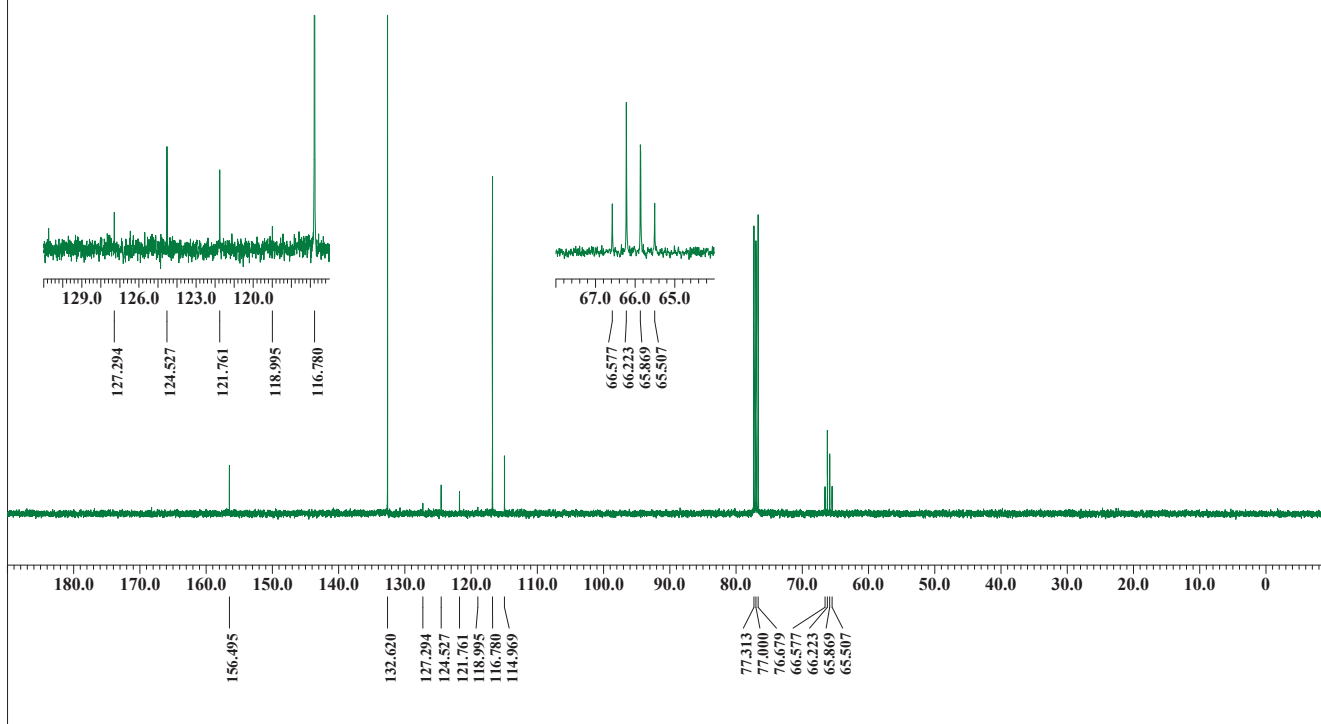

1-Methyl-4-(2,2,2-trifluoroethoxy)benzene (3ag)

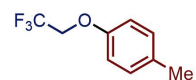

$^1\text{H}$  NMR (400 MHz,  $\text{CDCl}_3$ )

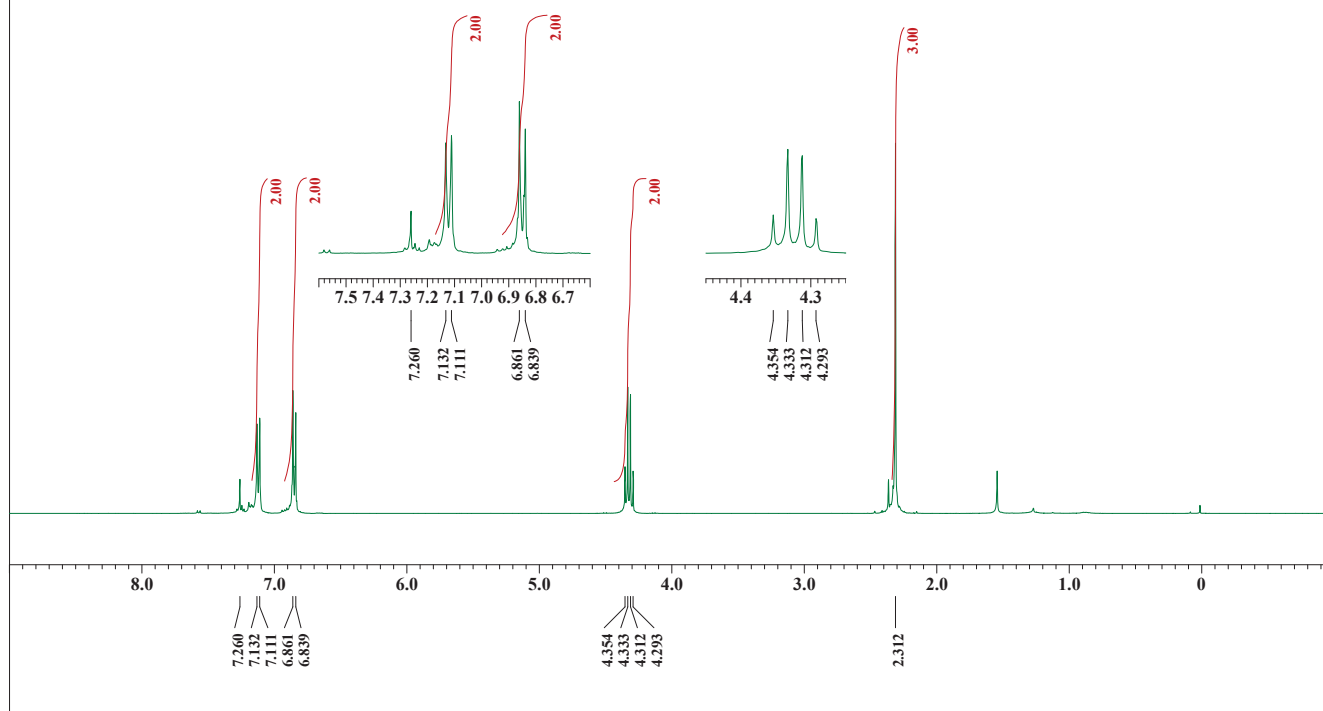

1-Methyl-4-(2,2,2-trifluoroethoxy)benzene (3ag)

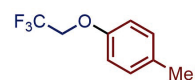

$^{19}\text{F}$  NMR (376 MHz,  $\text{CDCl}_3$ )

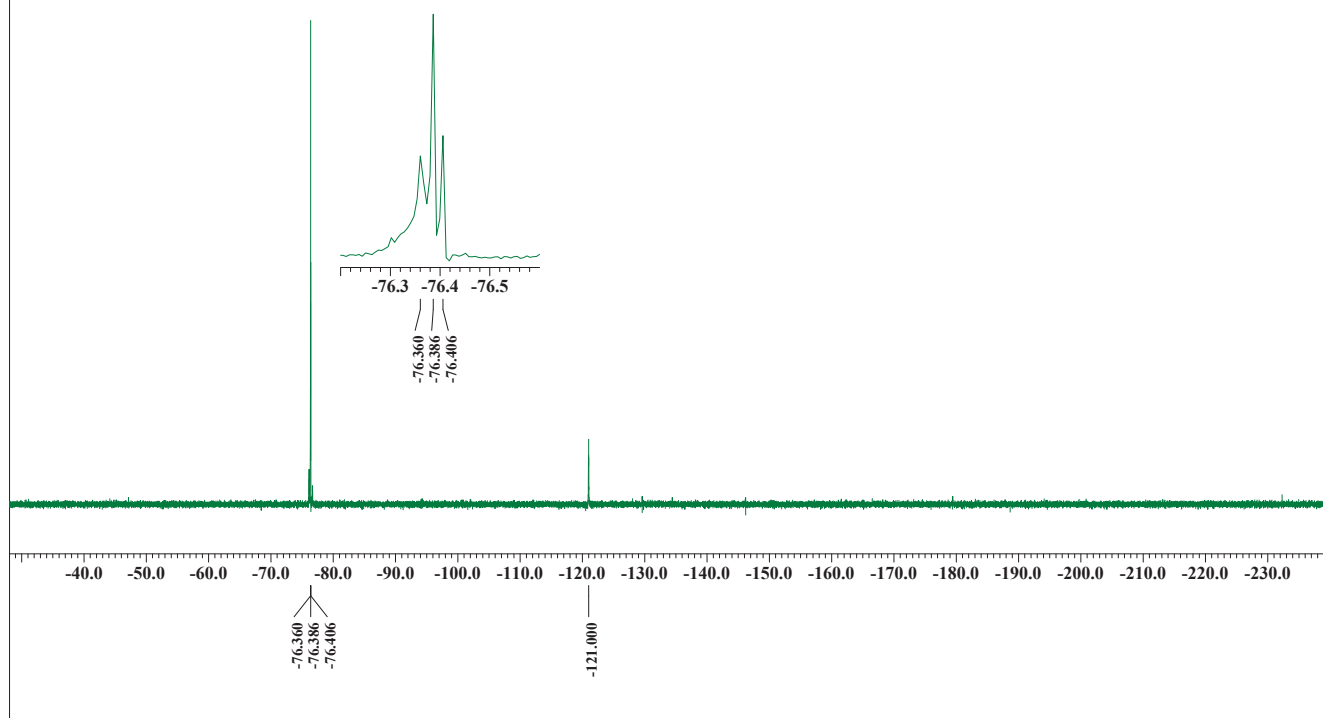

1-Methyl-4-(2,2,2-trifluoroethoxy)benzene (3ag)

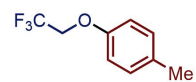

$^{13}\text{C}\{^1\text{H}\}$  NMR (100 MHz,  $\text{CDCl}_3$ )

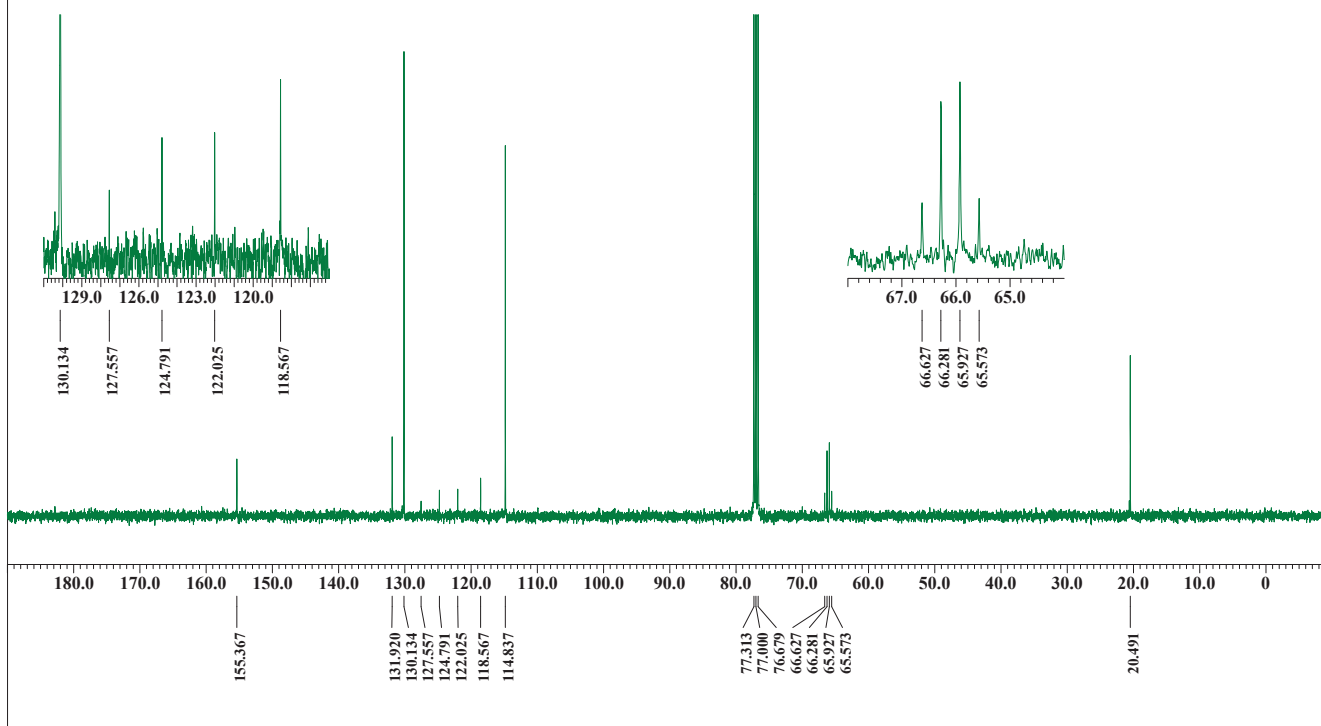

1-(*tert*-Butyl)-4-(2,2,2-trifluoroethoxy)benzene (3ah)

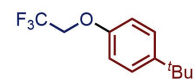

$^1\text{H}$  NMR (400 MHz,  $\text{CDCl}_3$ )

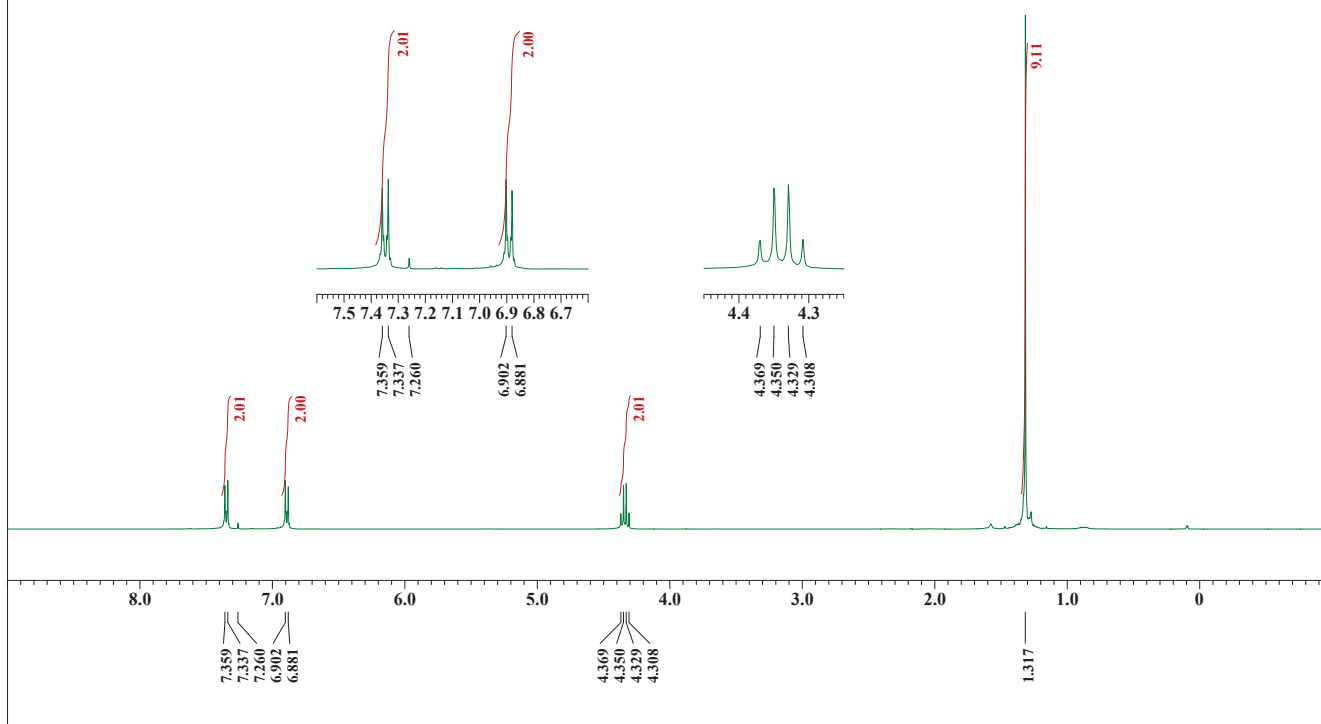

1-(*tert*-Butyl)-4-(2,2,2-trifluoroethoxy)benzene (3ah)

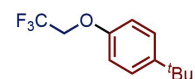

$^{19}\text{F}$  NMR (376 MHz,  $\text{CDCl}_3$ )

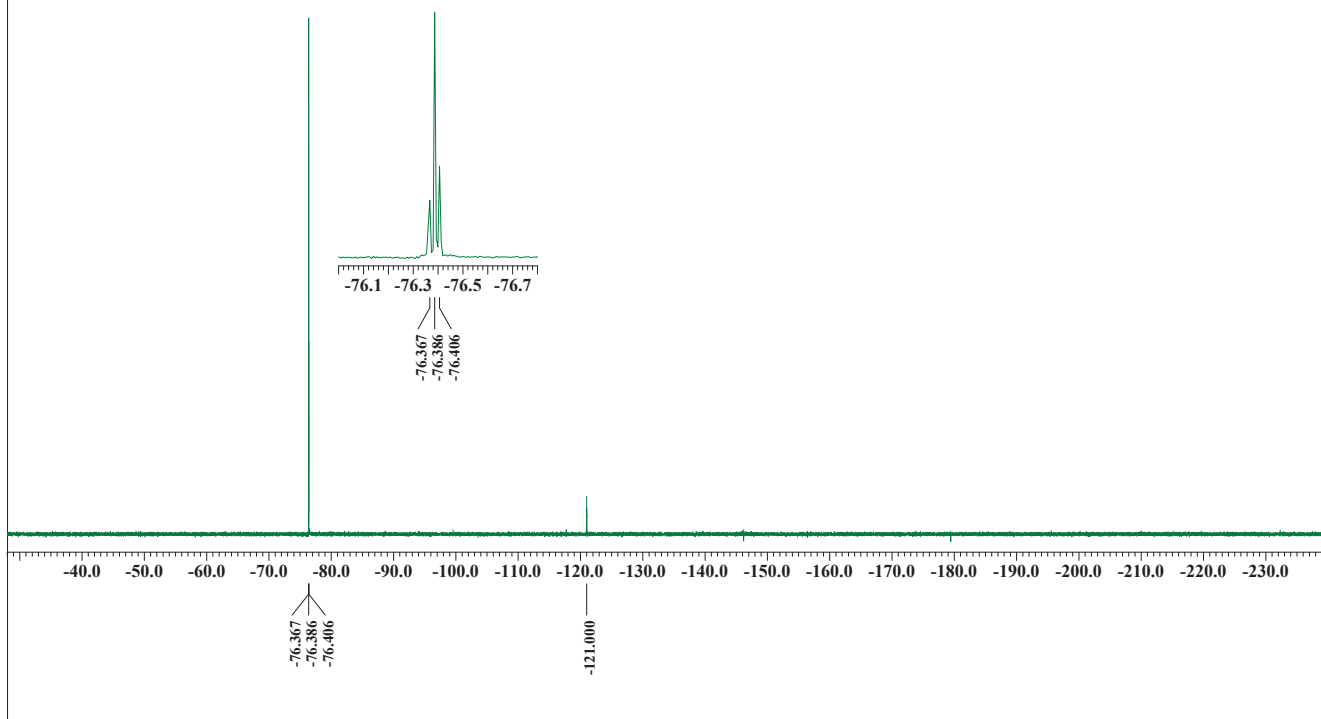

1-(*tert*-Butyl)-4-(2,2,2-trifluoroethoxy)benzene (3ah)

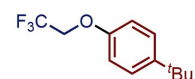

$^{13}\text{C}\{^1\text{H}\}$  NMR (100 MHz,  $\text{CDCl}_3$ )

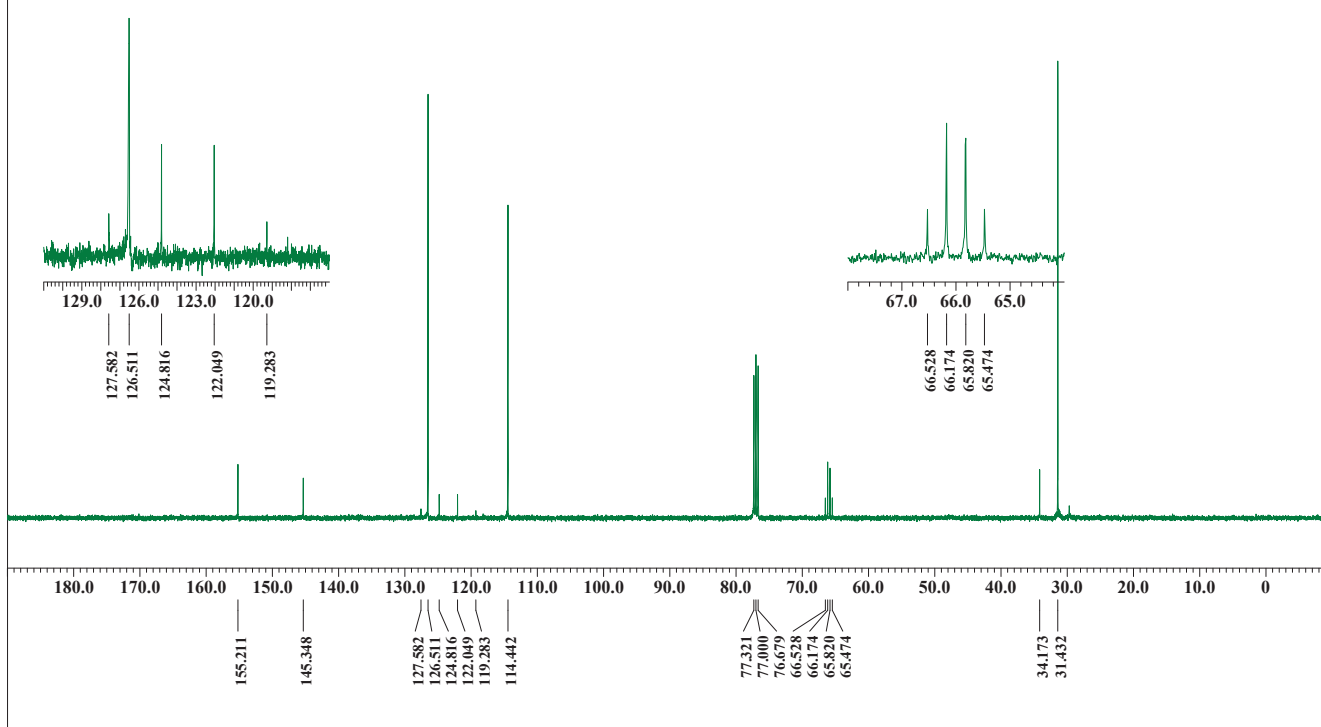



1-Methyl-2-(2,2,2-trifluoroethoxy)benzene (3ai)

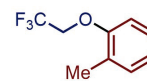

$^1\text{H}$  NMR (400 MHz,  $\text{CDCl}_3$ )

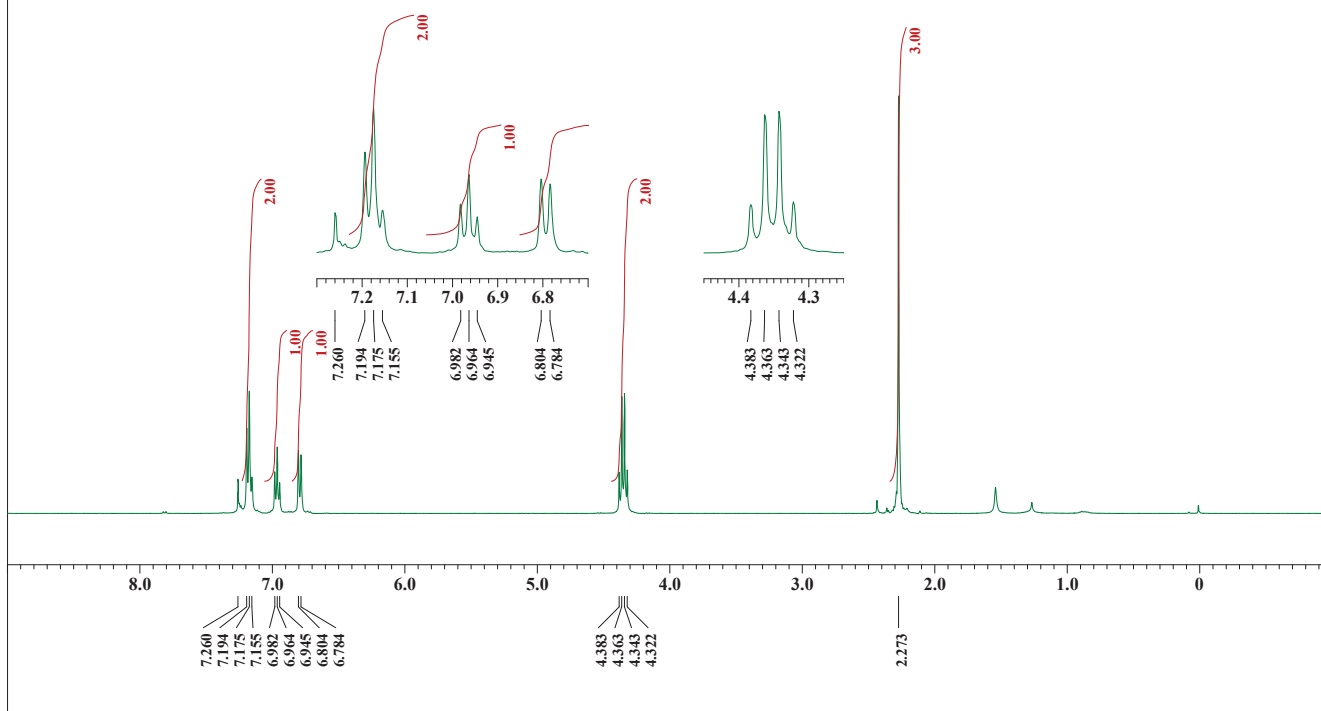

1-Methyl-2-(2,2,2-trifluoroethoxy)benzene (3ai)

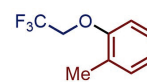

$^{19}\text{F}$  NMR (376 MHz,  $\text{CDCl}_3$ )

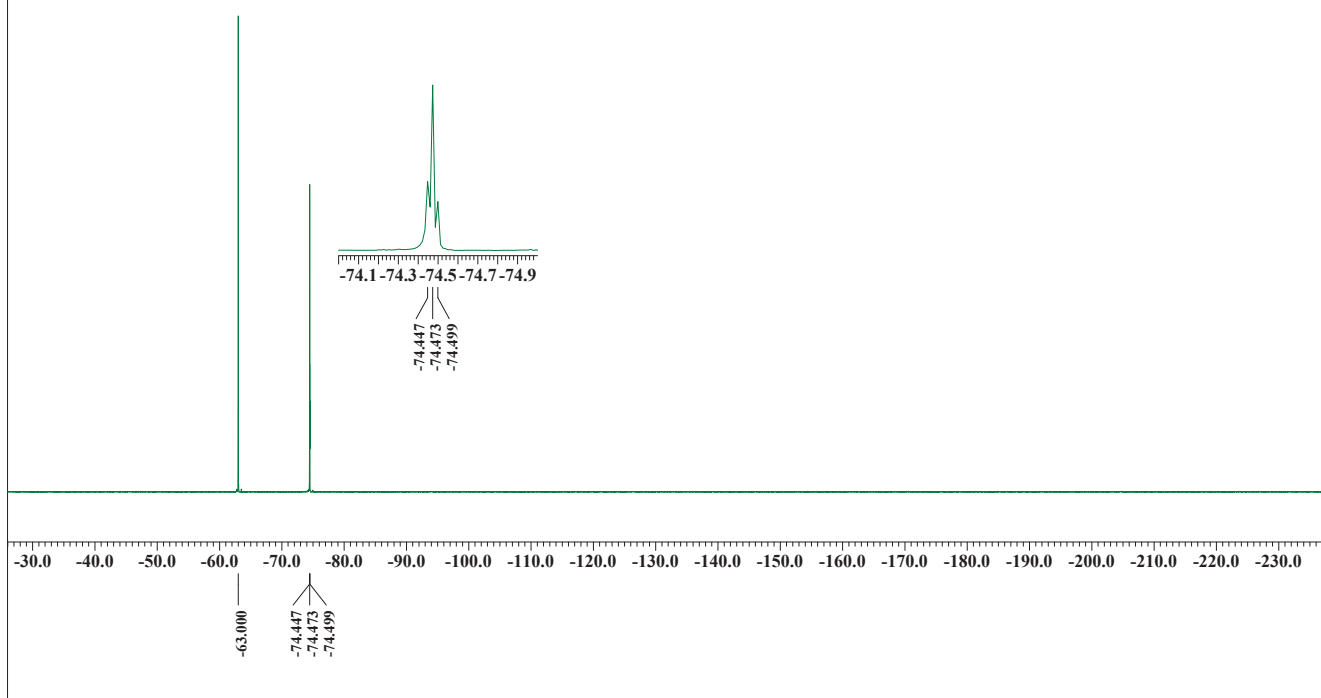

1-Methyl-2-(2,2,2-trifluoroethoxy)benzene (3ai)

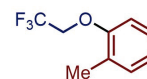

$^{13}\text{C}\{^1\text{H}\}$  NMR (100 MHz,  $\text{CDCl}_3$ )

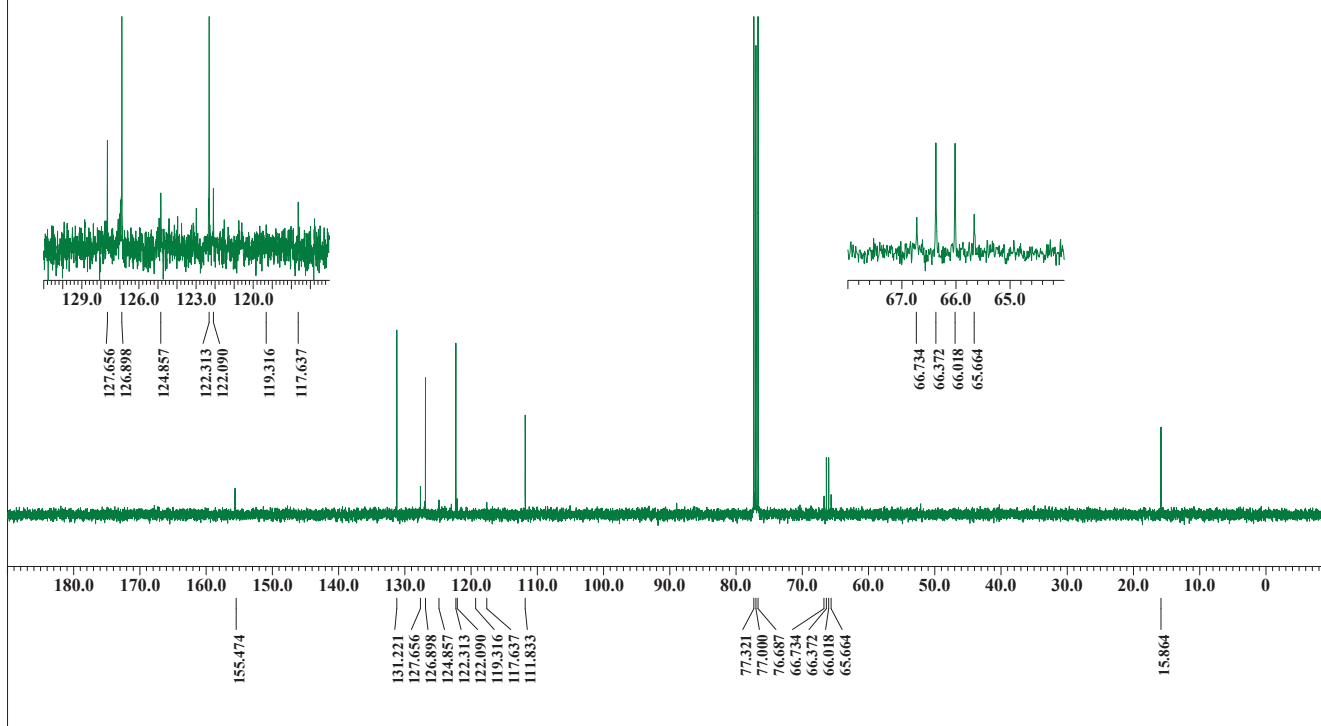

1,3-Dimethyl-5-(2,2,2-trifluoroethoxy)benzene (3aj)

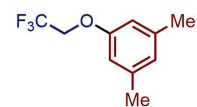

$^1\text{H}$  NMR (400 MHz,  $\text{CDCl}_3$ )

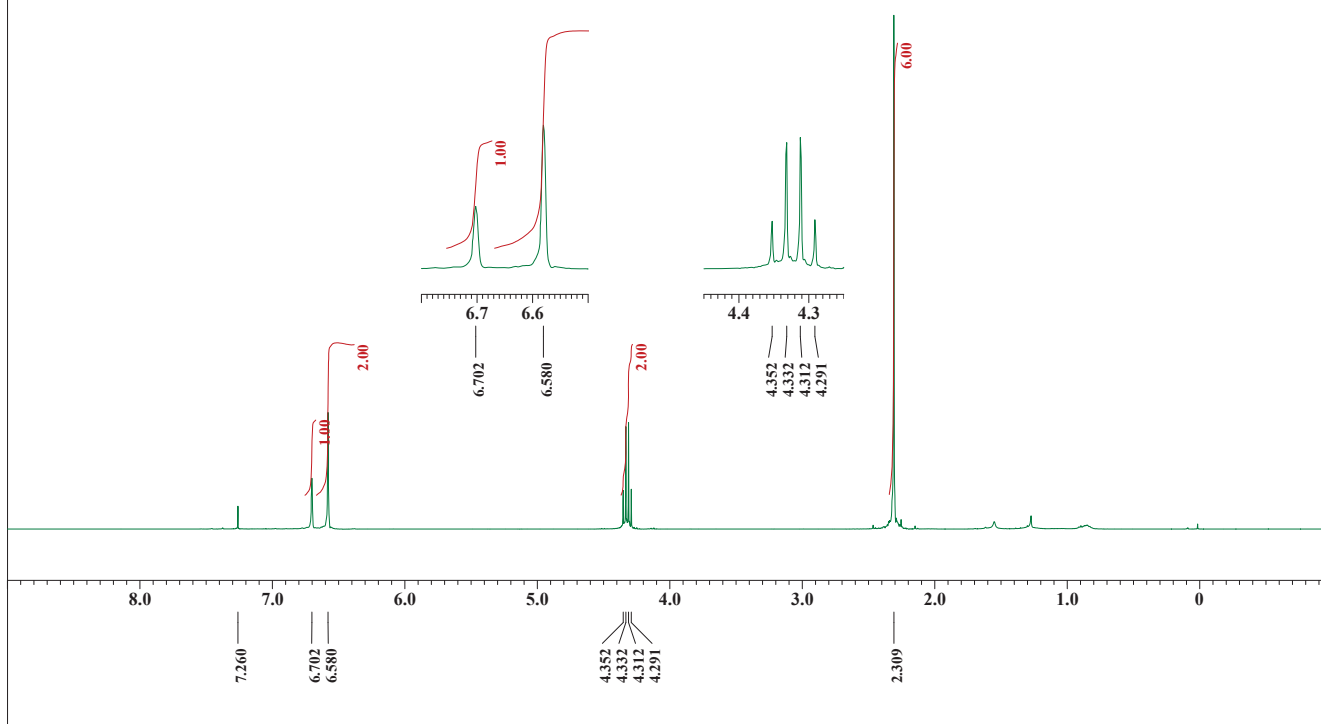

1,3-Dimethyl-5-(2,2,2-trifluoroethoxy)benzene (3aj)

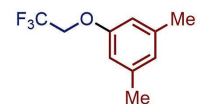

$^{19}\text{F}$  NMR (376 MHz,  $\text{CDCl}_3$ )

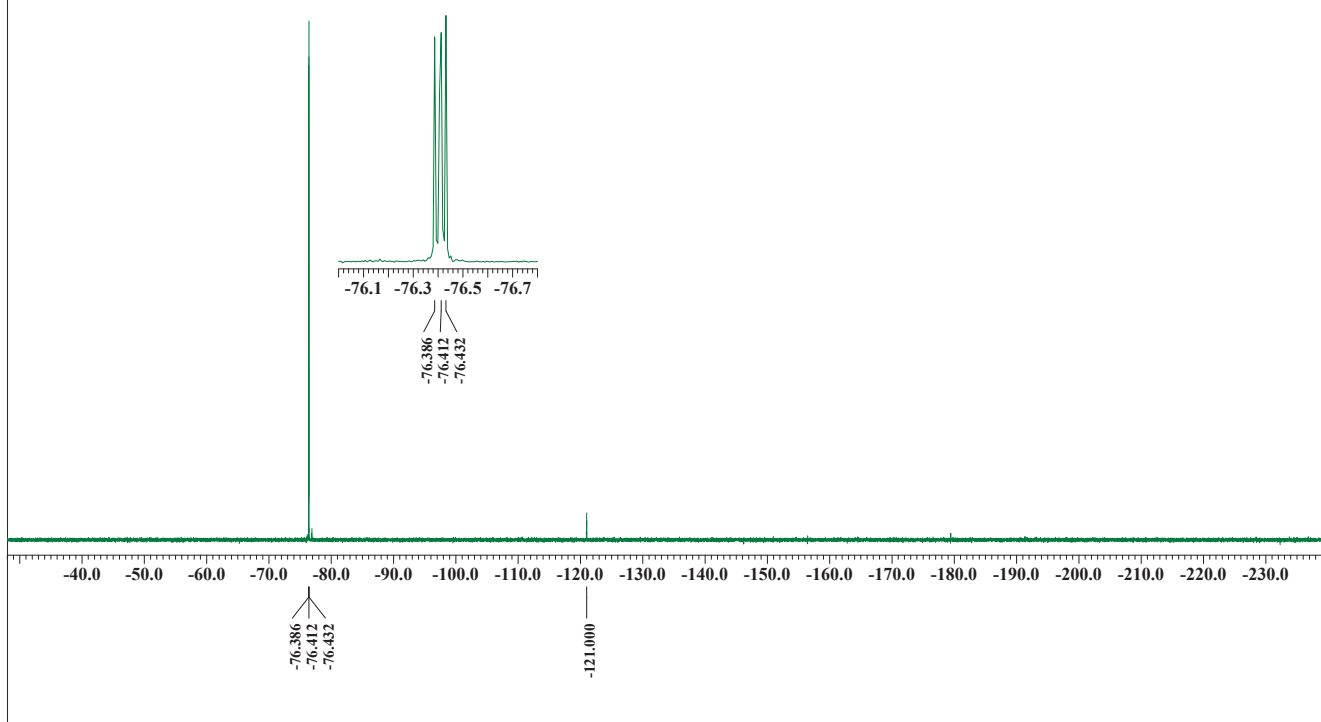

1,3-Dimethyl-5-(2,2,2-trifluoroethoxy)benzene (3aj)



$^{13}\text{C}\{^1\text{H}\}$  NMR (100 MHz,  $\text{CDCl}_3$ )

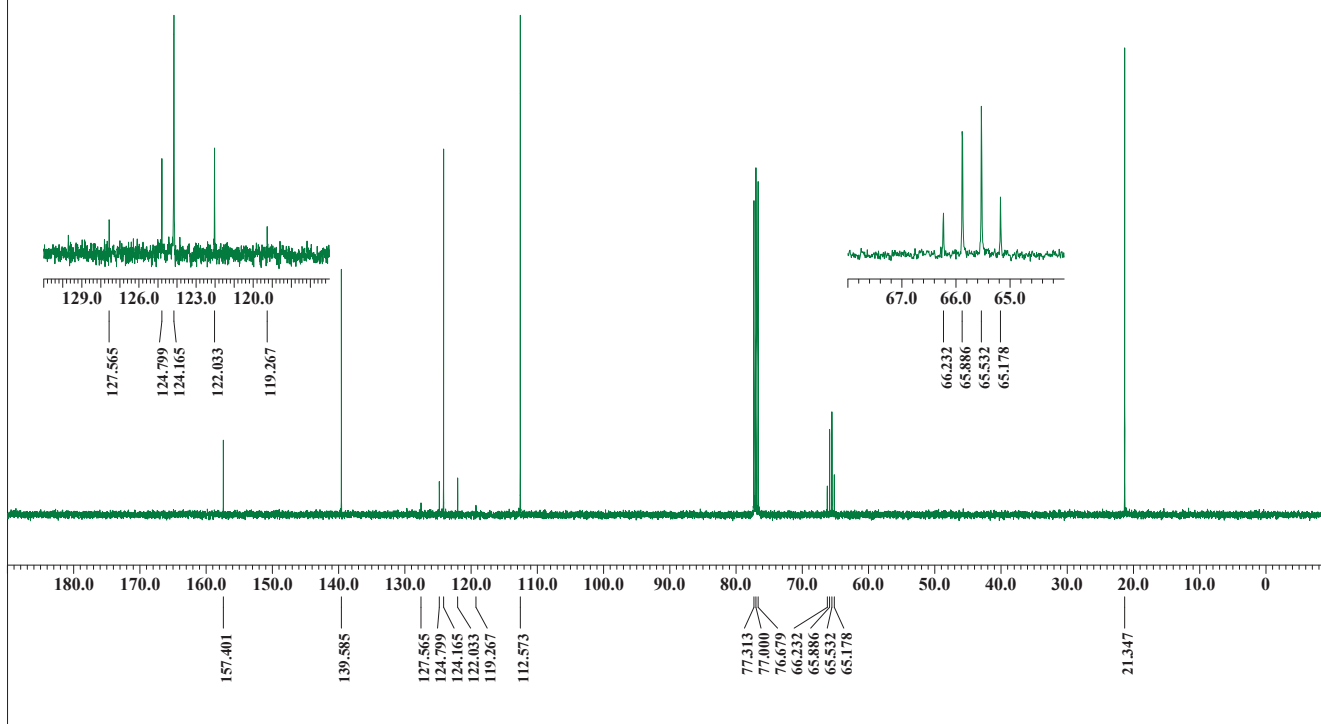

1-Isobutoxy-3-(2,2,2-trifluoroethoxy)benzene (3ak)

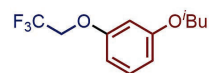

$^1\text{H}$  NMR (400 MHz,  $\text{CDCl}_3$ )

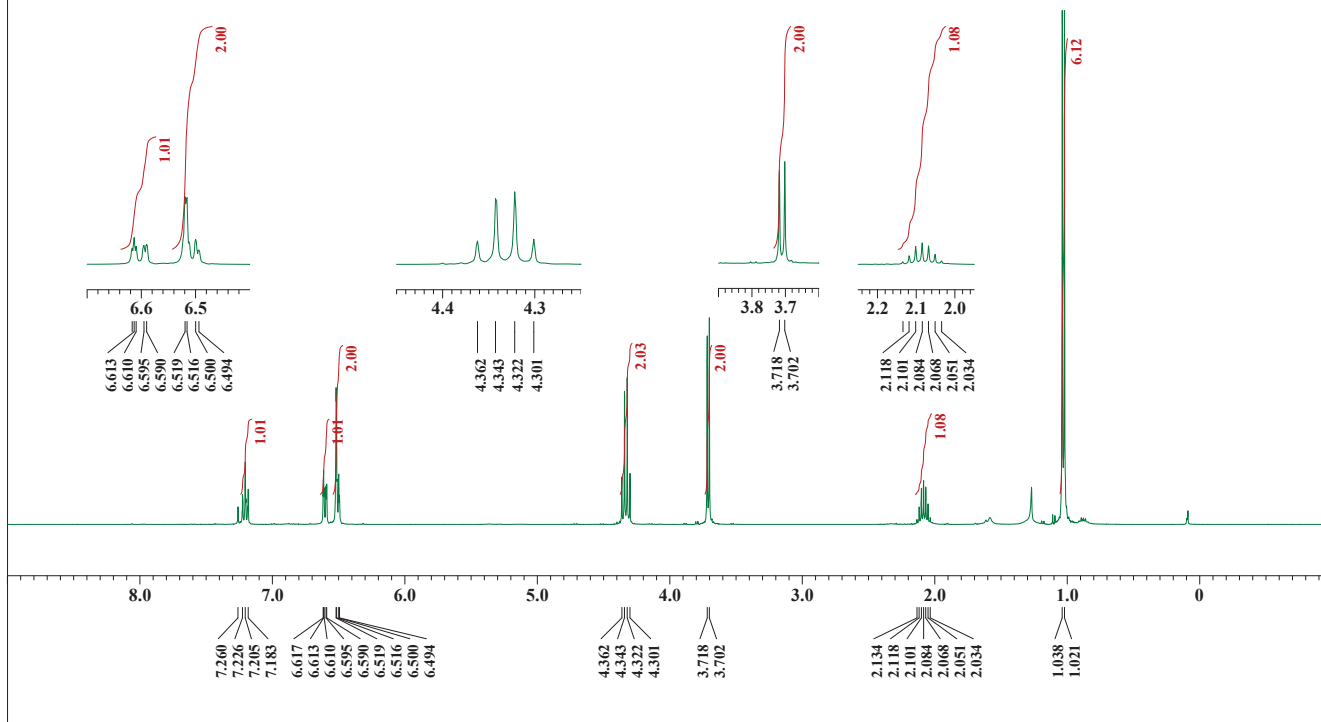

1-Isobutoxy-3-(2,2,2-trifluoroethoxy)benzene (3ak)

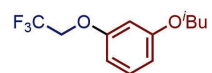

$^{19}\text{F}$  NMR (376 MHz,  $\text{CDCl}_3$ )

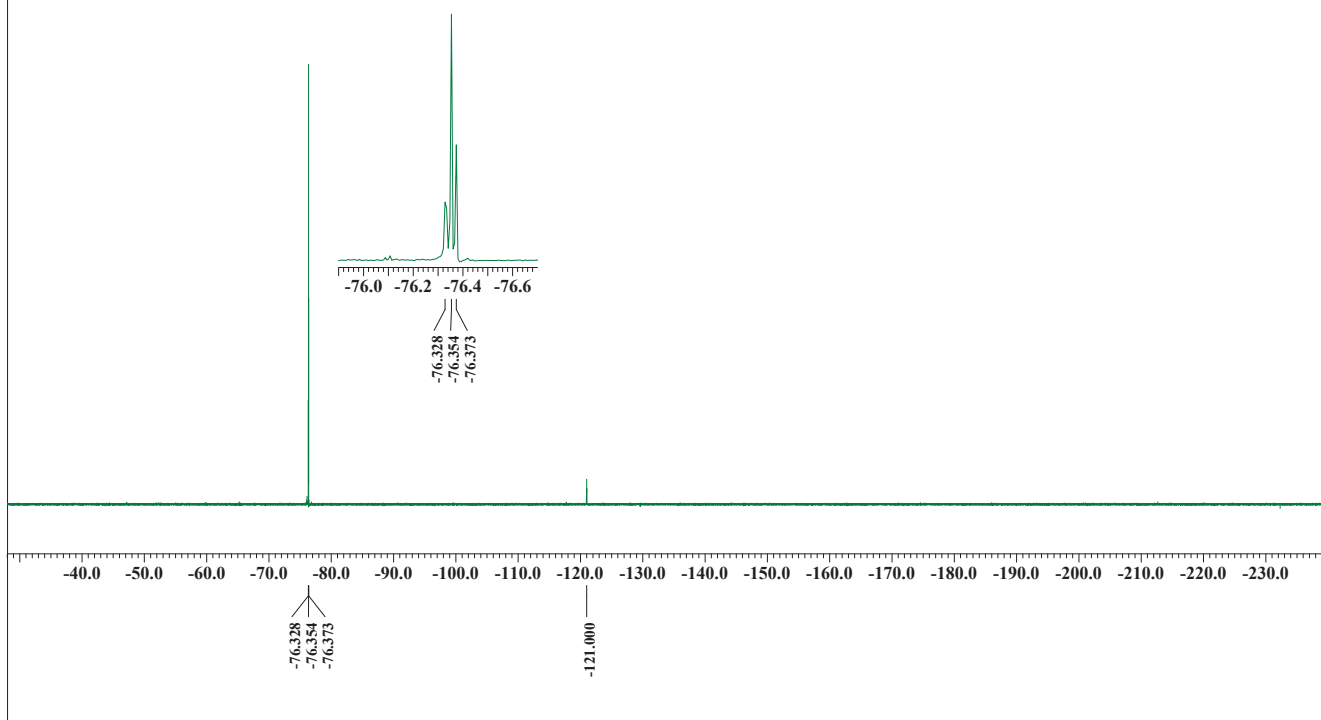

1-Isobutoxy-3-(2,2,2-trifluoroethoxy)benzene (3ak)

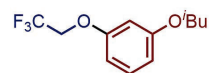

$^{13}\text{C}\{^1\text{H}\}$  NMR (100 MHz,  $\text{CDCl}_3$ )

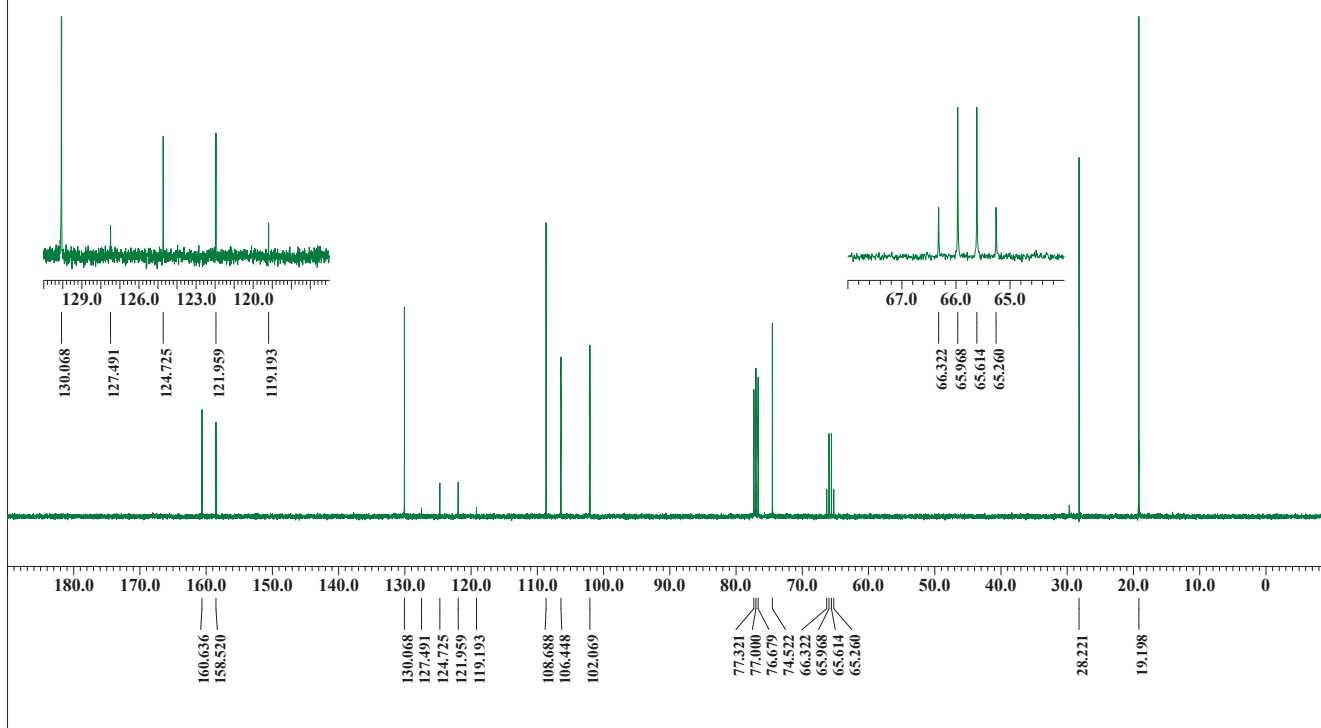

2-Chloro-5-(2,2,2-trifluoroethoxy)pyridine (3al)

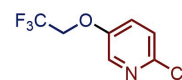

$^1\text{H}$  NMR (400 MHz,  $\text{CDCl}_3$ )

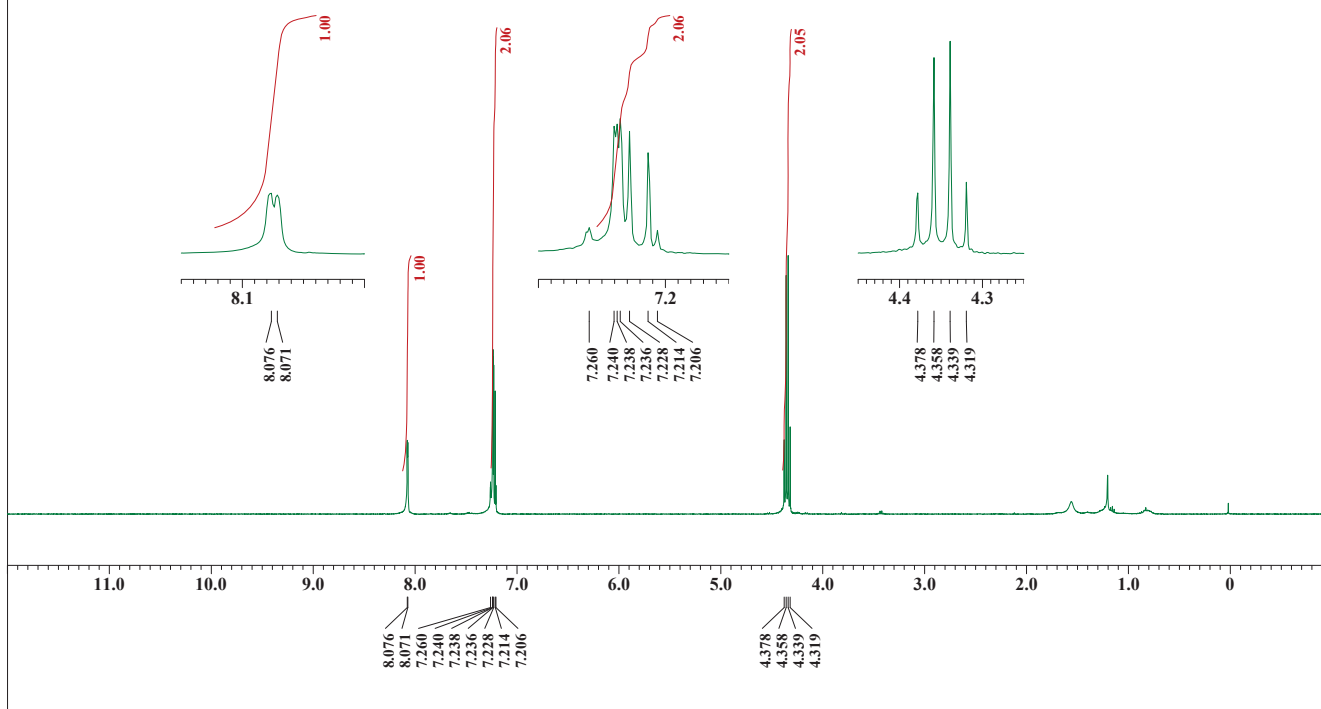

2-Chloro-5-(2,2,2-trifluoroethoxy)pyridine (3al)

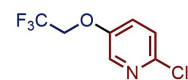

$^{19}\text{F}$  NMR (376 MHz,  $\text{CDCl}_3$ )

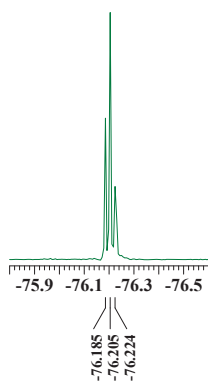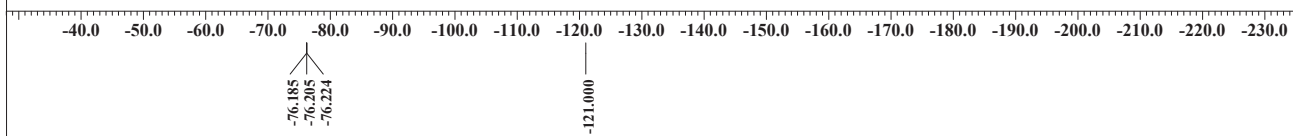

2-Chloro-5-(2,2,2-trifluoroethoxy)pyridine (3al)

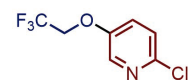

$^{13}\text{C}\{^1\text{H}\}$  NMR (100 MHz,  $\text{CDCl}_3$ )

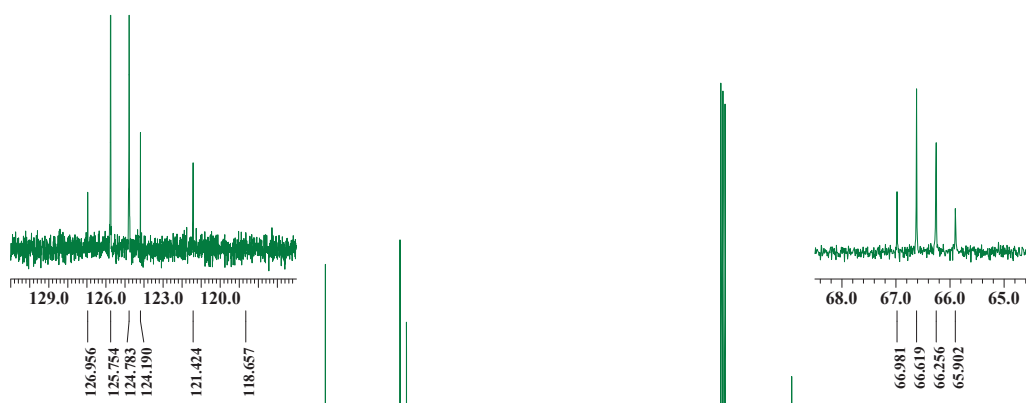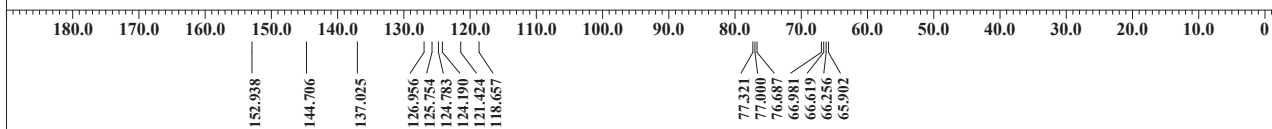

4-((1,1,1,3,3,3-Hexafluoropropan-2-yl)oxy)-1,1'-biphenyl (3ba)

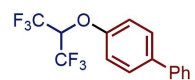

$^1\text{H}$  NMR (400 MHz,  $\text{CDCl}_3$ )

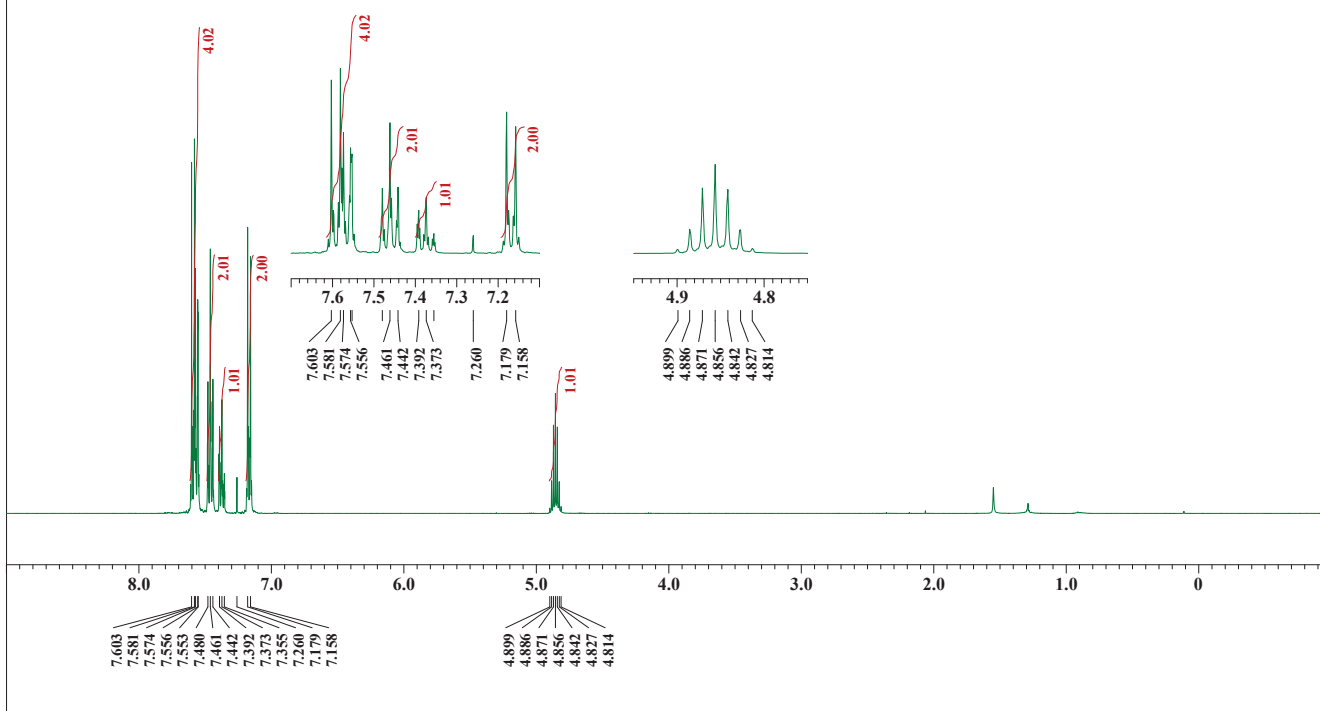

4-((1,1,1,3,3,3-Hexafluoropropan-2-yl)oxy)-1,1'-biphenyl (3ba)

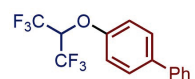

$^{19}\text{F}$  NMR (376 MHz,  $\text{CDCl}_3$ )

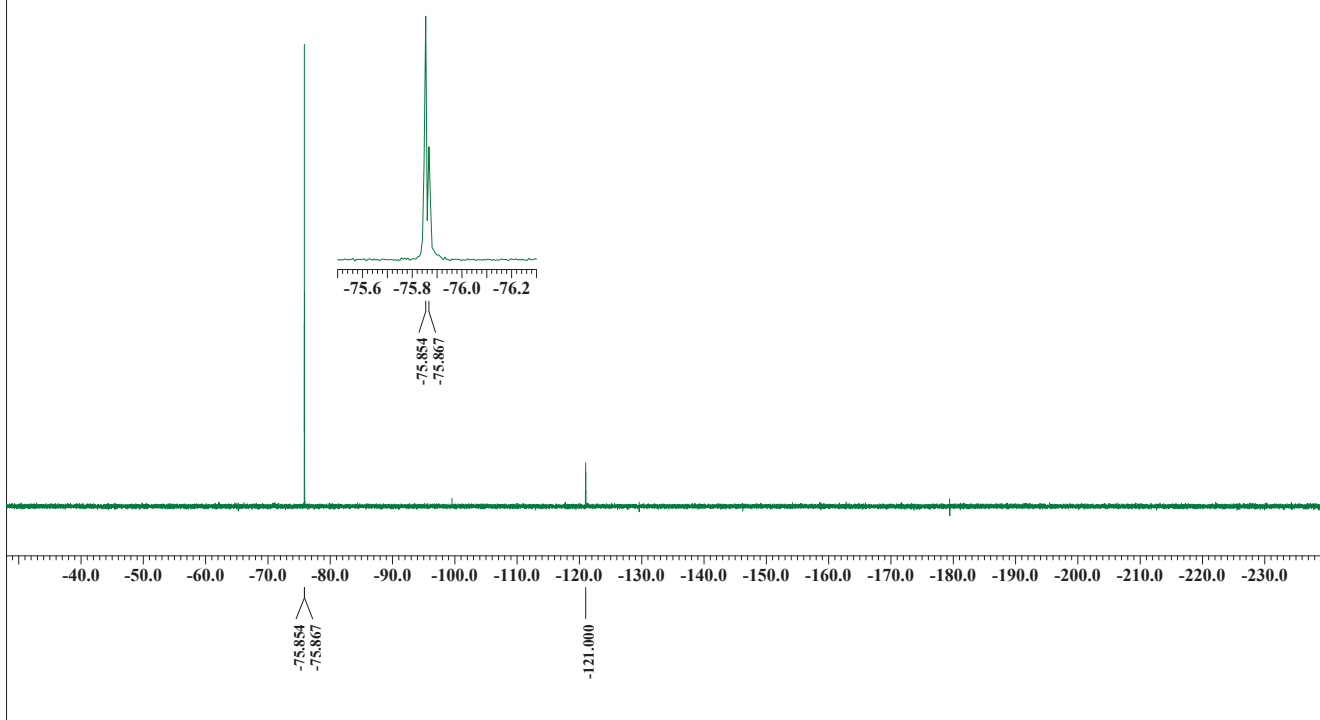

4-((1,1,1,3,3,3-Hexafluoropropan-2-yl)oxy)-1,1'-biphenyl (3ba)

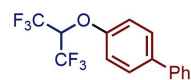

$^{13}\text{C}\{^1\text{H}\}$  NMR (100 MHz,  $\text{CDCl}_3$ )

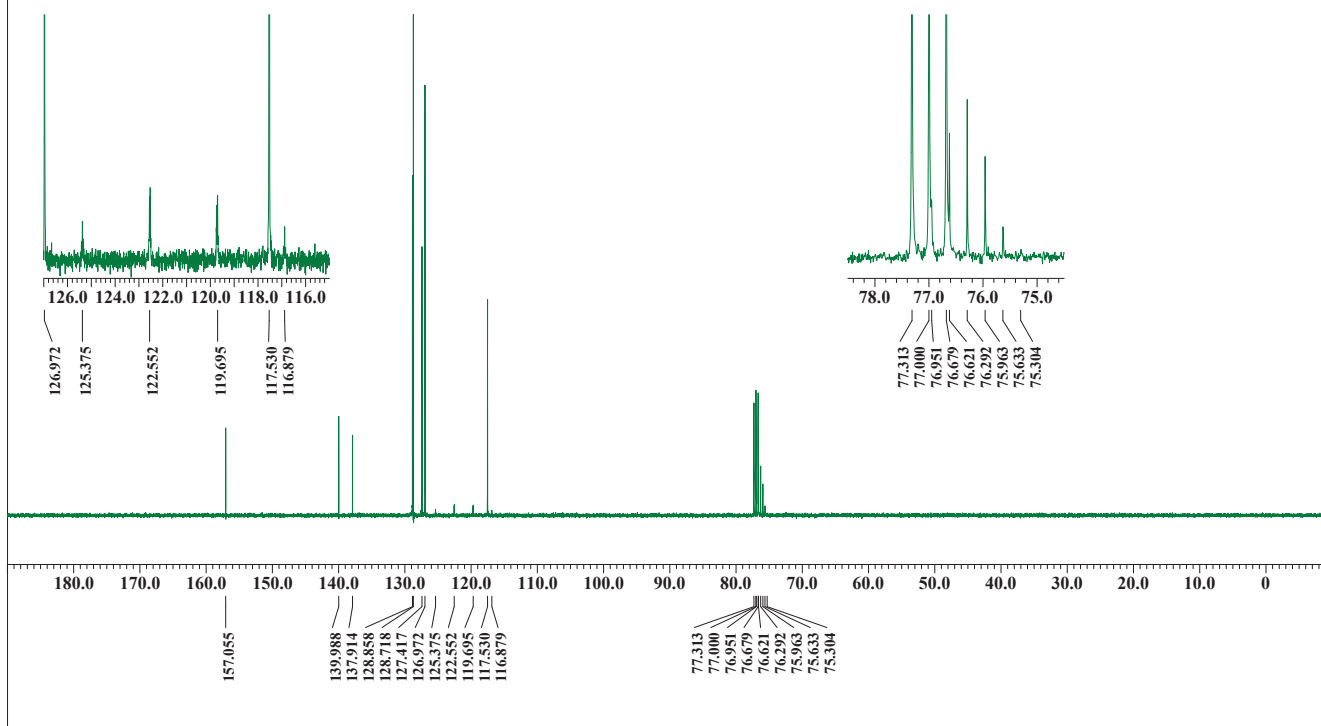

Methyl 4-((1,1,1,3,3,3-hexafluoropropan-2-yl)oxy)benzoate (3bb)

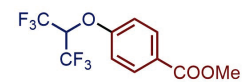

$^1\text{H}$  NMR (400 MHz,  $\text{CDCl}_3$ )

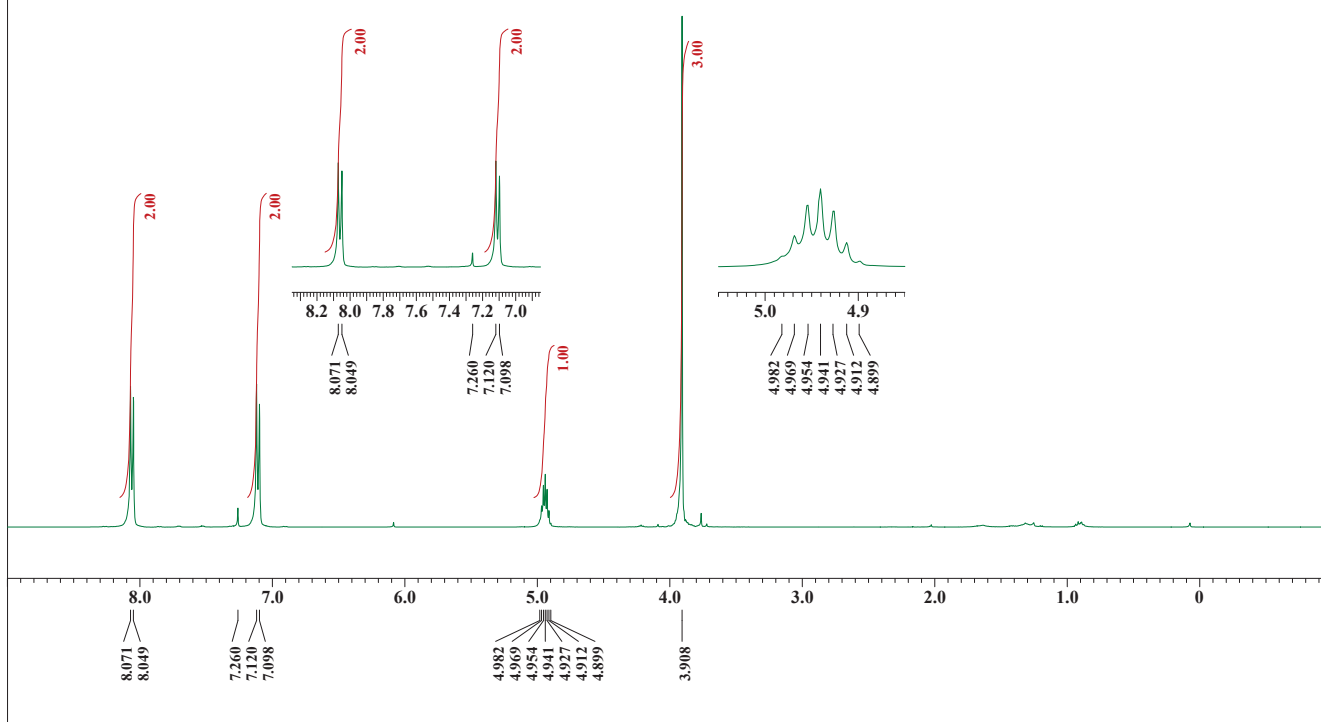



Methyl 4-((1,1,1,3,3,3-hexafluoropropan-2-yl)oxy)benzoate (3bb)

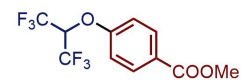

$^{19}\text{F}$  NMR (376 MHz,  $\text{CDCl}_3$ )

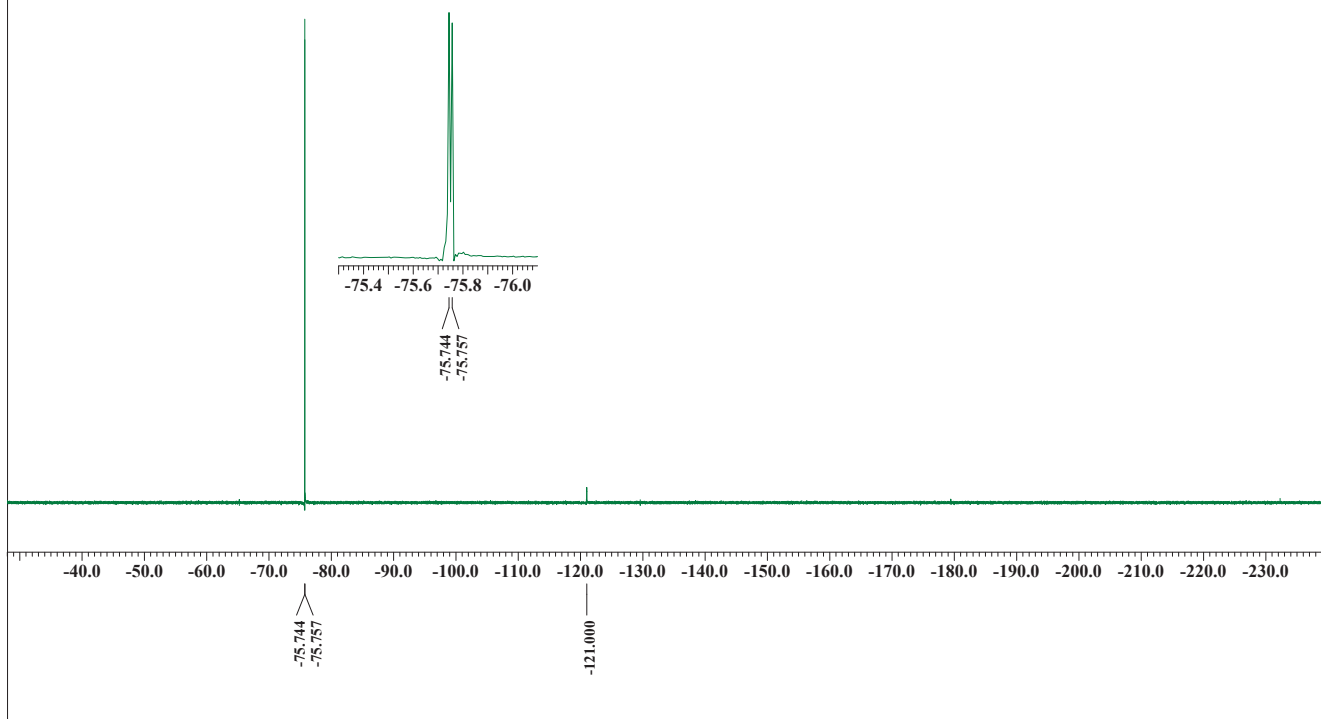

Methyl 4-((1,1,1,3,3,3-hexafluoropropan-2-yl)oxy)benzoate (3bb)

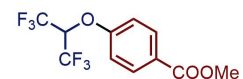

$^{13}\text{C}\{^1\text{H}\}$  NMR (100 MHz,  $\text{CDCl}_3$ )

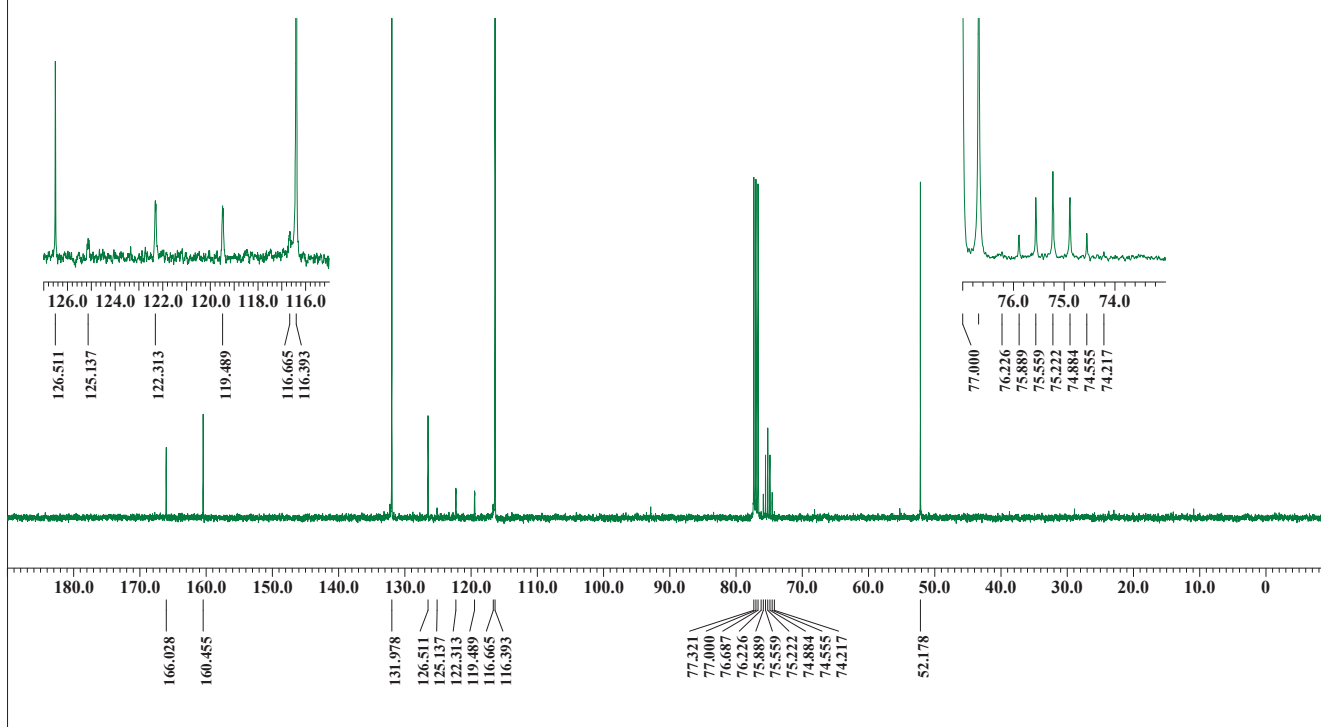

1-((1,1,1,3,3,3-Hexafluoropropan-2-yl)oxy)-4-nitrobenzene (3bc)

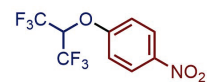

$^1\text{H}$  NMR (400 MHz,  $\text{CDCl}_3$ )

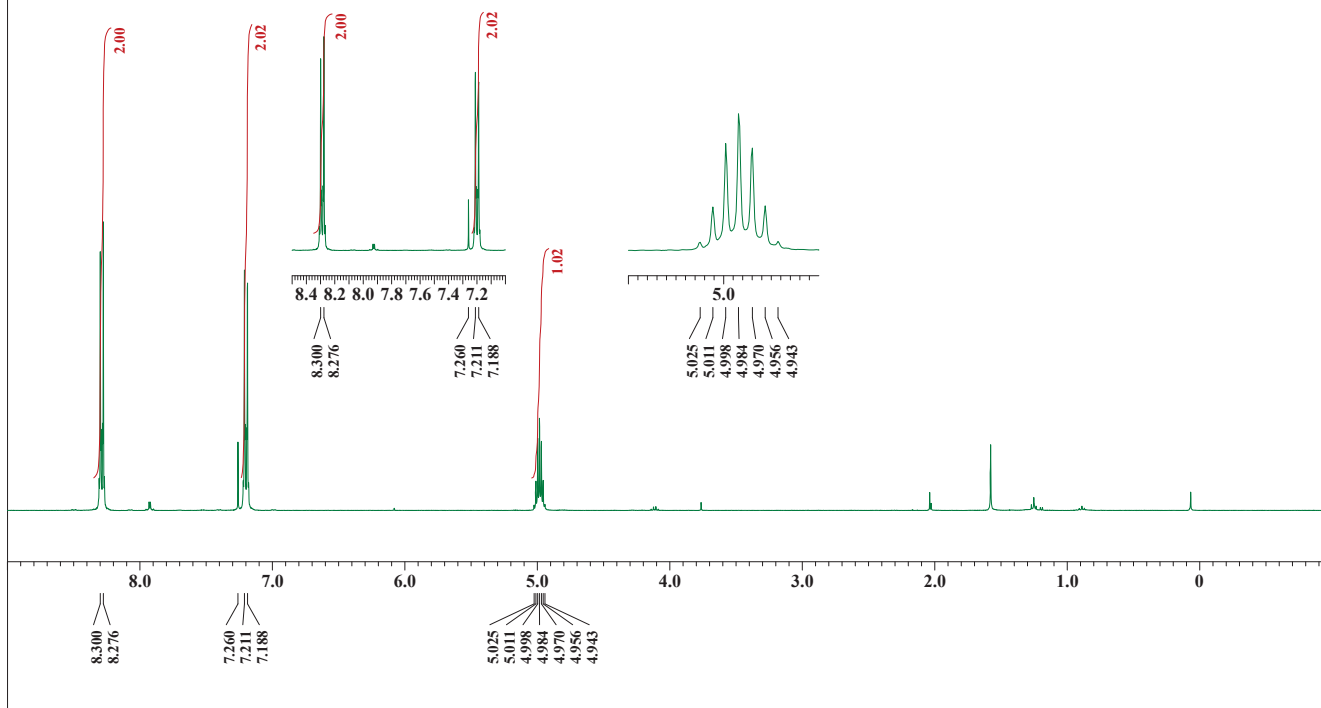

1-((1,1,1,3,3,3-Hexafluoropropan-2-yl)oxy)-4-nitrobenzene (3bc)

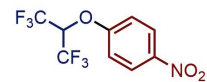

$^{19}\text{F}$  NMR (376 MHz,  $\text{CDCl}_3$ )

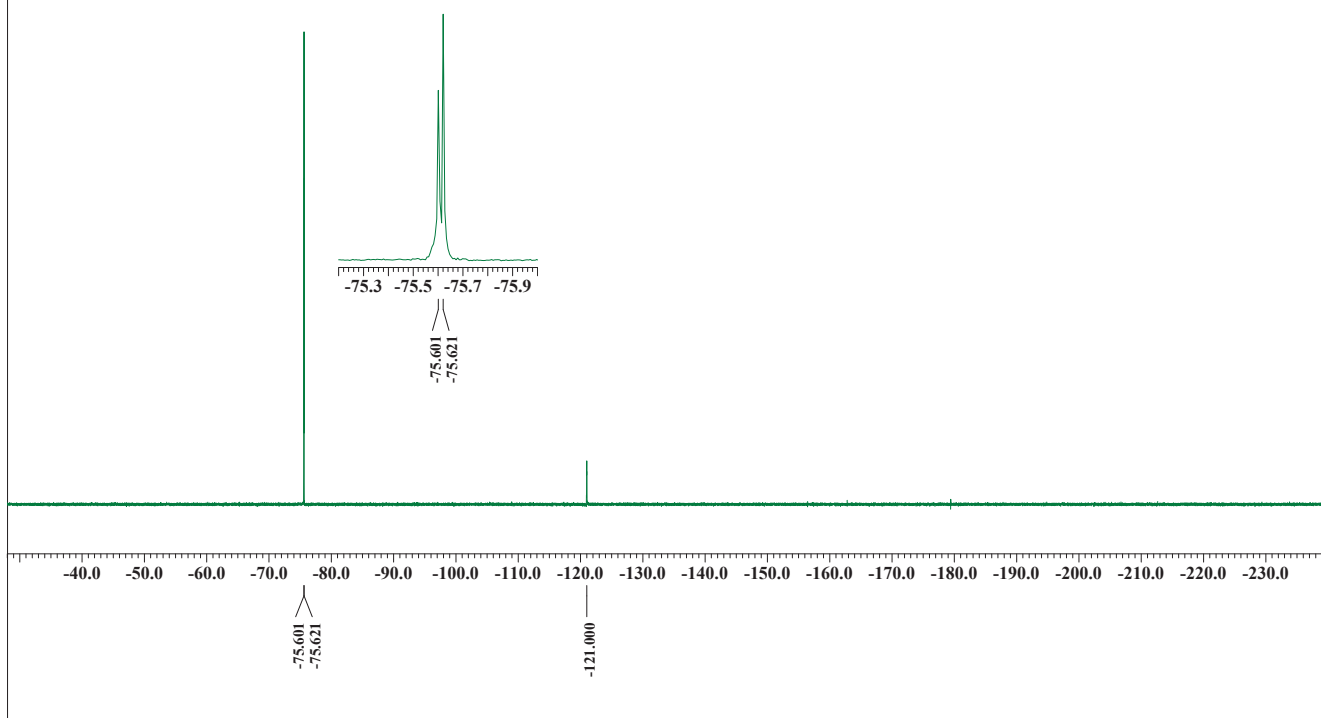

1-((1,1,1,3,3,3-Hexafluoropropan-2-yl)oxy)-4-nitrobenzene (3bc)



$^{13}\text{C}\{^1\text{H}\}$  NMR (100 MHz,  $\text{CDCl}_3$ )

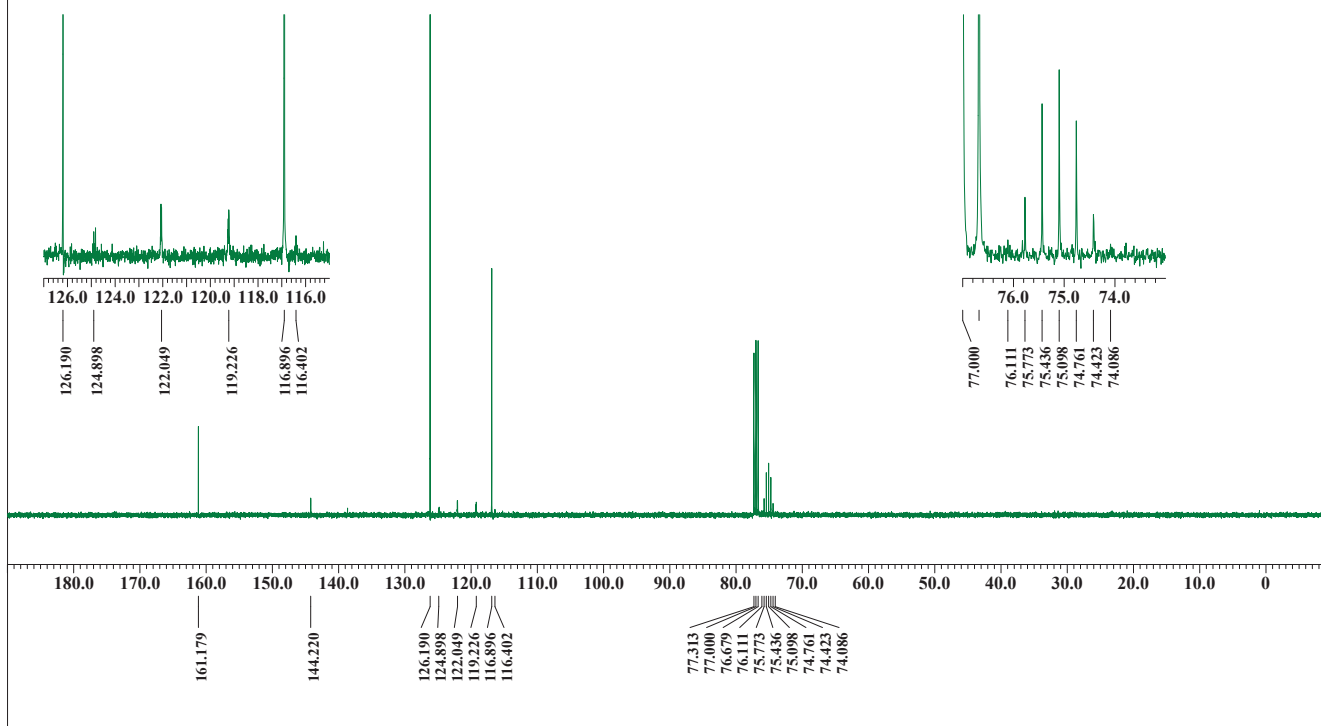

4-((1,1,1,3,3,3-Hexafluoropropan-2-yl)oxy)benzonitrile (3bd)

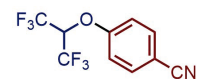

$^1\text{H}$  NMR (400 MHz,  $\text{CDCl}_3$ )

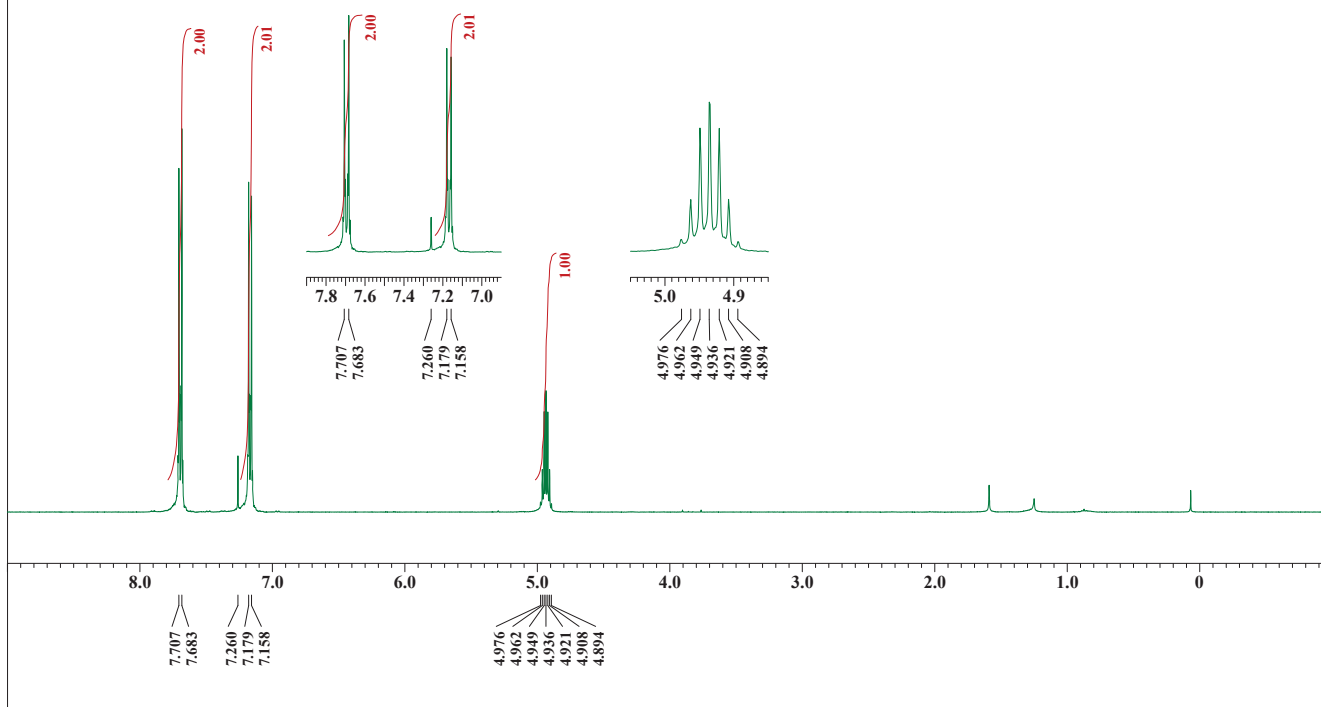

4-((1,1,1,3,3,3-Hexafluoropropan-2-yl)oxy)benzonitrile (3bd)

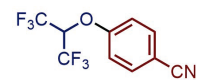

$^{19}\text{F}$  NMR (376 MHz,  $\text{CDCl}_3$ )

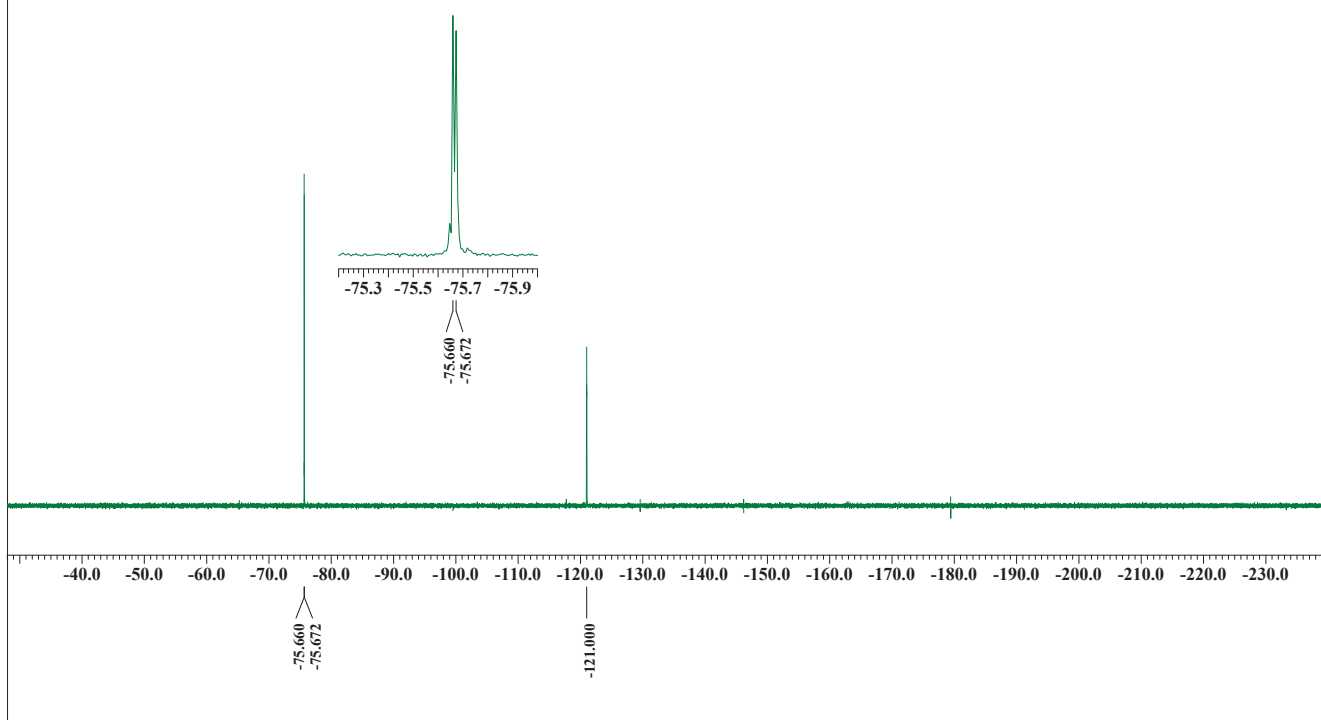

4-((1,1,1,3,3,3-Hexafluoropropan-2-yl)oxy)benzonitrile (3bd)



$^{13}\text{C}\{^1\text{H}\}$  NMR (100 MHz,  $\text{CDCl}_3$ )

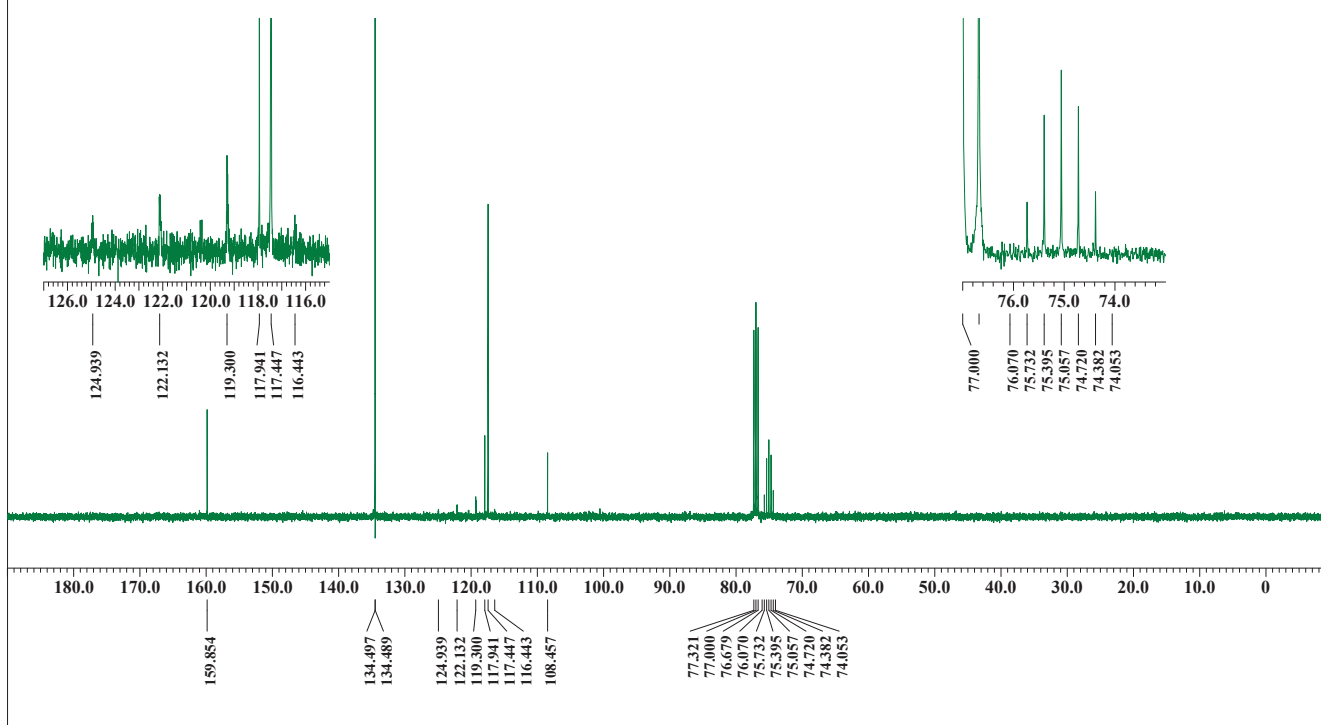

1-Bromo-4-((1,1,1,3,3,3-hexafluoropropan-2-yl)oxy)benzene (3bf)

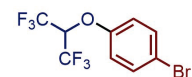

$^1\text{H}$  NMR (400 MHz,  $\text{CDCl}_3$ )

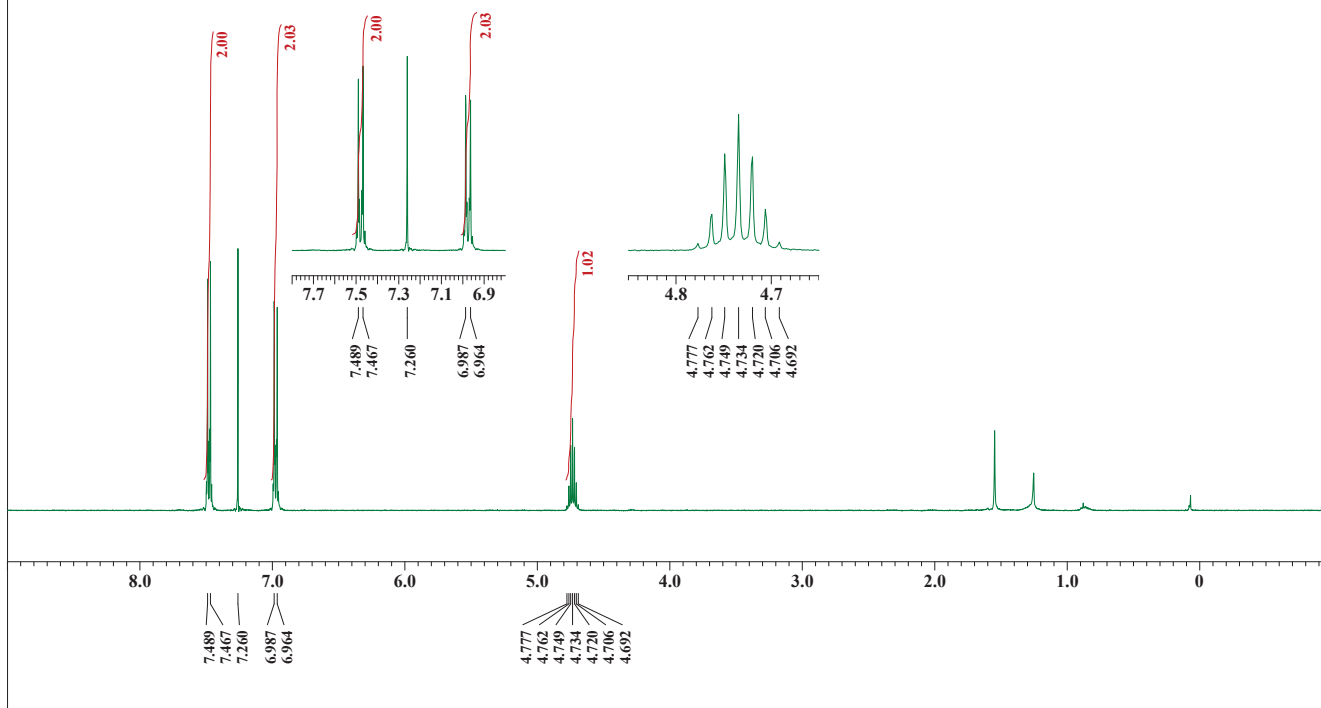

1-Bromo-4-((1,1,1,3,3,3-hexafluoropropan-2-yl)oxy)benzene (3bf)

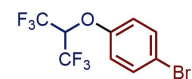

$^{19}\text{F}$  NMR (376 MHz,  $\text{CDCl}_3$ )

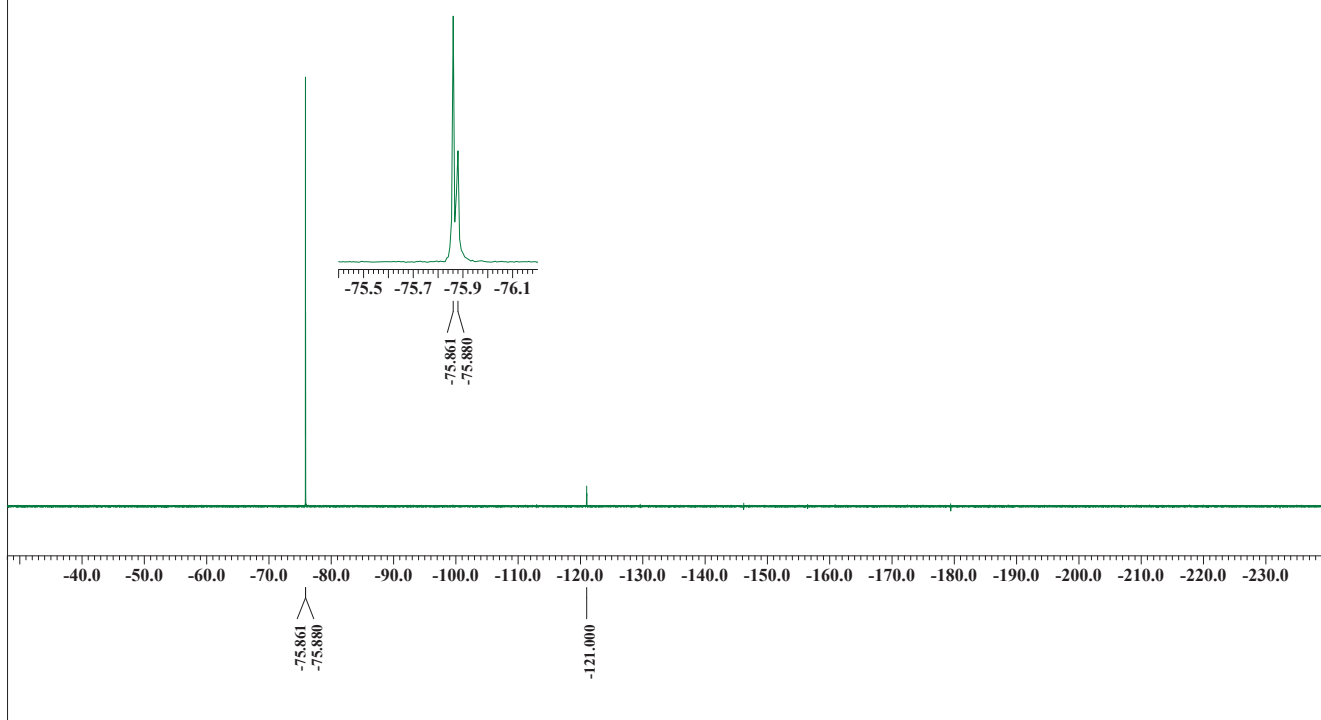

1-Bromo-4-((1,1,1,3,3,3-hexafluoropropan-2-yl)oxy)benzene (3bf)

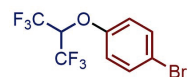

$^{13}\text{C}\{^1\text{H}\}$  NMR (100 MHz,  $\text{CDCl}_3$ )

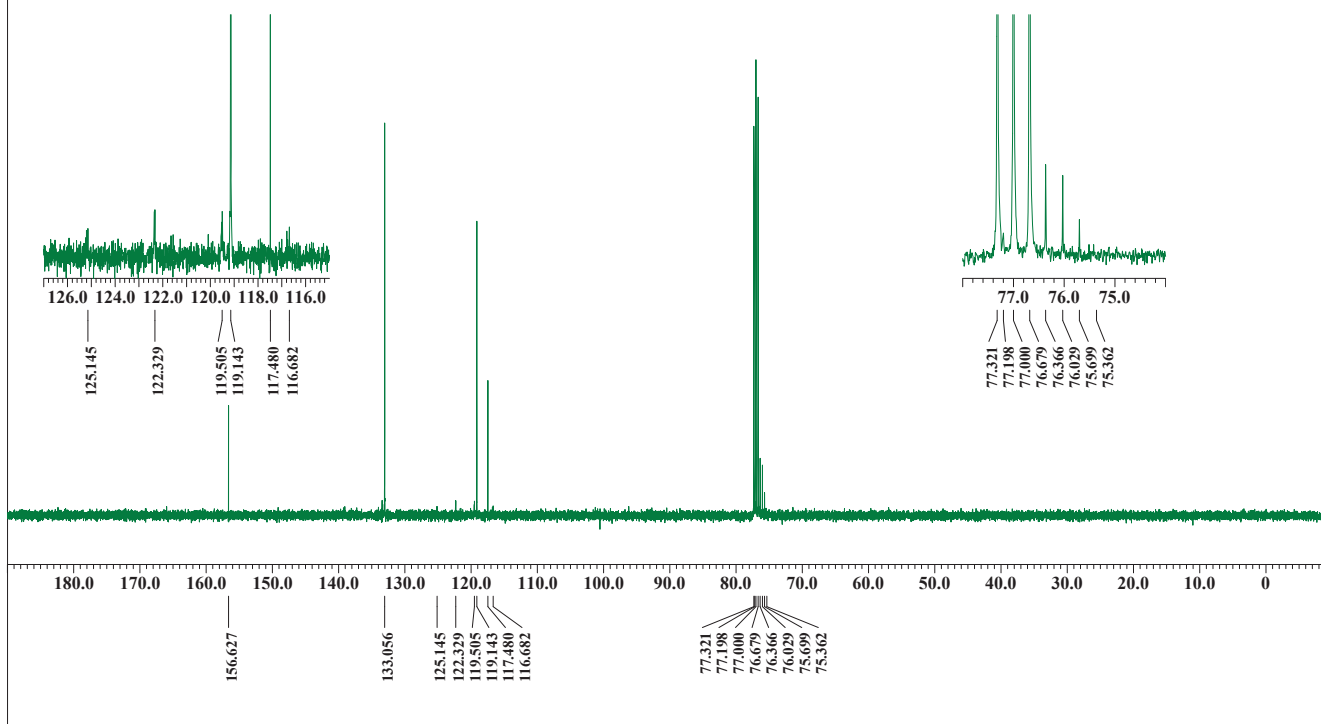

1-((1,1,1,3,3,3-Hexafluoropropan-2-yl)oxy)-4-tert-butylbenzene (3bh)

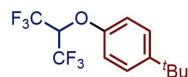

$^1\text{H}$  NMR (400 MHz,  $\text{CDCl}_3$ )

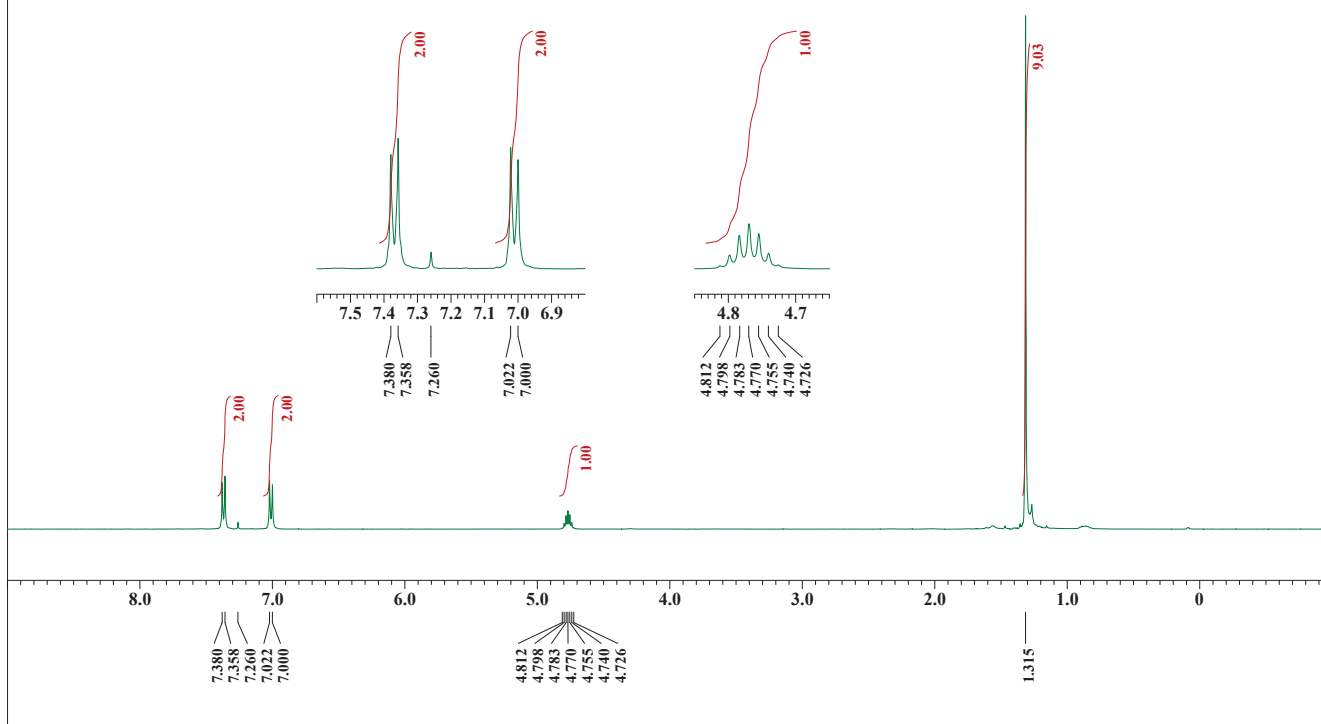

1-((1,1,1,3,3,3-Hexafluoropropan-2-yl)oxy)-4-tert-butylbenzene (3bh)

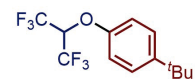

$^{19}\text{F}$  NMR (376 MHz,  $\text{CDCl}_3$ )

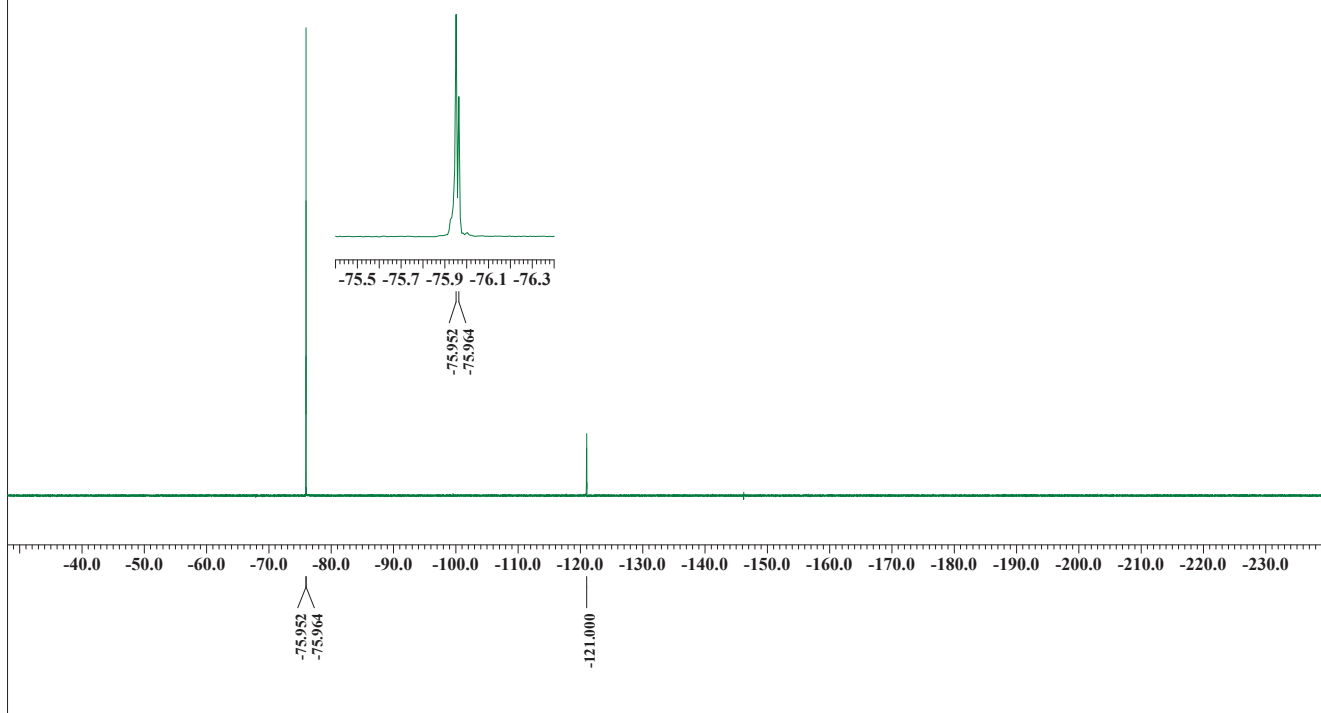

1-((1,1,1,3,3,3-Hexafluoropropan-2-yl)oxy)-4-tert-butylbenzene (3bh)

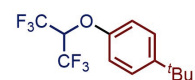

$^{13}\text{C}\{^1\text{H}\}$  NMR (100 MHz,  $\text{CDCl}_3$ )

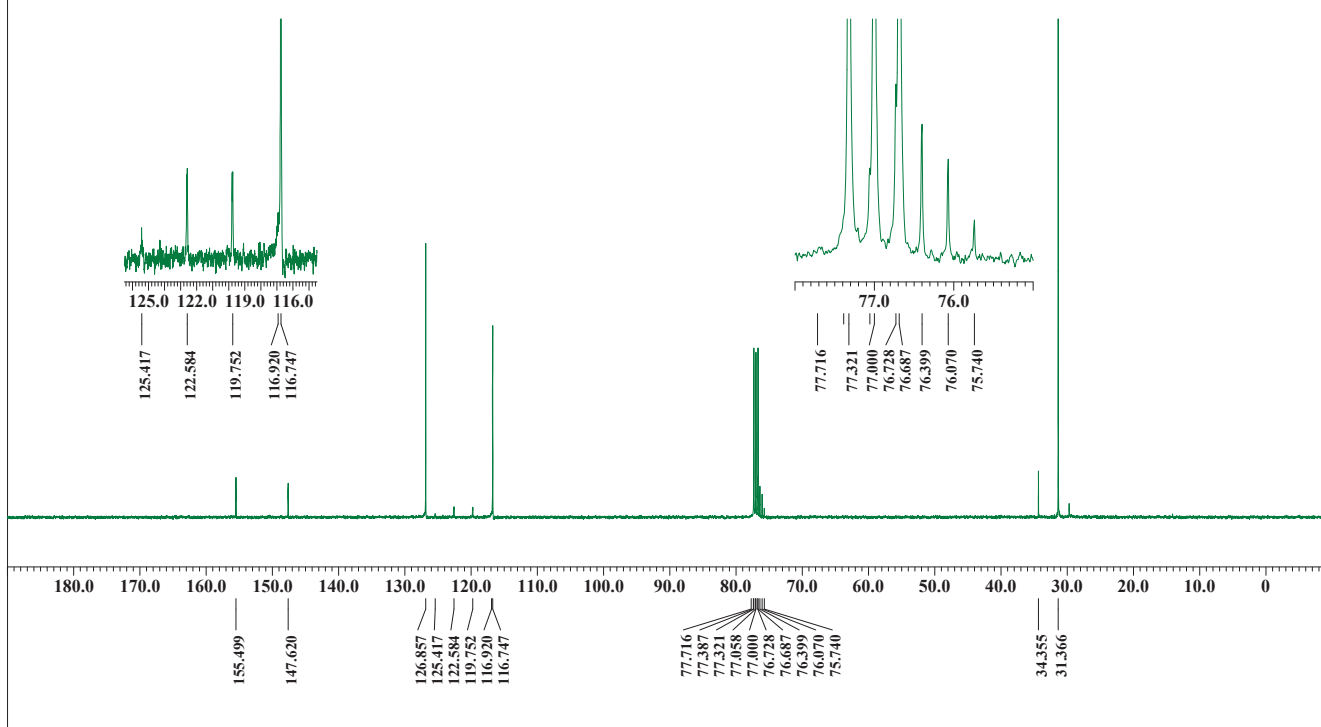

1-((1,1,1,3,3,3-Hexafluoropropan-2-yl)oxy)-3-isobutoxybenzene (3bk)

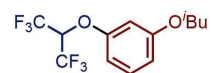

$^1\text{H}$  NMR (400 MHz,  $\text{CDCl}_3$ )

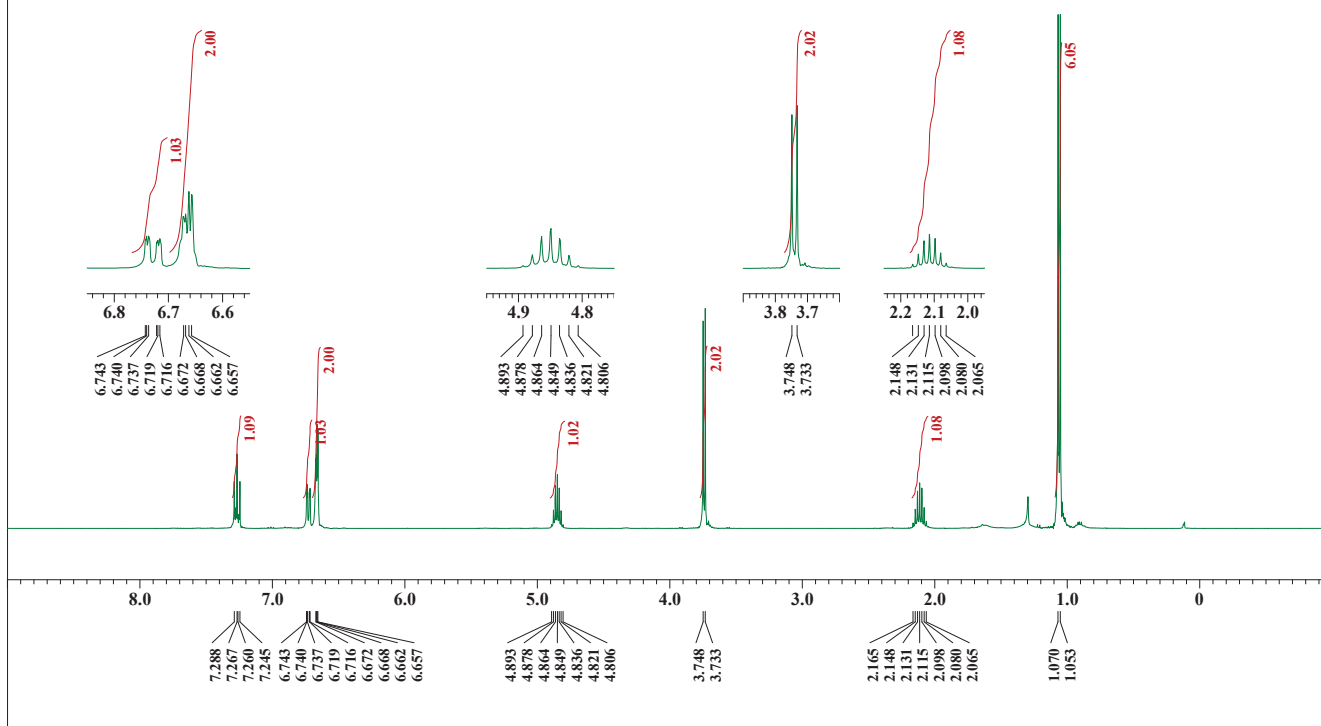

1-((1,1,1,3,3,3-Hexafluoropropan-2-yl)oxy)-3-isobutoxybenzene (3bk)

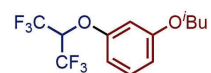

$^{19}\text{F}$  NMR (376 MHz,  $\text{CDCl}_3$ )

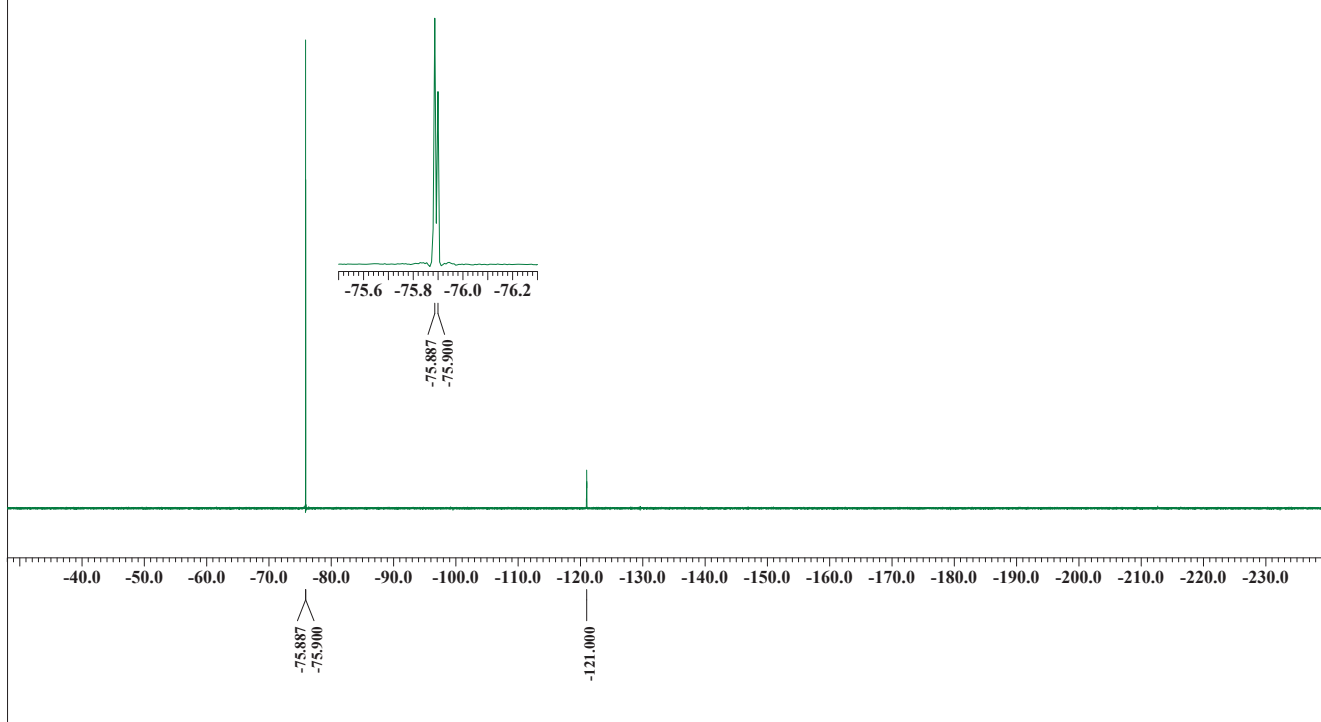



1-((1,1,1,3,3,3-Hexafluoropropan-2-yl)oxy)-3-isobutoxybenzene (3bk)

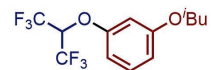

$^{13}\text{C}\{^1\text{H}\}$  NMR (100 MHz,  $\text{CDCl}_3$ )

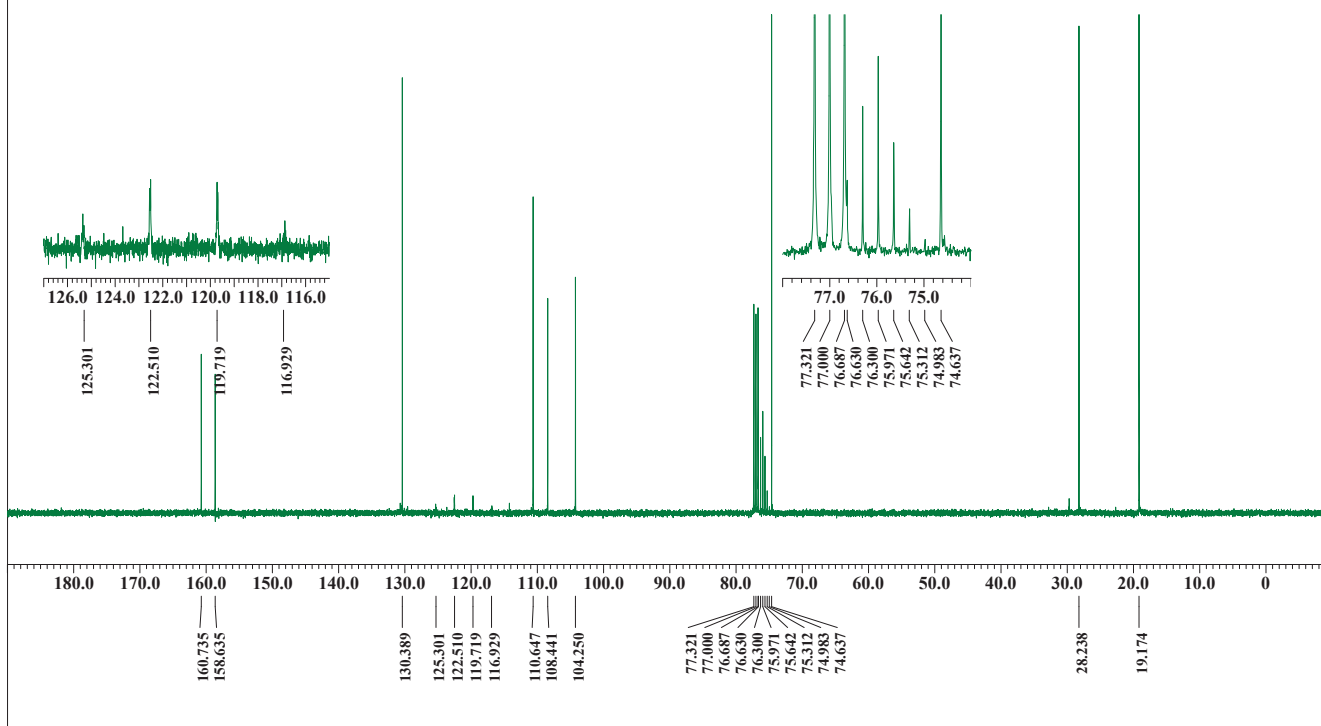

2-Chloro-5-((1,1,1,3,3,3-hexafluoropropan-2-yl)oxy)pyridine (3bl)

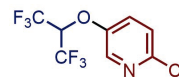

$^1\text{H}$  NMR (400 MHz,  $\text{CDCl}_3$ )

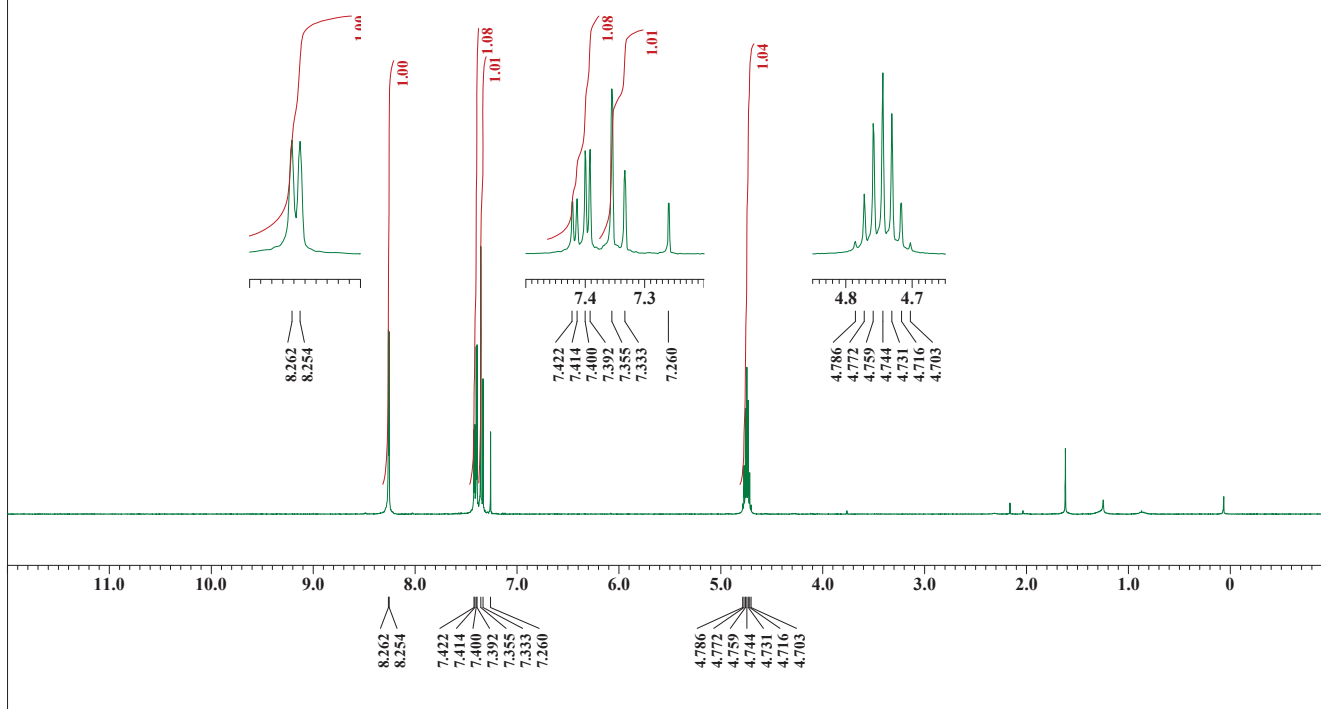

2-Chloro-5-((1,1,1,3,3,3-hexafluoropropan-2-yl)oxy)pyridine (3bl)

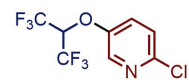

$^{19}\text{F}$  NMR (376 MHz,  $\text{CDCl}_3$ )

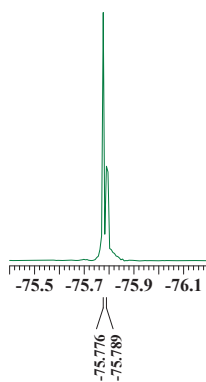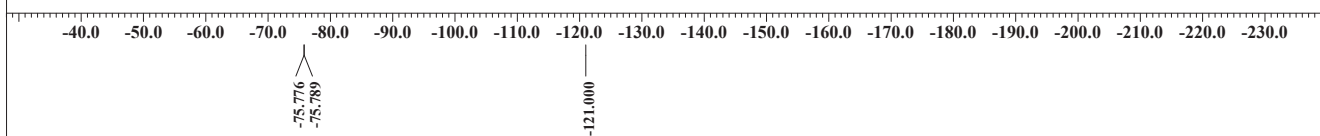

2-Chloro-5-((1,1,1,3,3,3-hexafluoropropan-2-yl)oxy)pyridine (3bl)

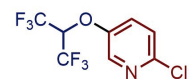

$^{13}\text{C}\{^1\text{H}\}$  NMR (100 MHz,  $\text{CDCl}_3$ )

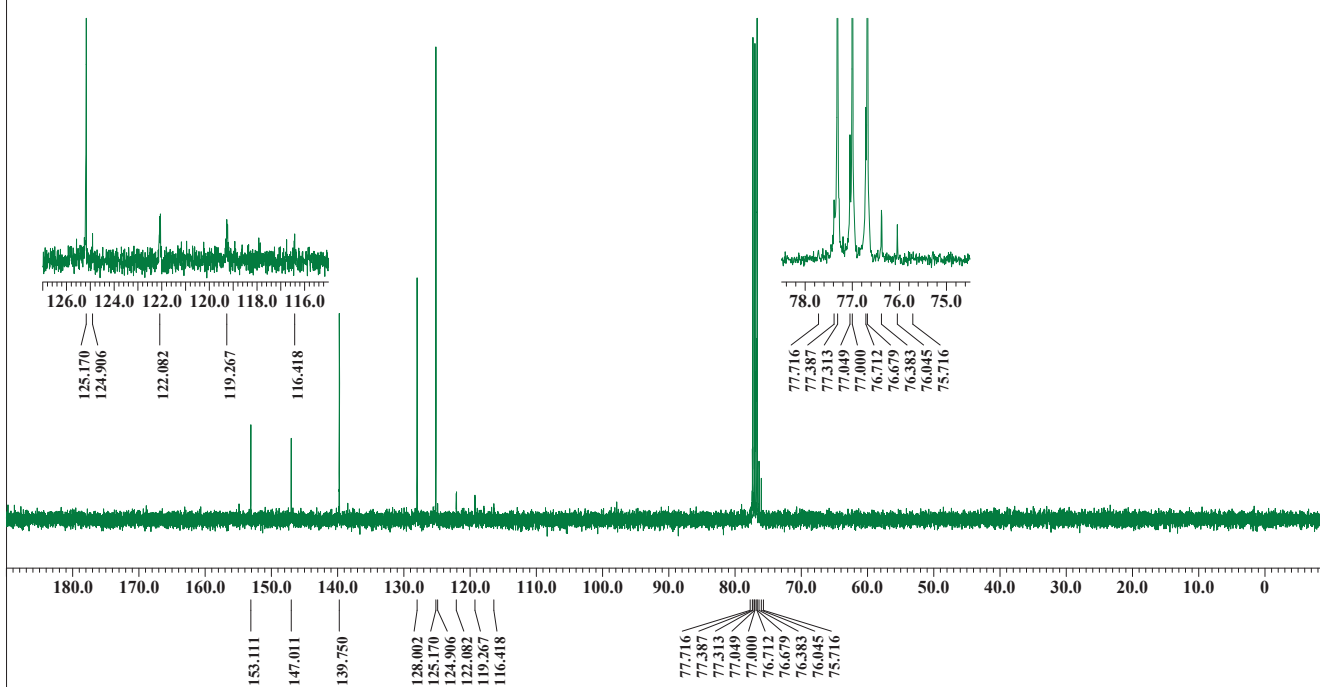

4-((1,1,1,3,3,3-Hexafluoro-2-phenylpropan-2-yl)oxy)-1,1'-biphenyl (3ca)

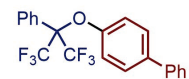

$^1\text{H}$  NMR (400 MHz,  $\text{CDCl}_3$ )

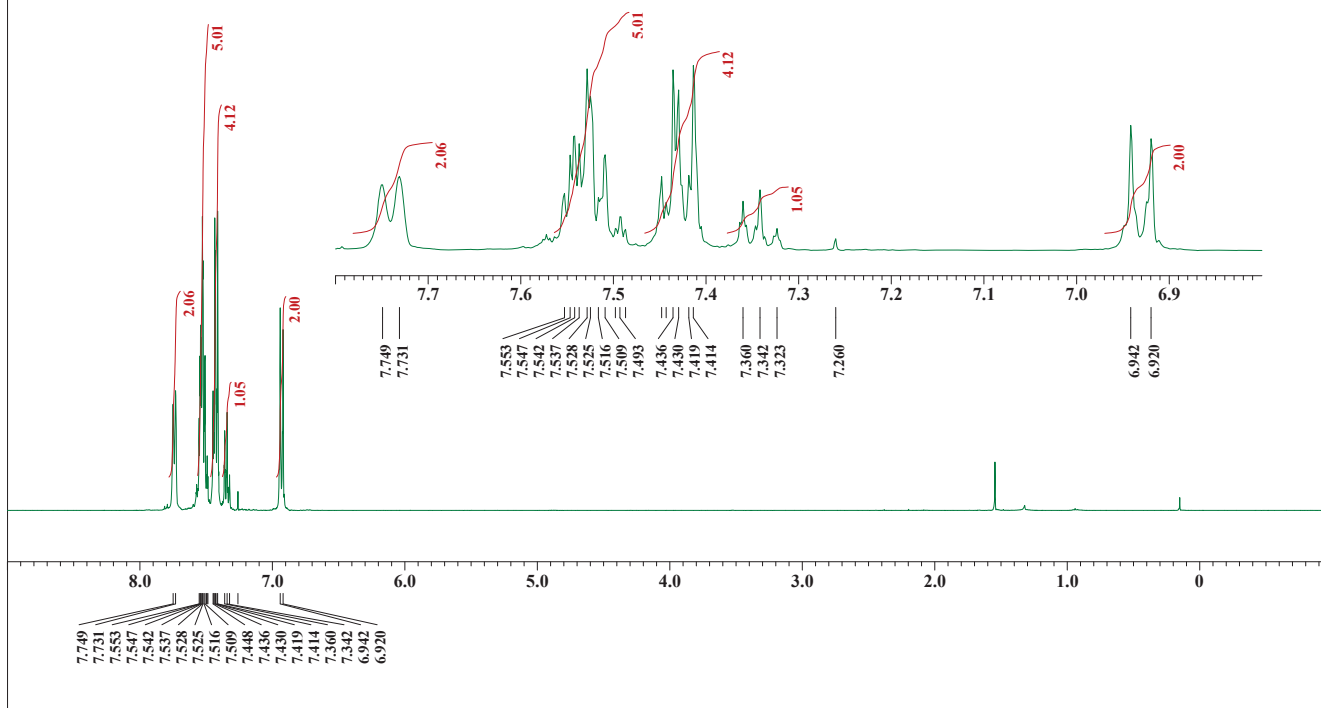

4-((1,1,1,3,3,3-Hexafluoro-2-phenylpropan-2-yl)oxy)-1,1'-biphenyl (3ca)

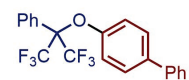

$^{19}\text{F}$  NMR (376 MHz,  $\text{CDCl}_3$ )

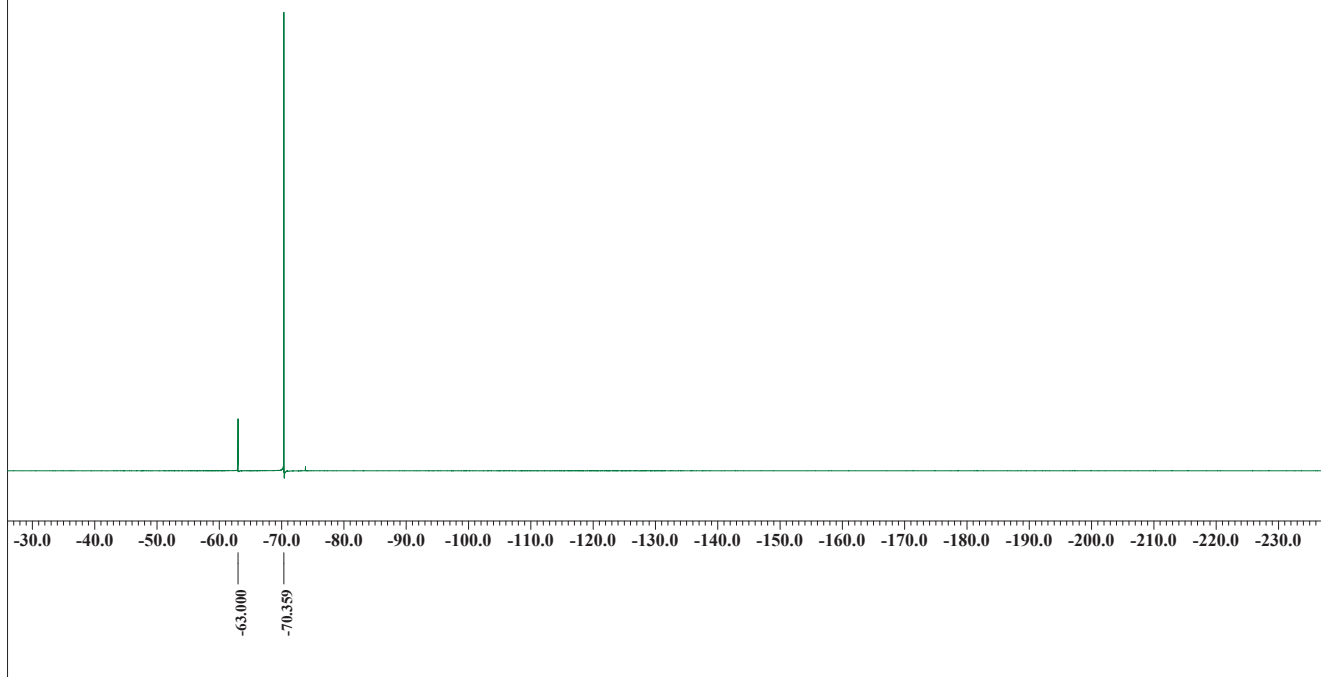

4-((1,1,1,3,3,3-Hexafluoro-2-phenylpropan-2-yl)oxy)-1,1'-biphenyl (3ca)

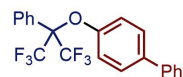

$^{13}\text{C}\{^1\text{H}\}$  NMR (100 MHz,  $\text{CDCl}_3$ )

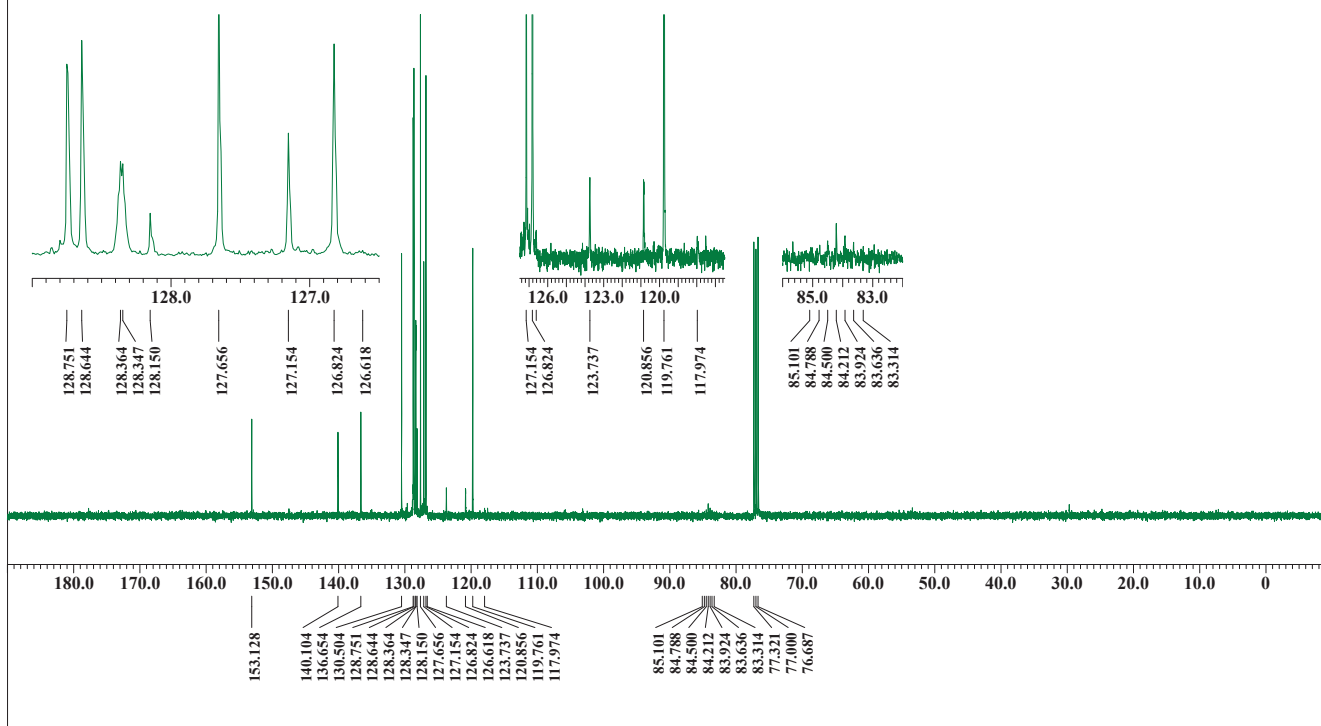

4-((1,1,1,3,3,3-Hexafluoro-2-(trifluoromethyl)propan-2-yl)oxy)-1,1'-biphenyl (3da)

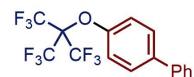

$^1\text{H}$  NMR (400 MHz,  $\text{CDCl}_3$ )

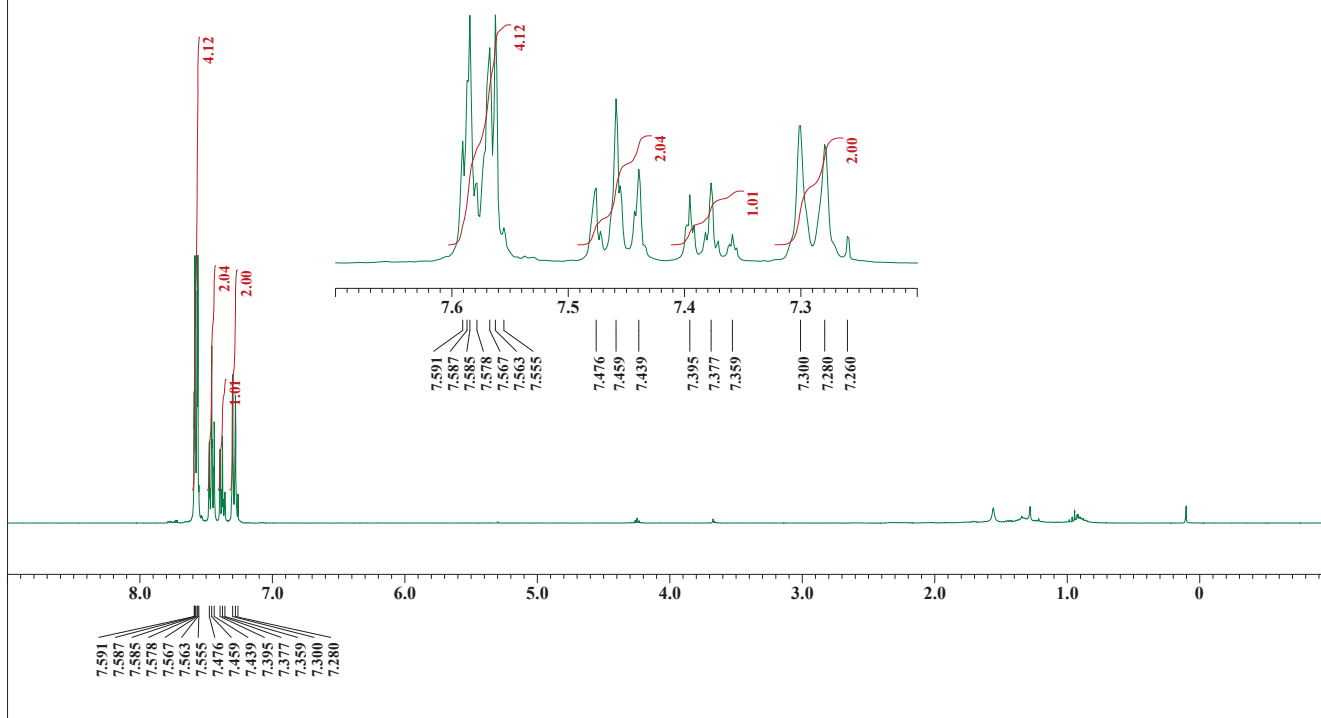

4-((1,1,1,3,3,3-Hexafluoro-2-(trifluoromethyl)propan-2-yl)oxy)-1,1'-biphenyl (3da)

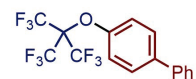

$^{19}\text{F}$  NMR (376 MHz,  $\text{CDCl}_3$ )

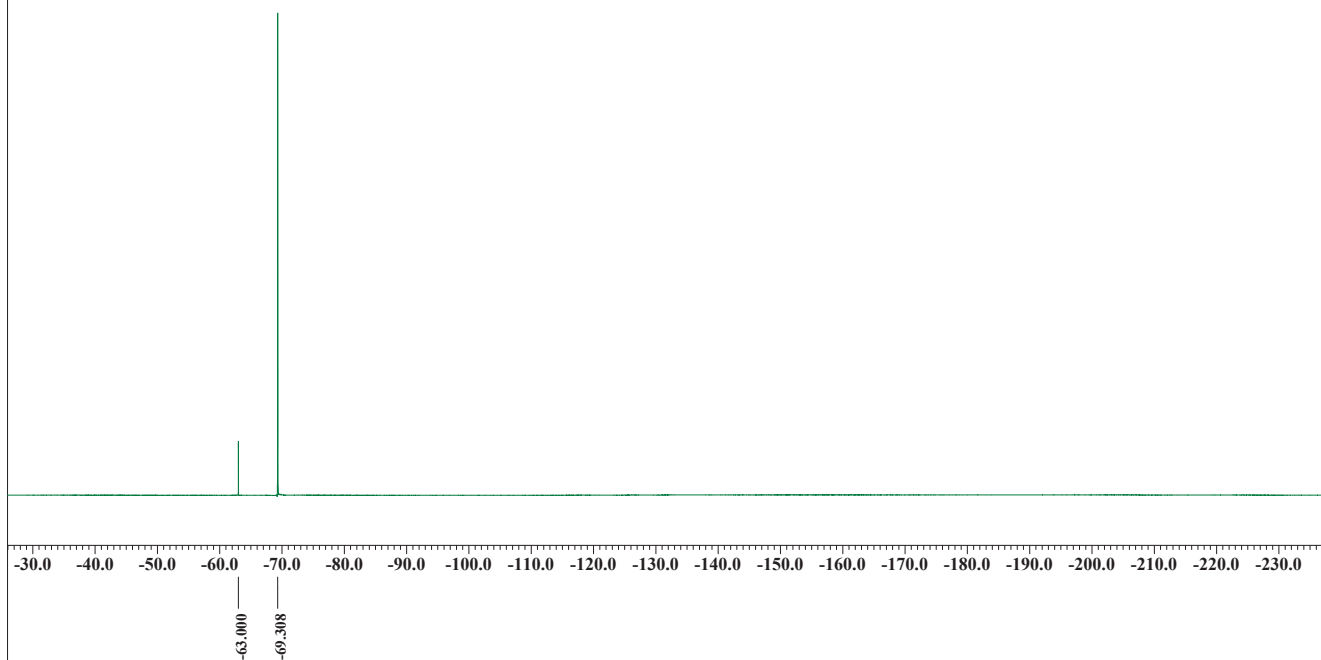

4-((1,1,1,3,3,3-Hexafluoro-2-(trifluoromethyl)propan-2-yl)oxy)-1,1'-biphenyl (3da)

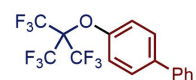

$^{13}\text{C}\{^1\text{H},^{19}\text{F}\}$  NMR (125 MHz,  $\text{CDCl}_3$ )

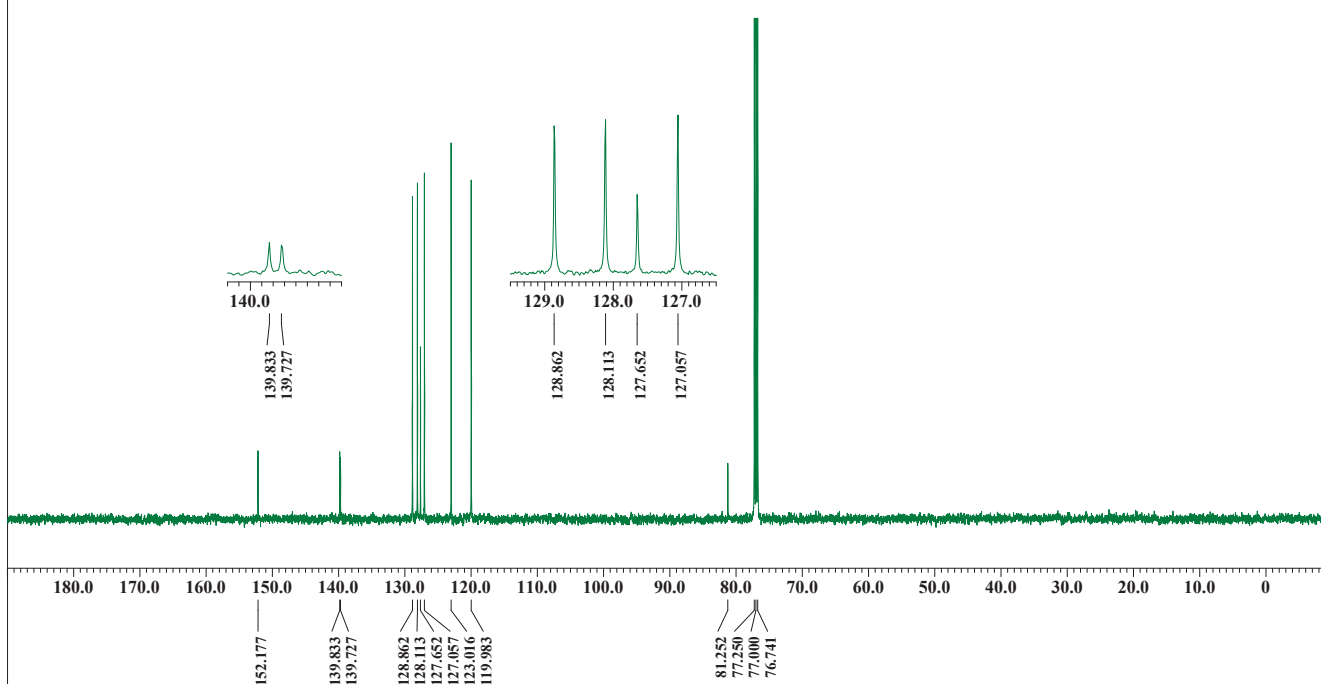

4-((2,2,3,3,4,4,5,5,6,6,6-Undecafluorohexyl)oxy)-1,1'-biphenyl (3ea)

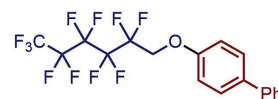

$^1\text{H}$  NMR (400 MHz,  $\text{CDCl}_3$ )

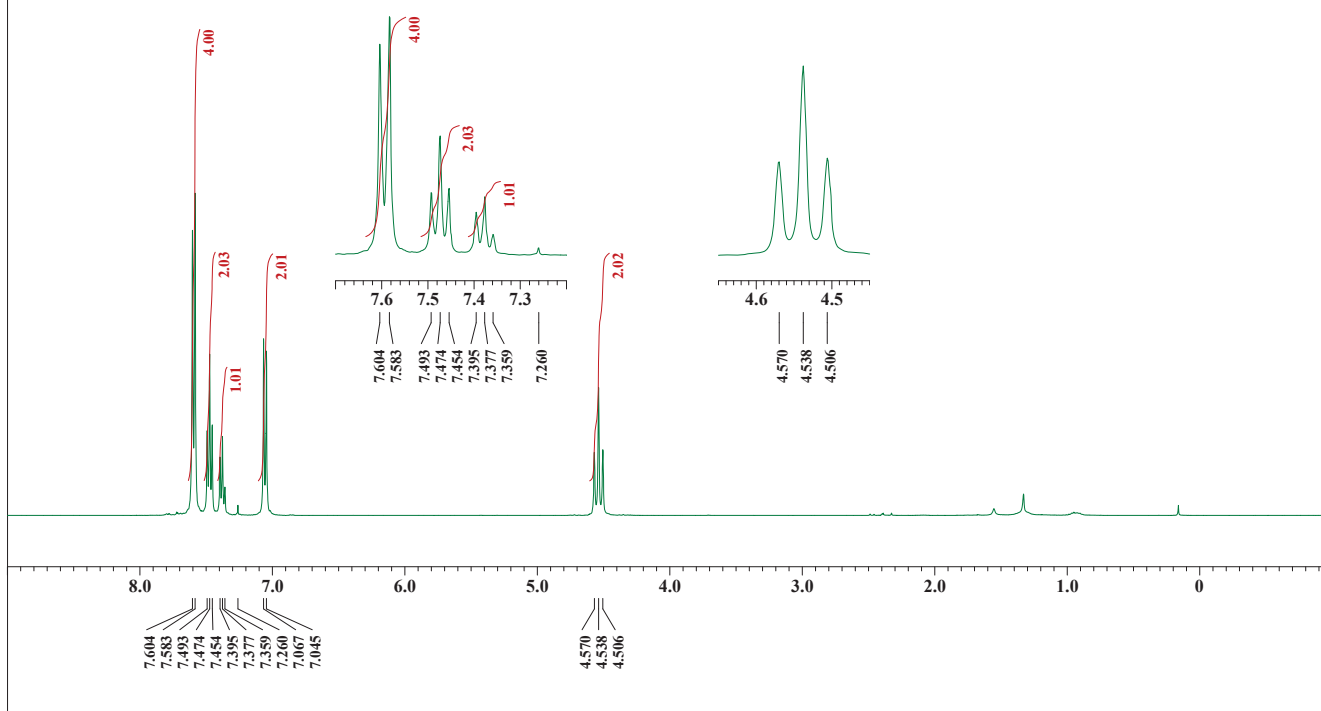

4-((2,2,3,3,4,4,5,5,6,6,6-Undecafluorohexyl)oxy)-1,1'-biphenyl (3ea)

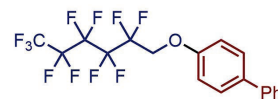

$^{19}\text{F}$  NMR (376 MHz,  $\text{CDCl}_3$ )

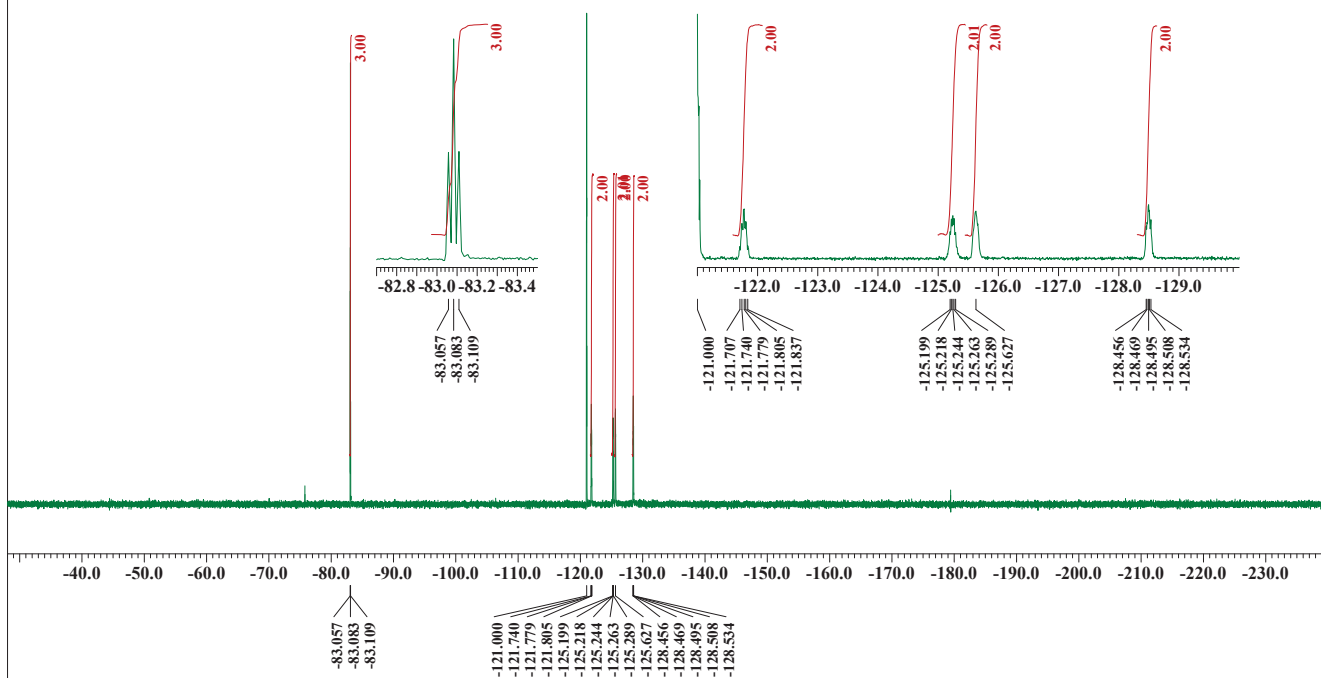

Supplement: d4cc04008b1.pdf [file d4cc04008b1.pdf]
